# Supplementary material for: Yeast Growth Plasticity Is Regulated by Environment-Specific Multi-QTL Interactions
Source: PubMed Central journal article supplement (PMC4025475; doi:10.1534/g3.113.009142), 2014-01-28

# Interaction plot for chr14\_465189 and Environment

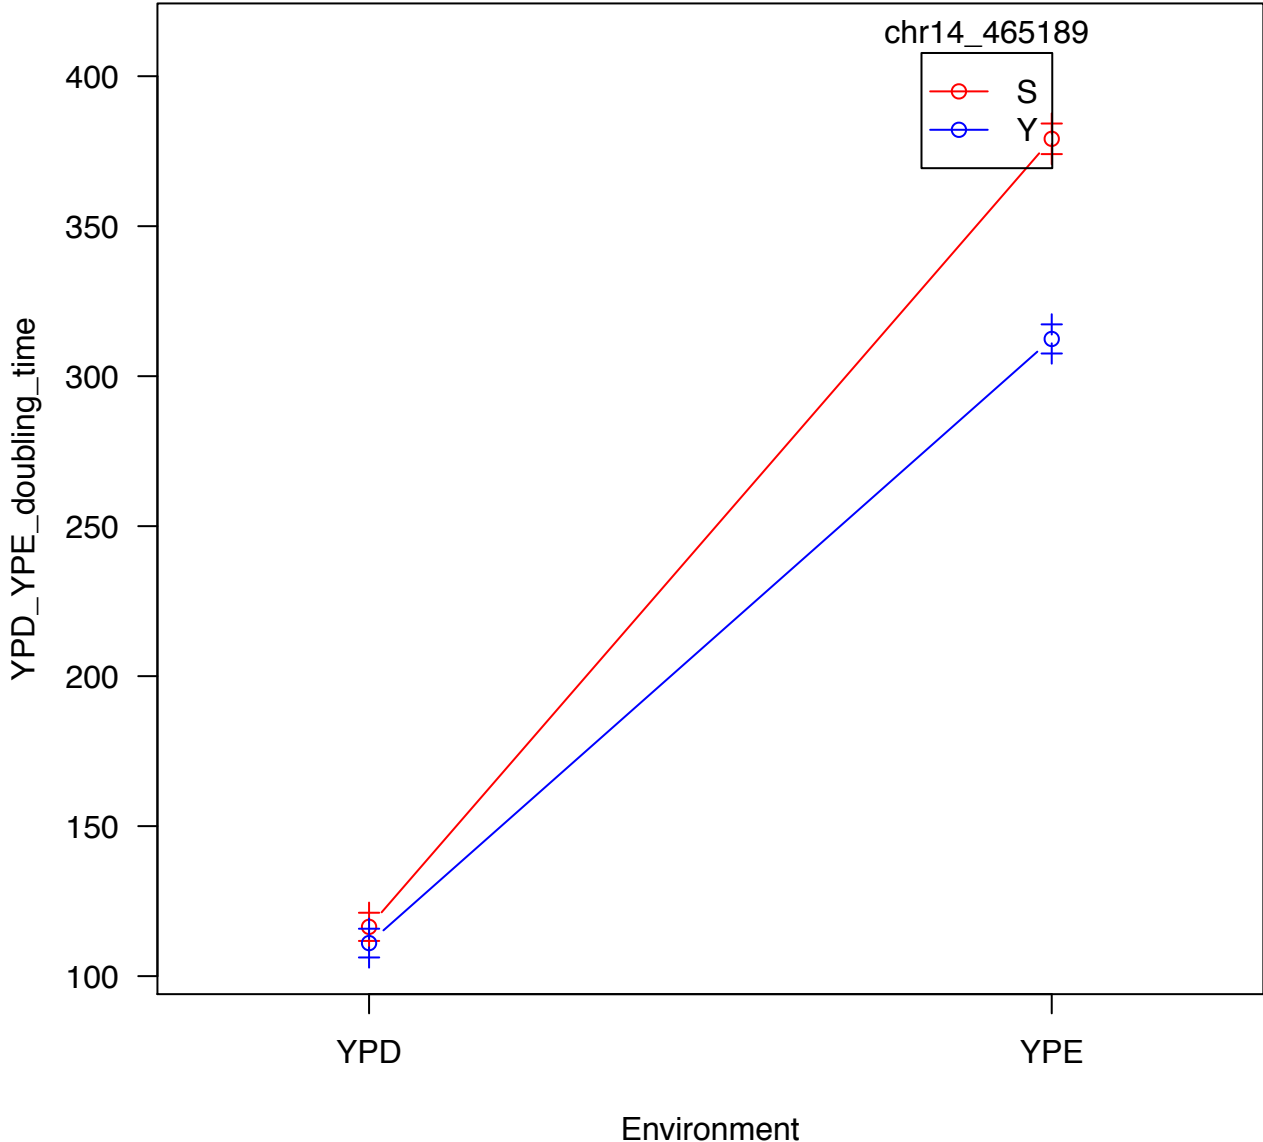

# Interaction plot for chr05\_377186 and Environment

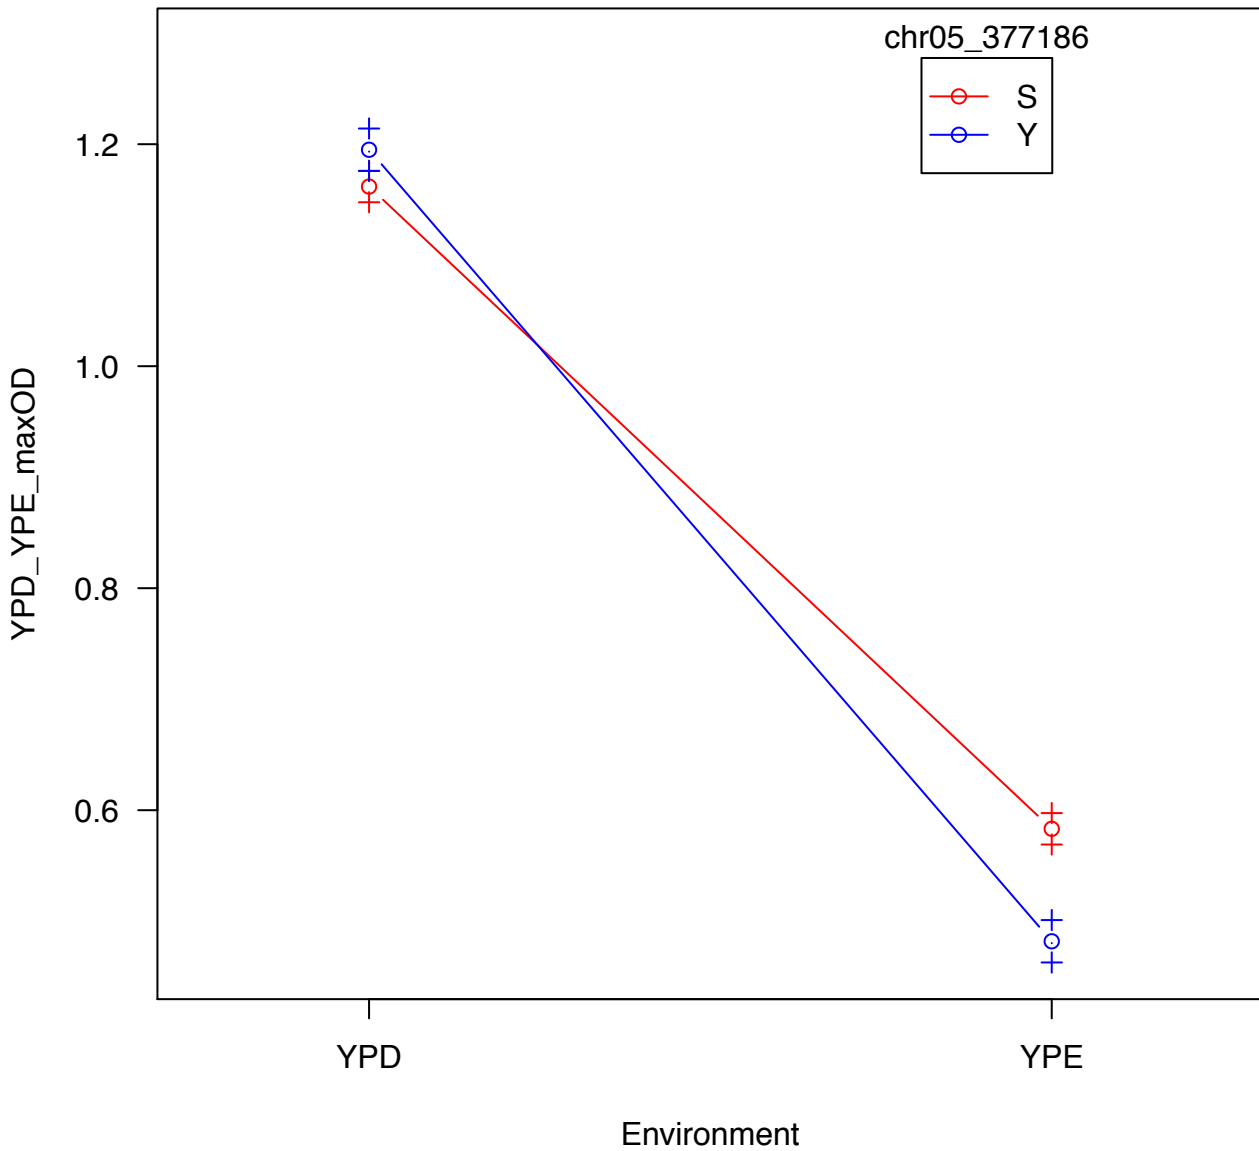

# Interaction plot for chr14\_468490 and Environment

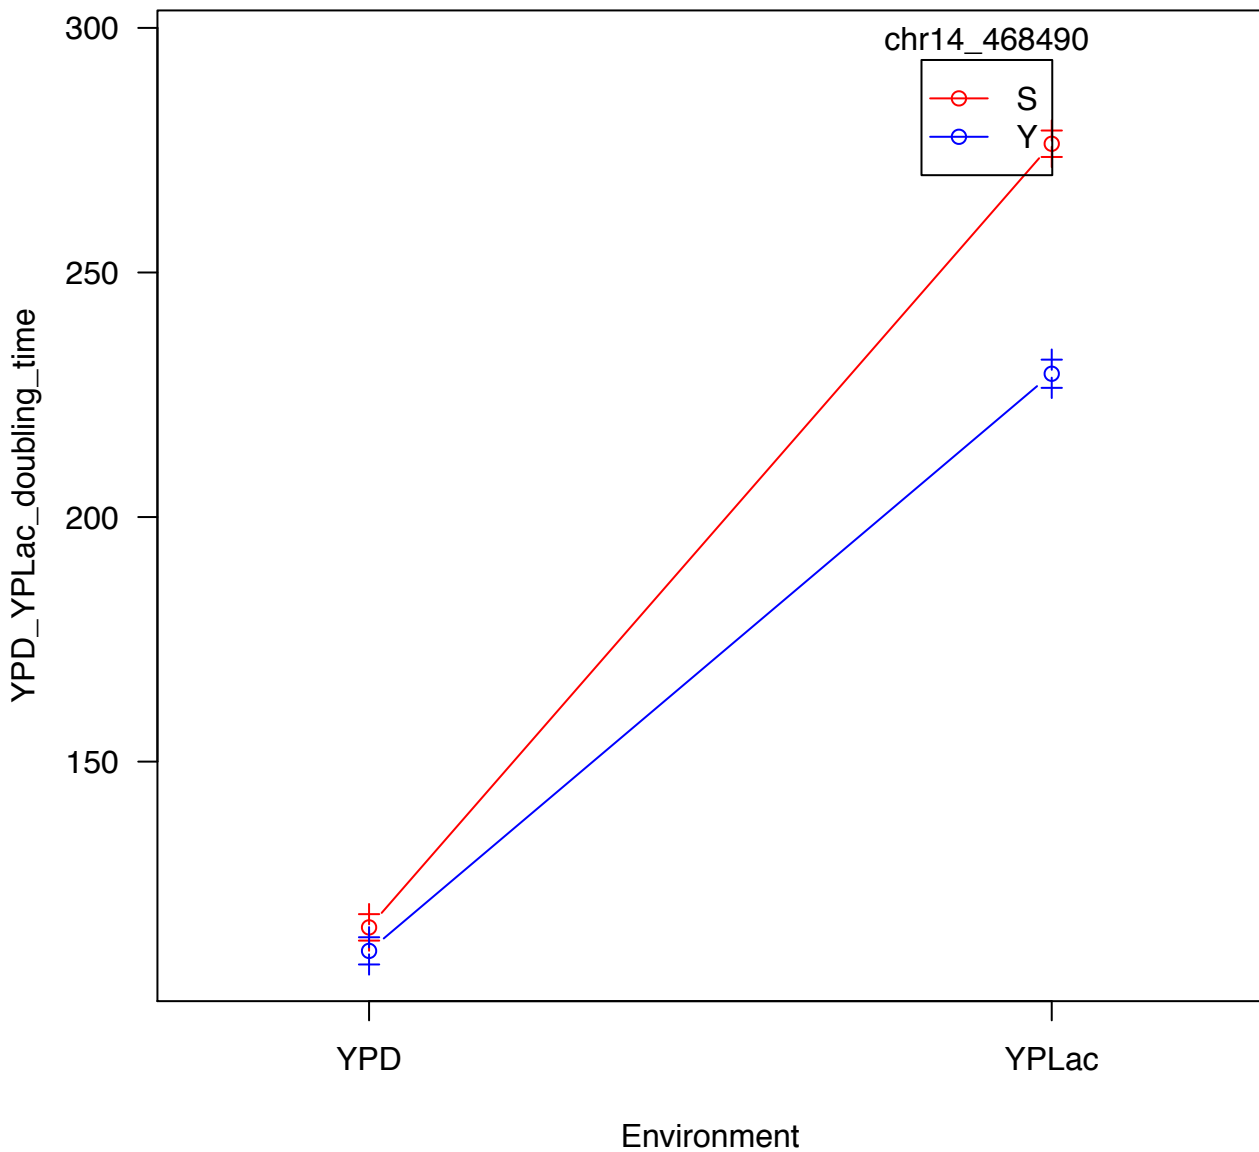

# Interaction plot for chr07\_1069012 and Environment

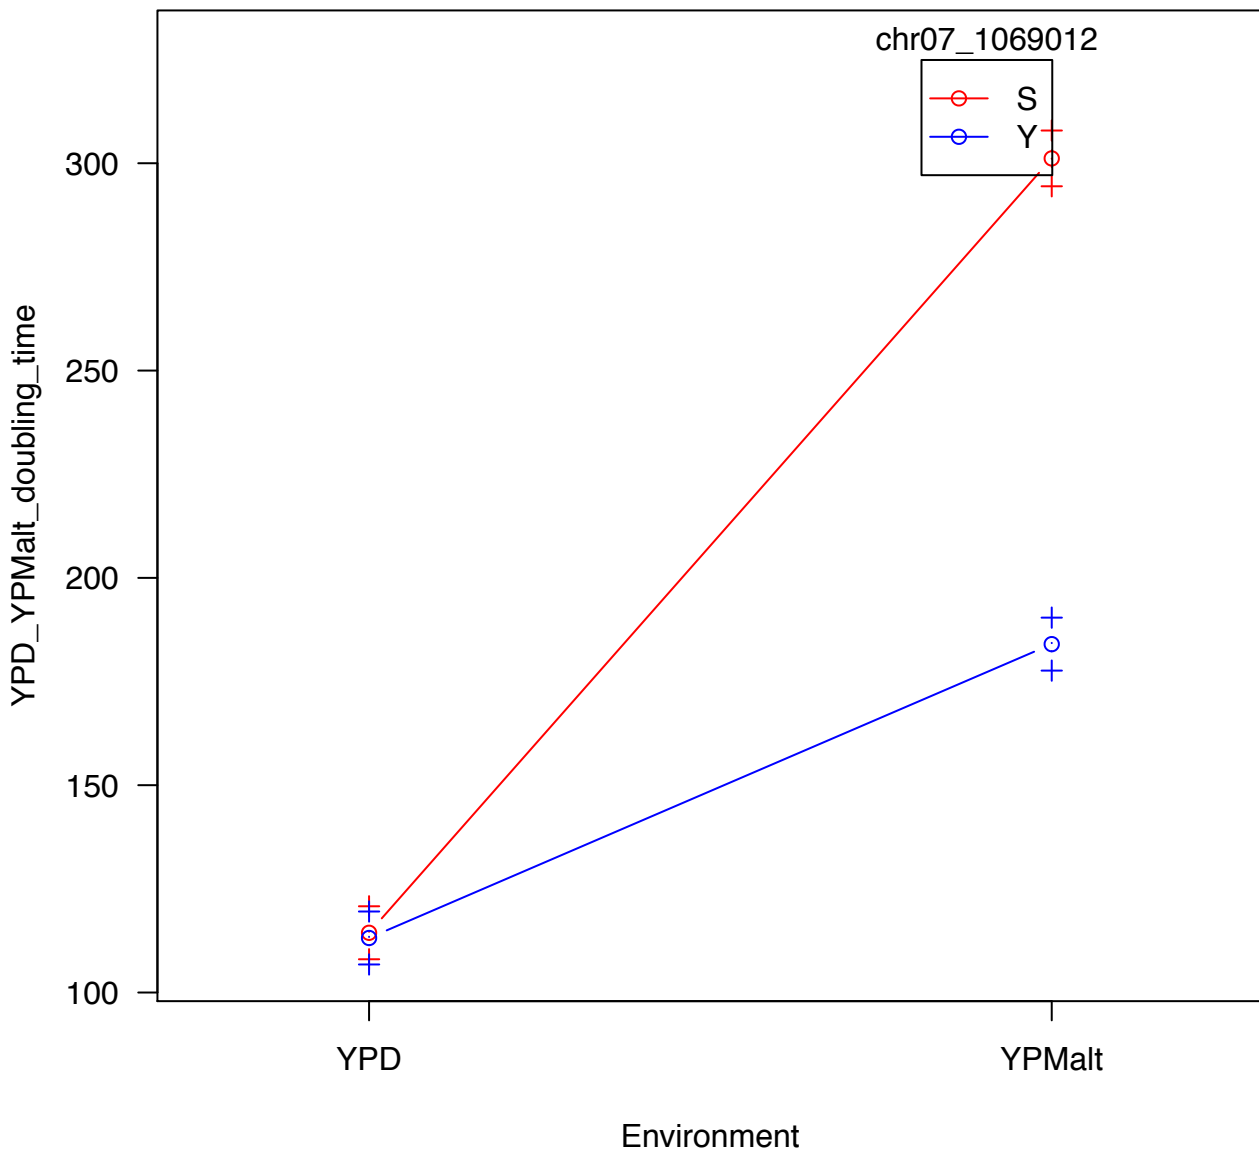

# Interaction plot for chr15\_656568 and Environment

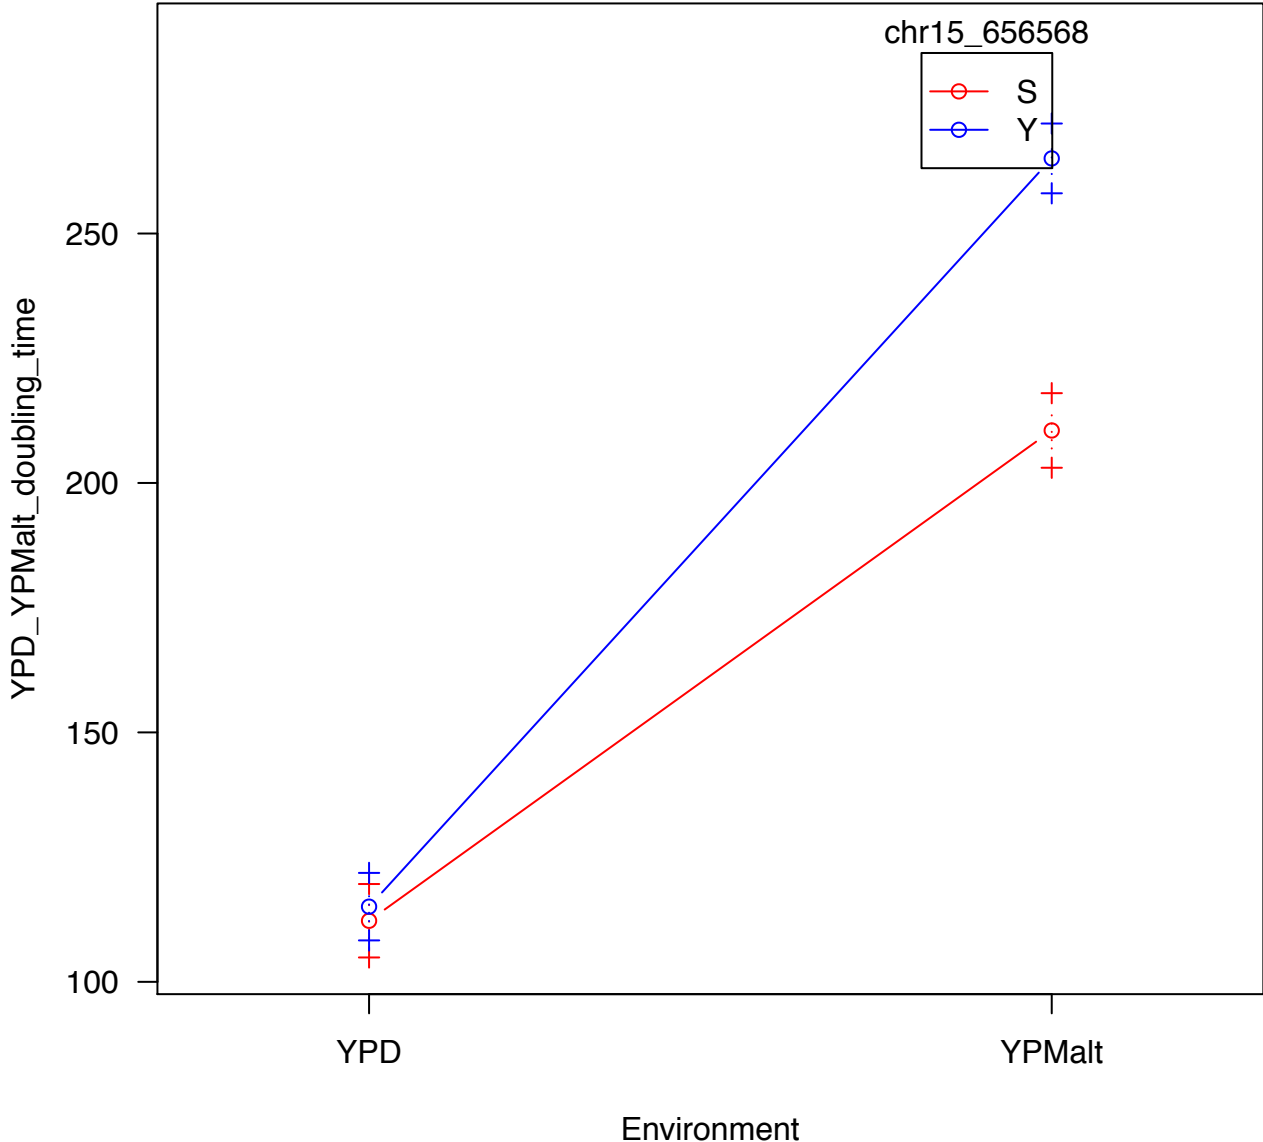

# Interaction plot for chr07\_1069012 and Environment

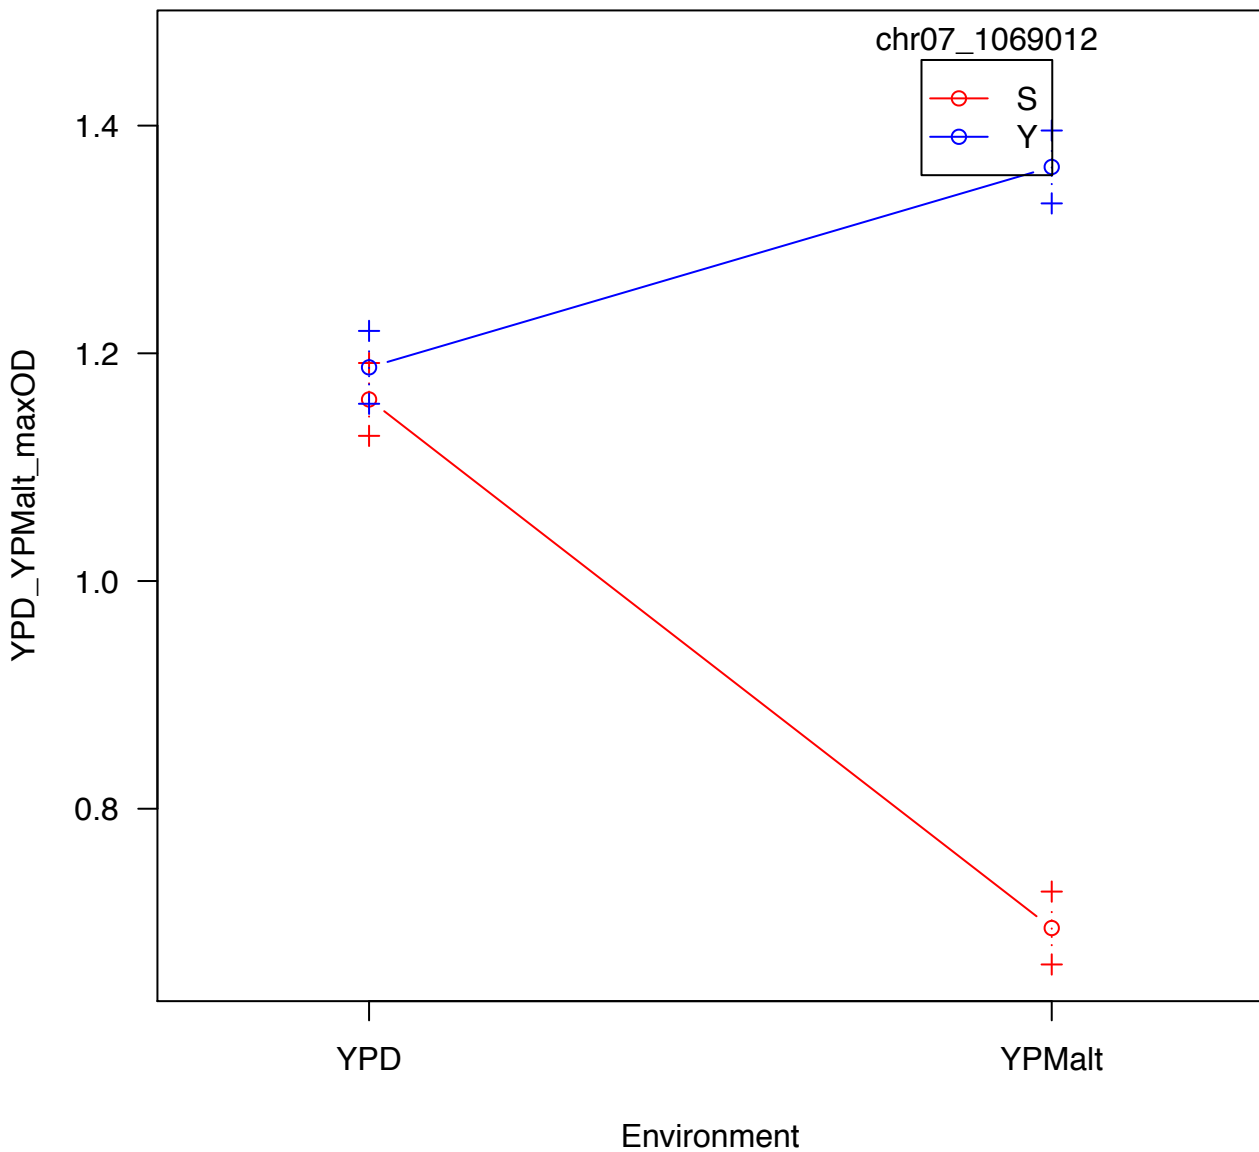

# Interaction plot for chr14\_465189 and Environment

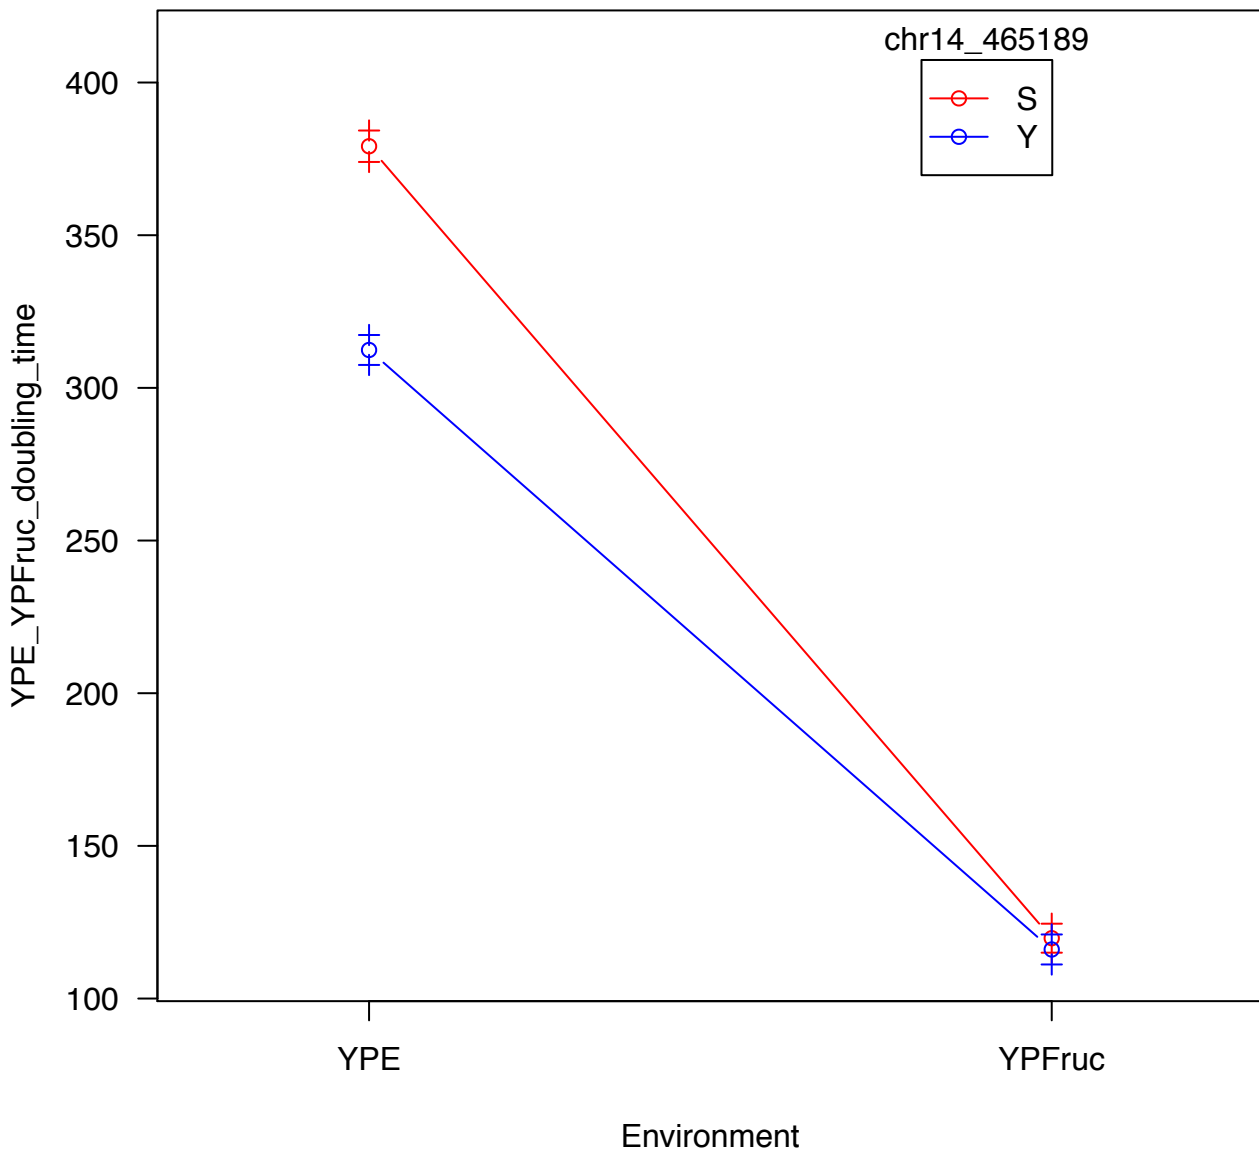

# Interaction plot for chr02\_717828 and Environment

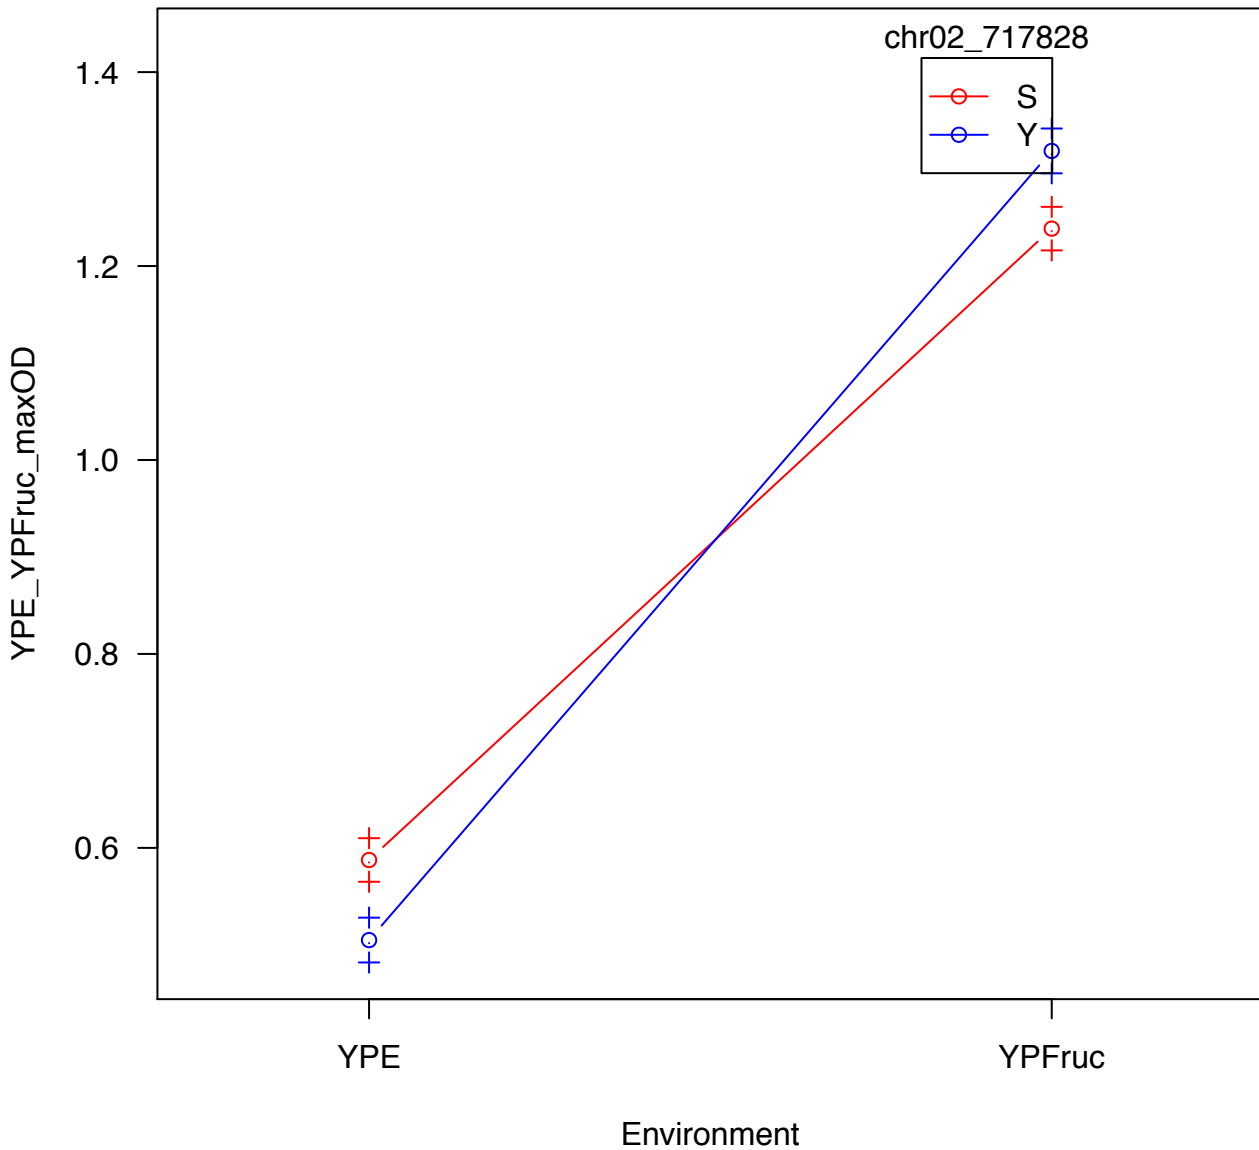



# Interaction plot for chr05\_377186 and Environment

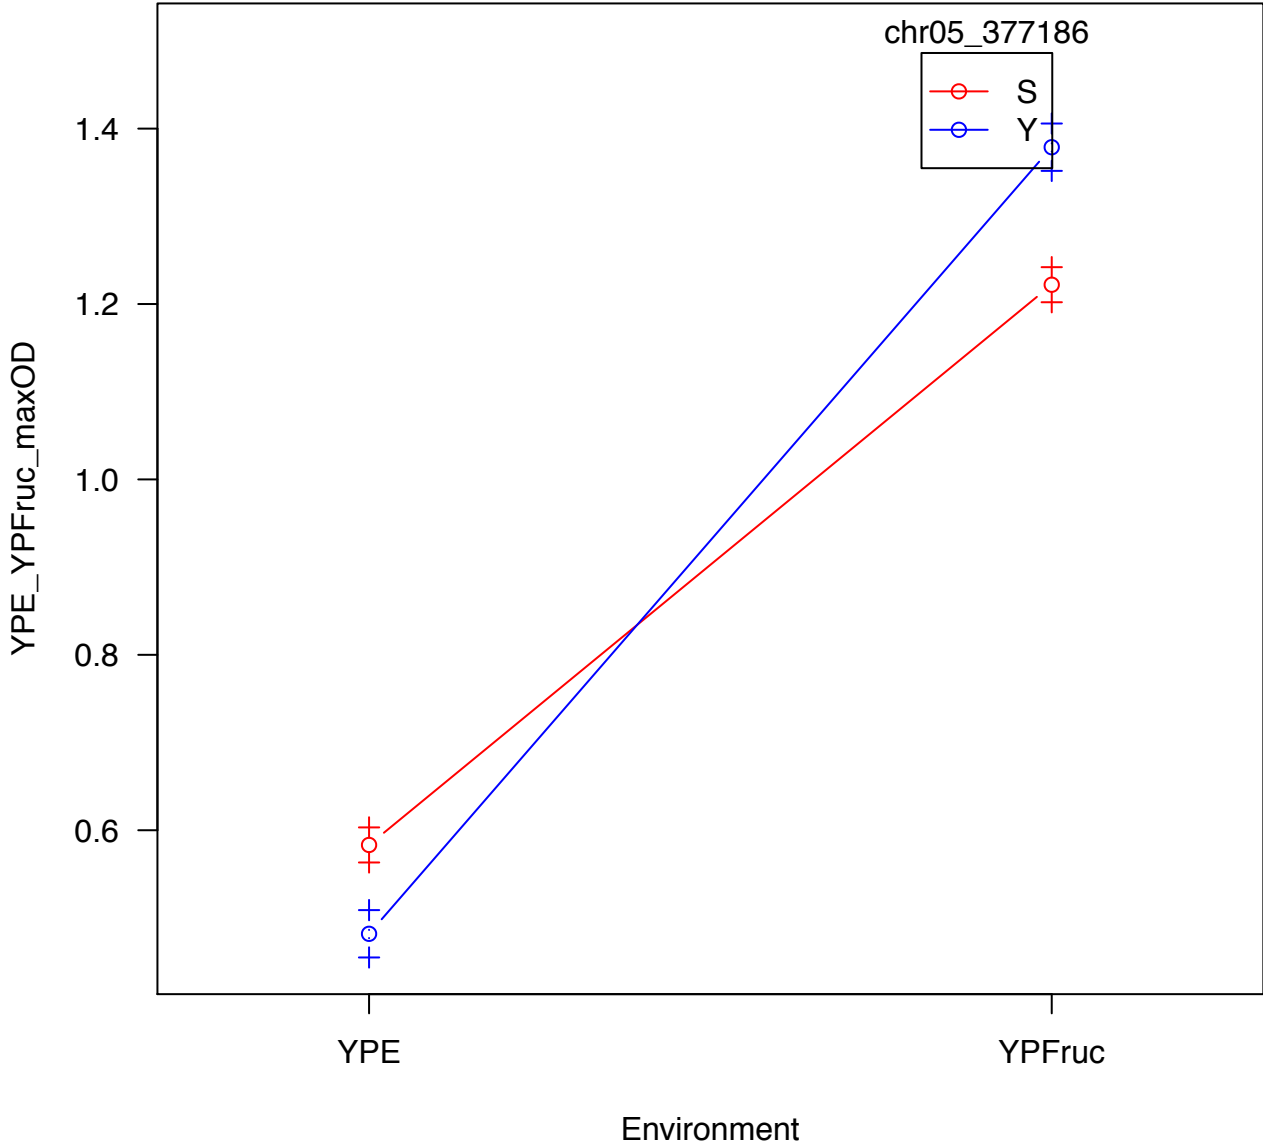

# Interaction plot for chr07\_42563 and Environment

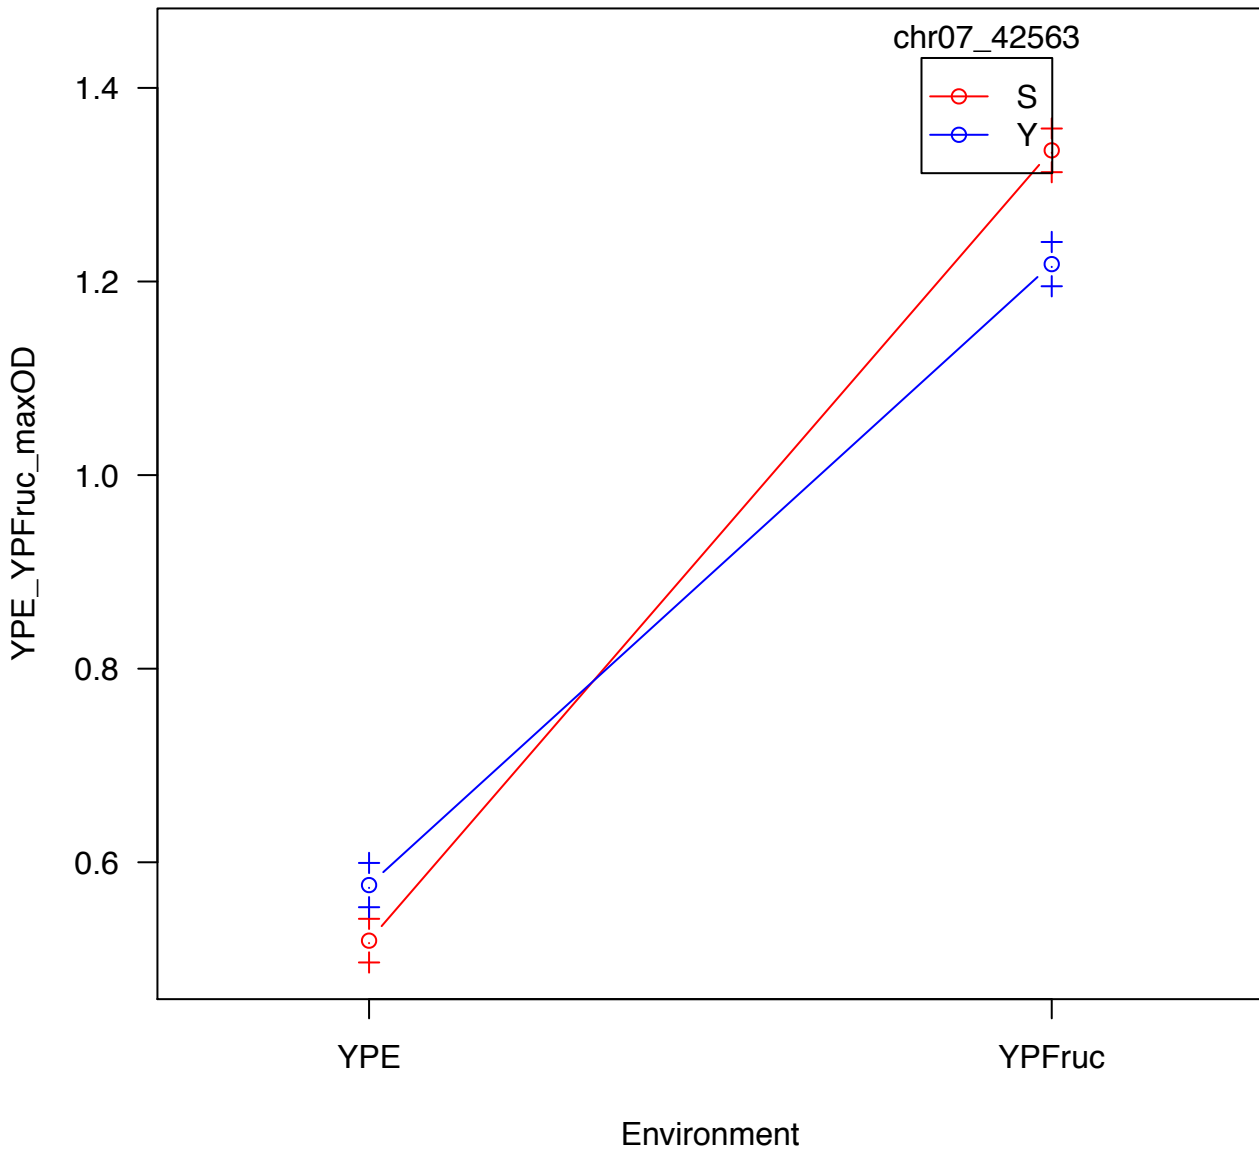

# Interaction plot for chr14\_465189 and Environment

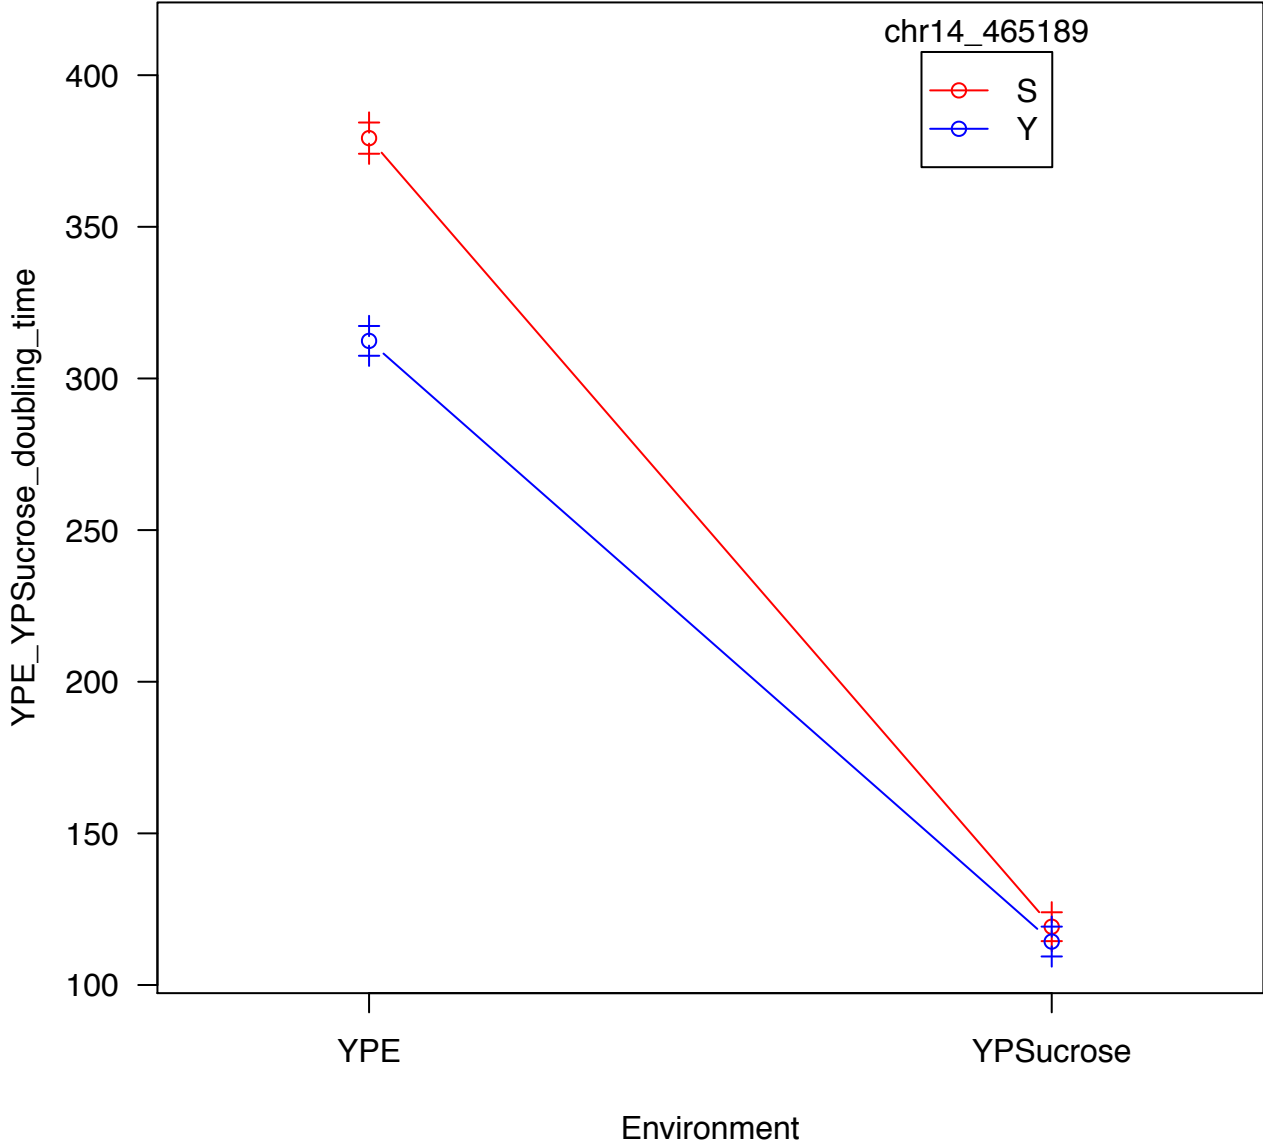

# Interaction plot for chr02\_717828 and Environment

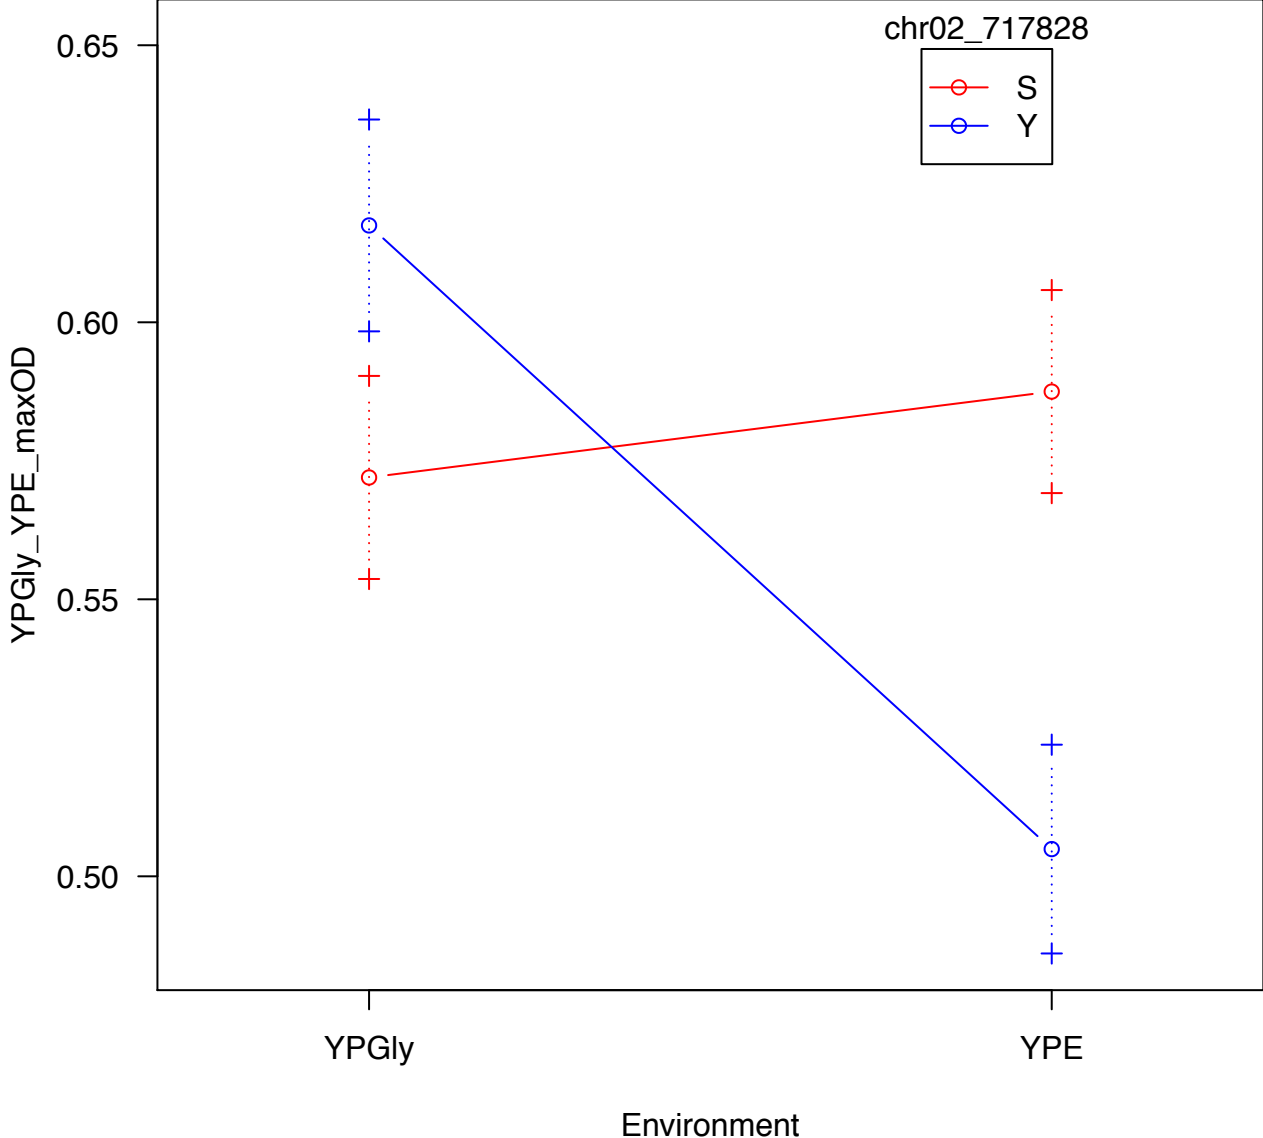

# Interaction plot for chr05\_377186 and Environment

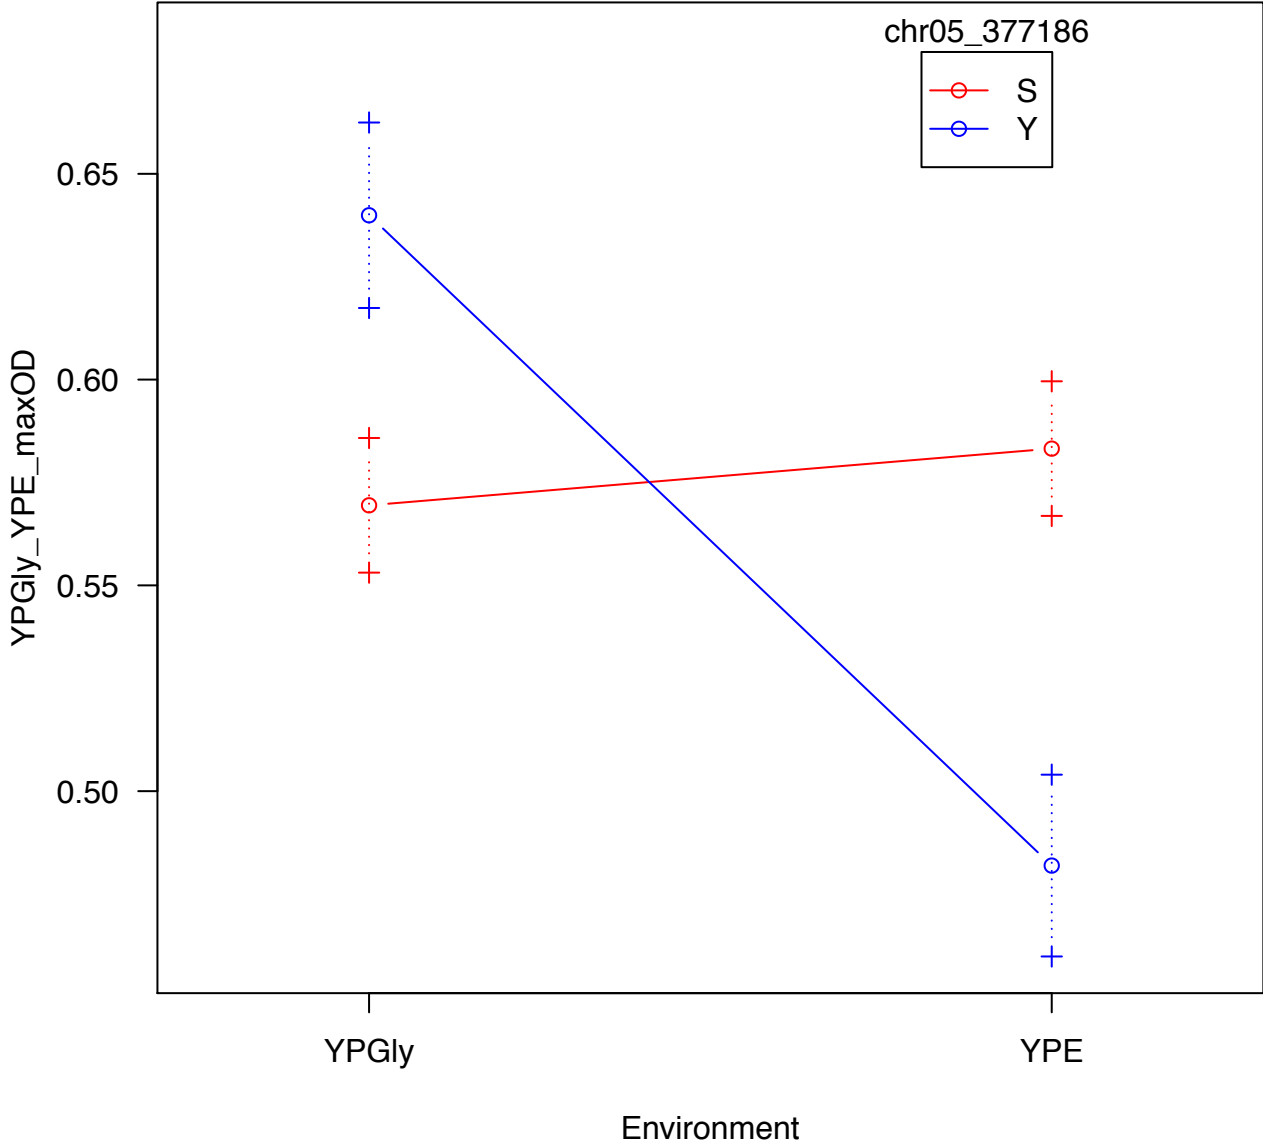

# Interaction plot for chr07\_25442 and Environment

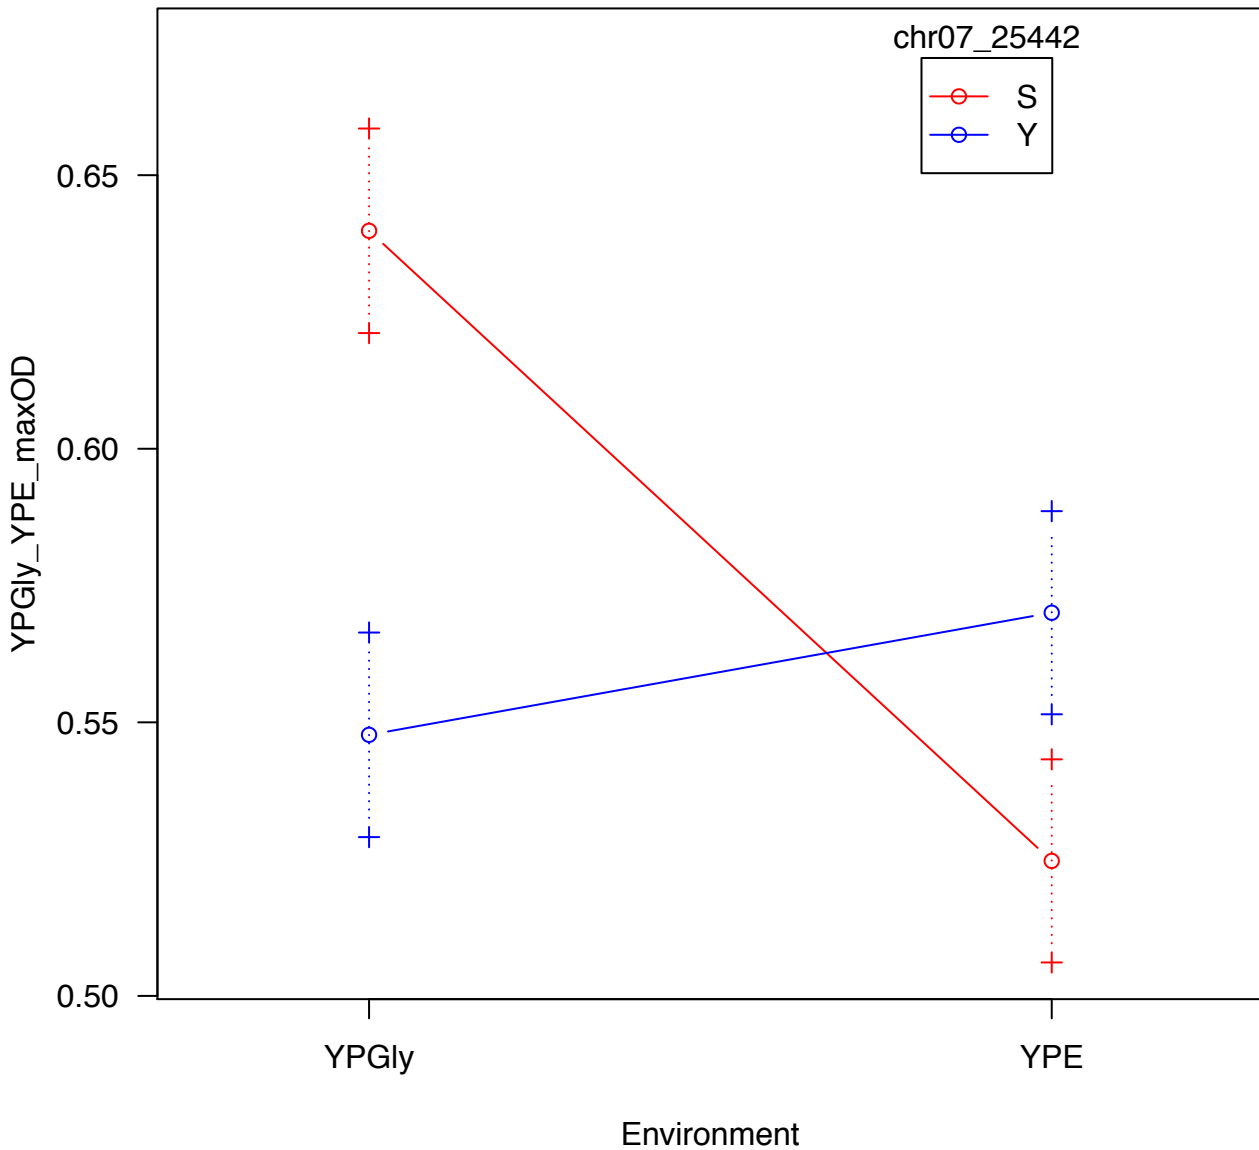

# Interaction plot for chr07\_1069000 and Environment

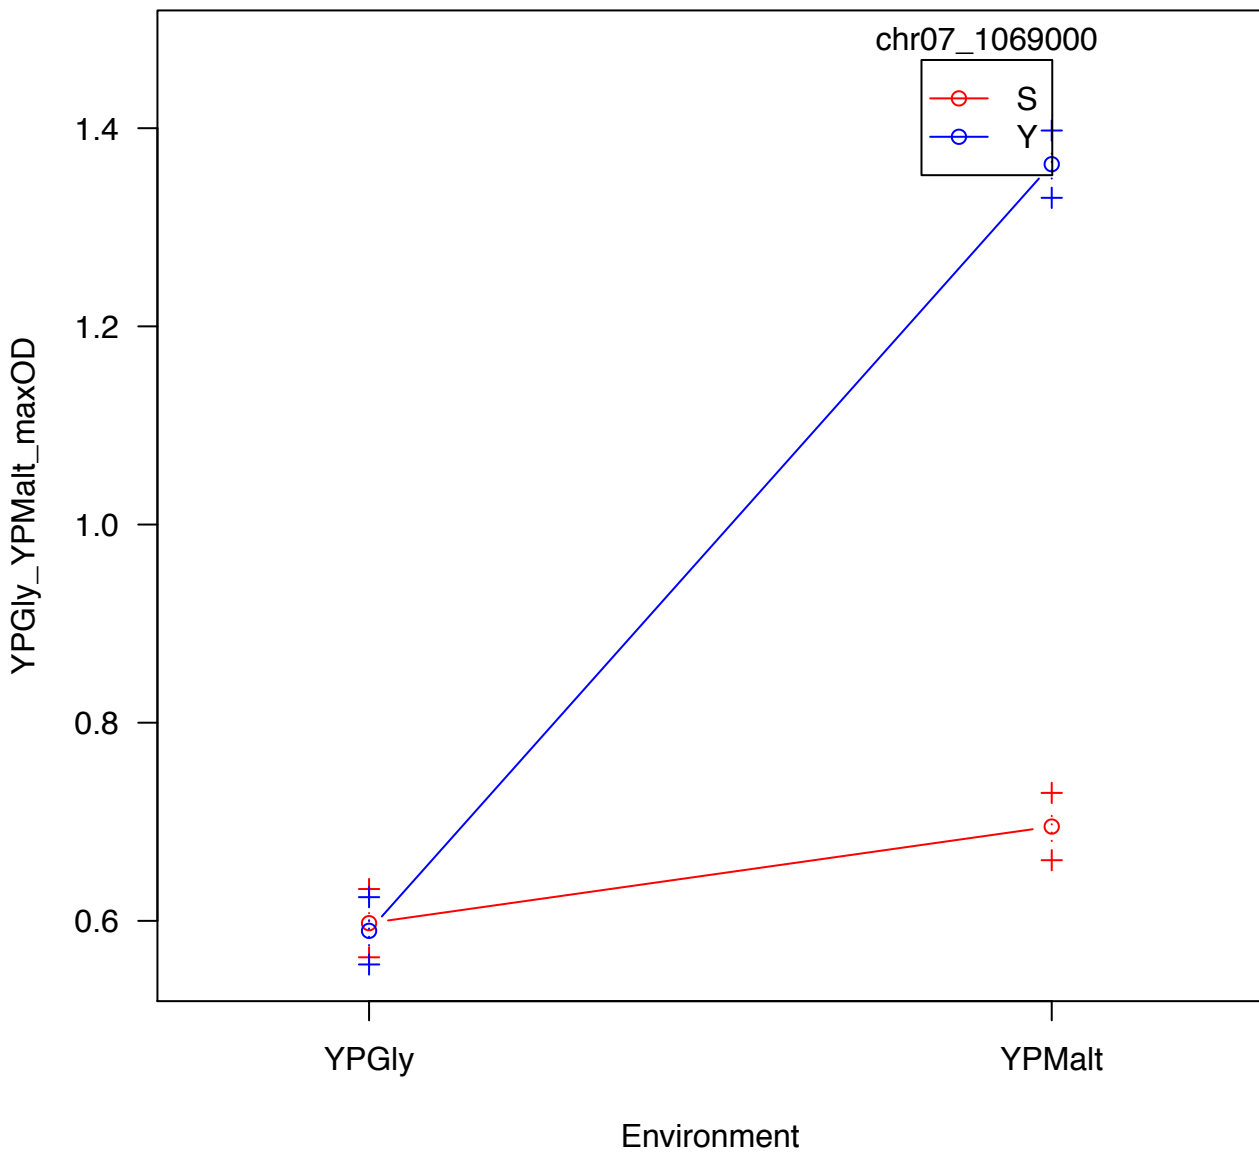

# Interaction plot for chr05\_404238 and Environment

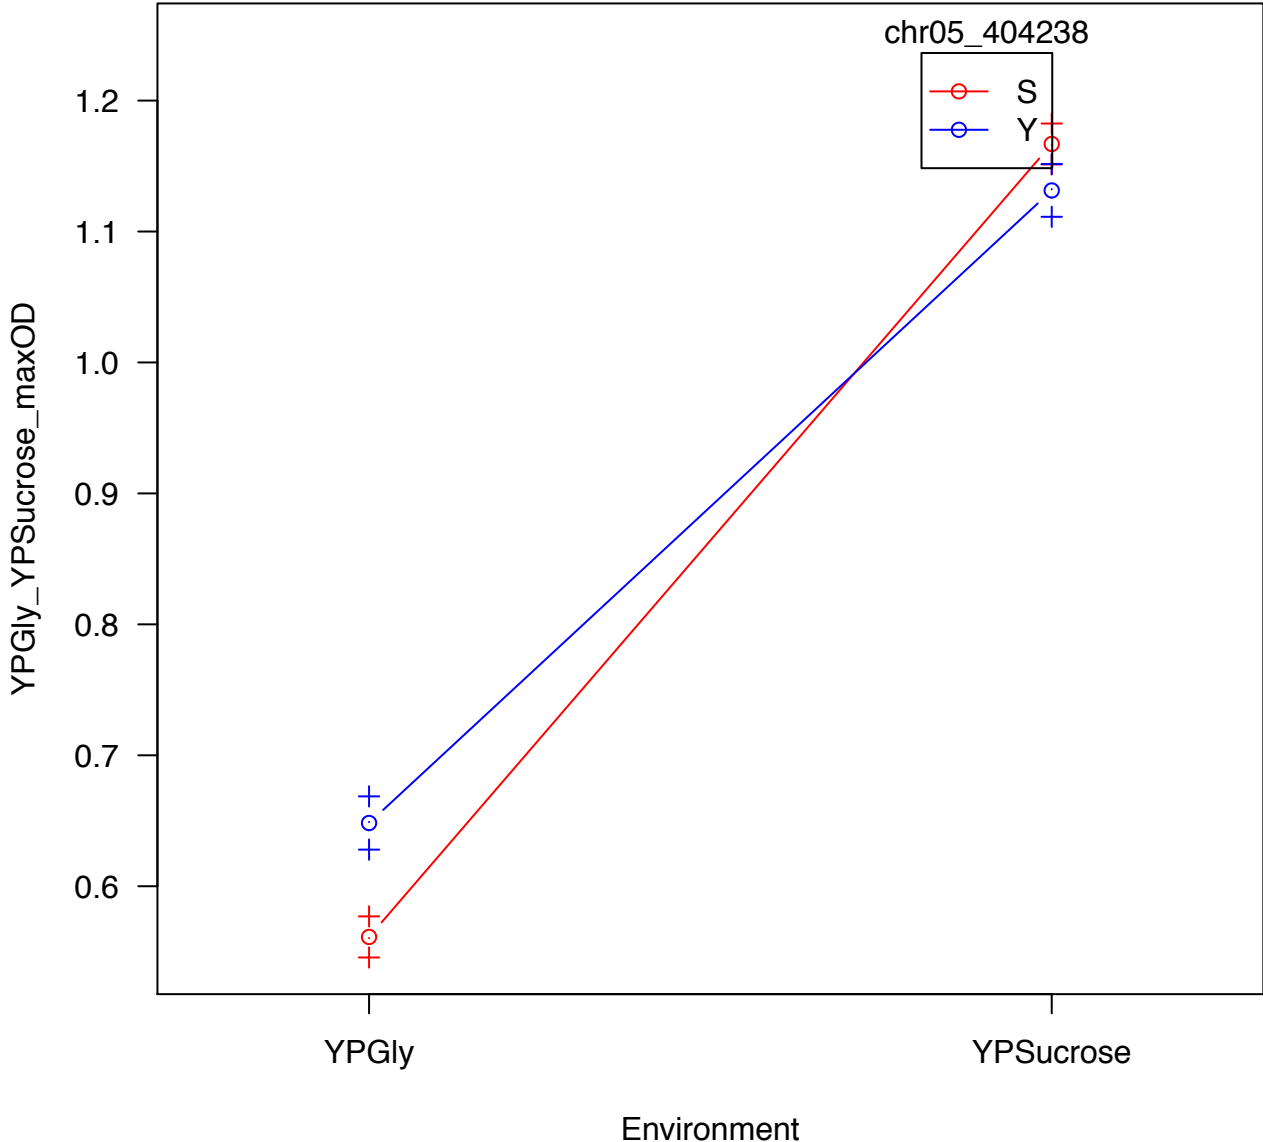



# Interaction plot for chr02\_708904 and Environment

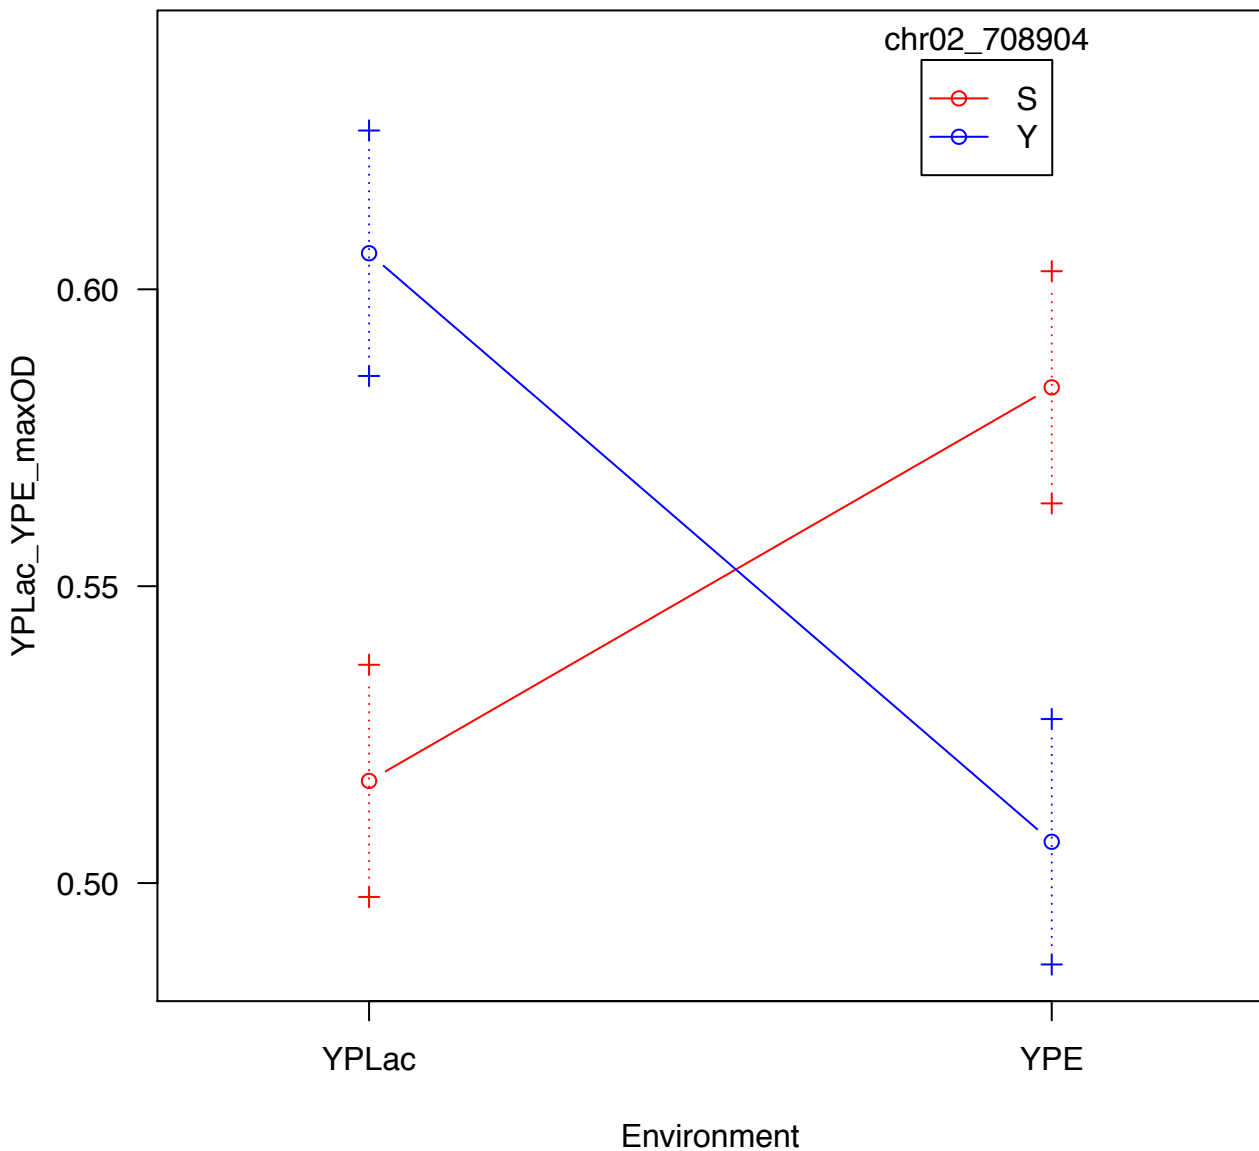

# Interaction plot for chr04\_1269959 and Environment

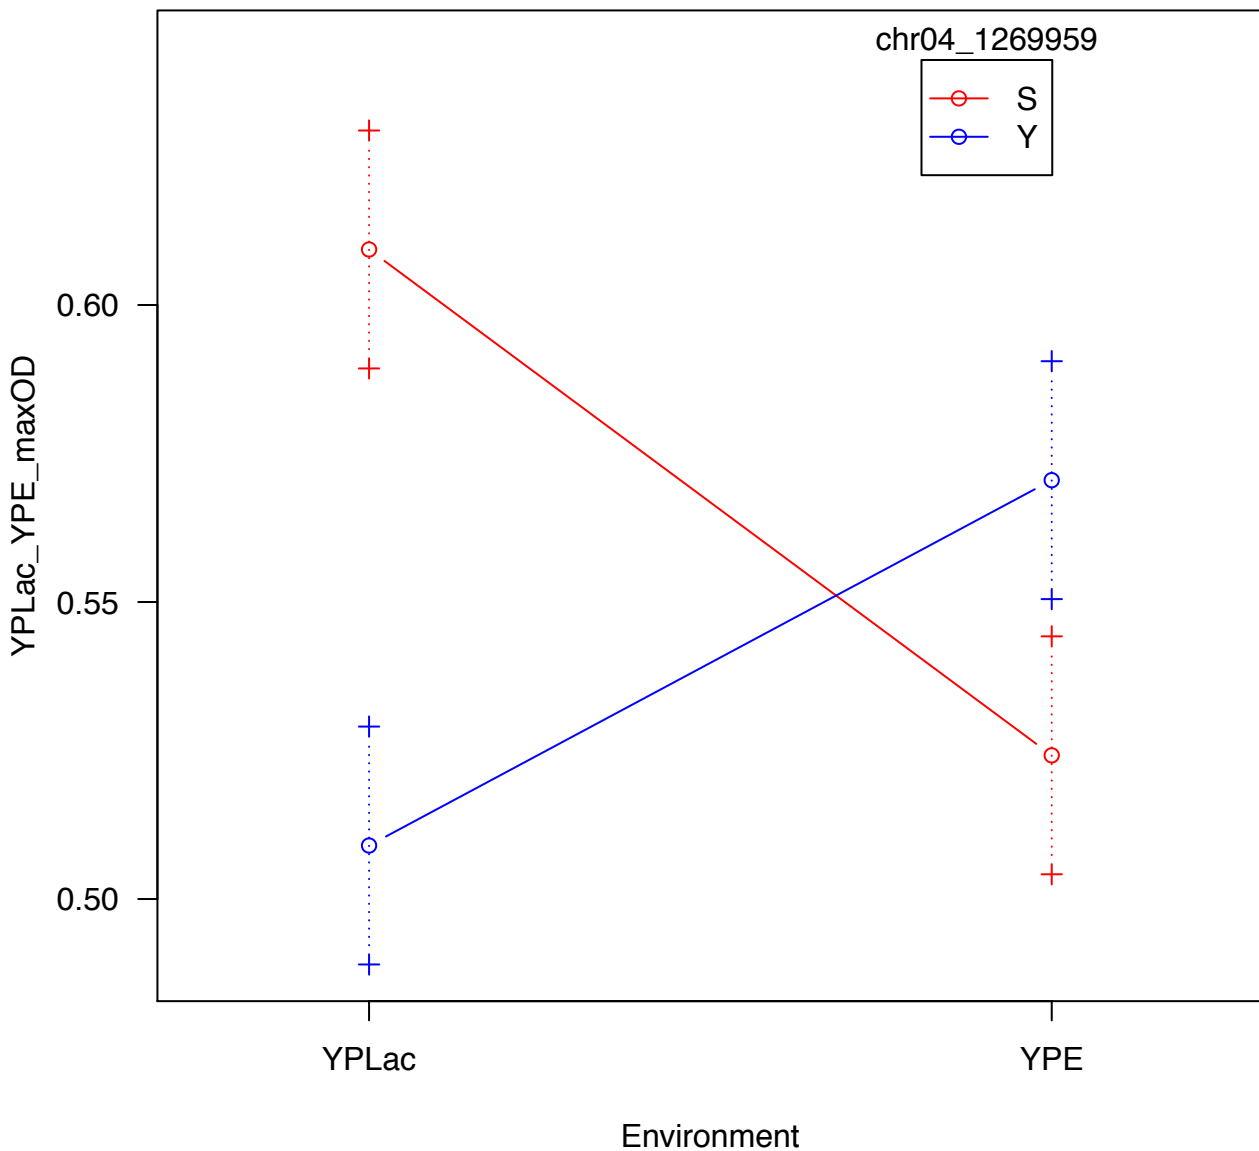

# Interaction plot for chr16\_295943 and Environment

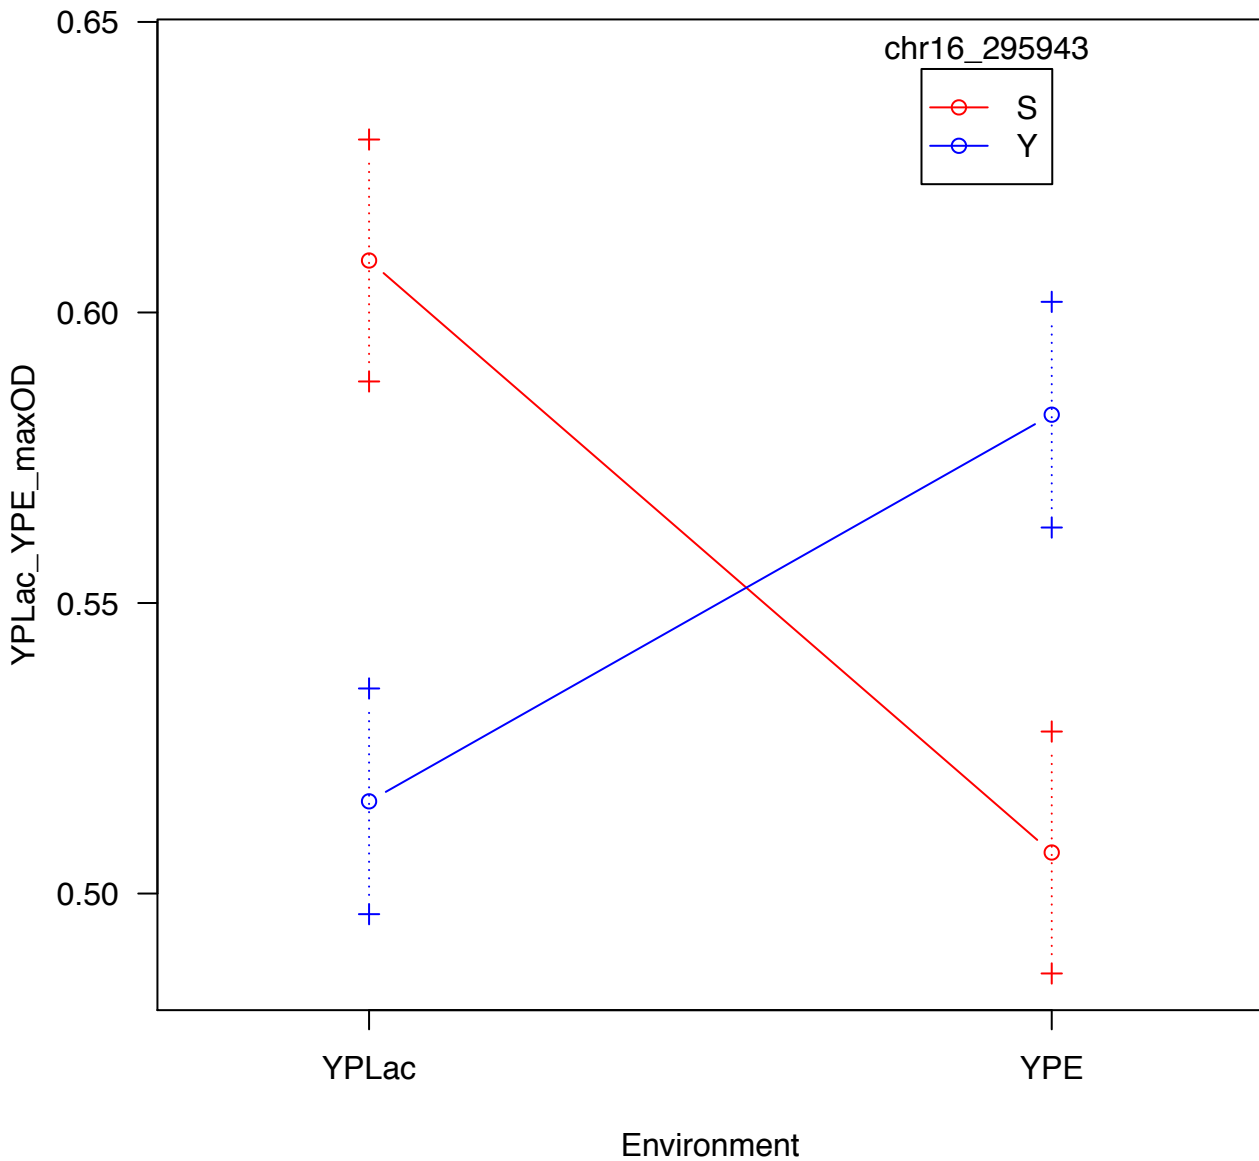

# Interaction plot for chr14\_467221 and Environment

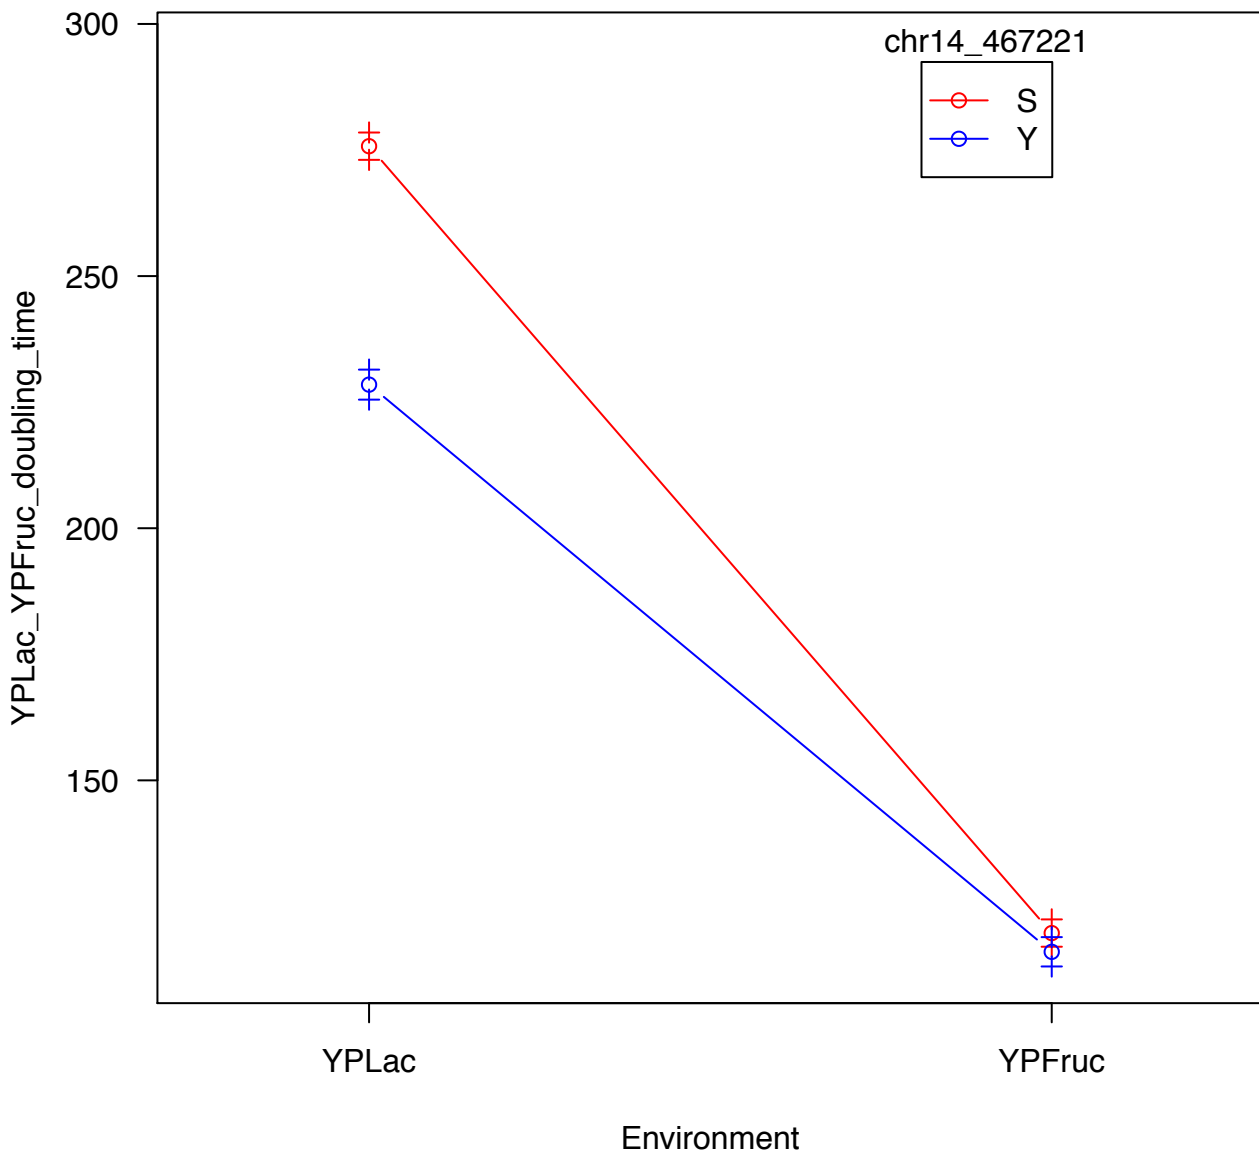

# Interaction plot for chr07\_1069012 and Environment

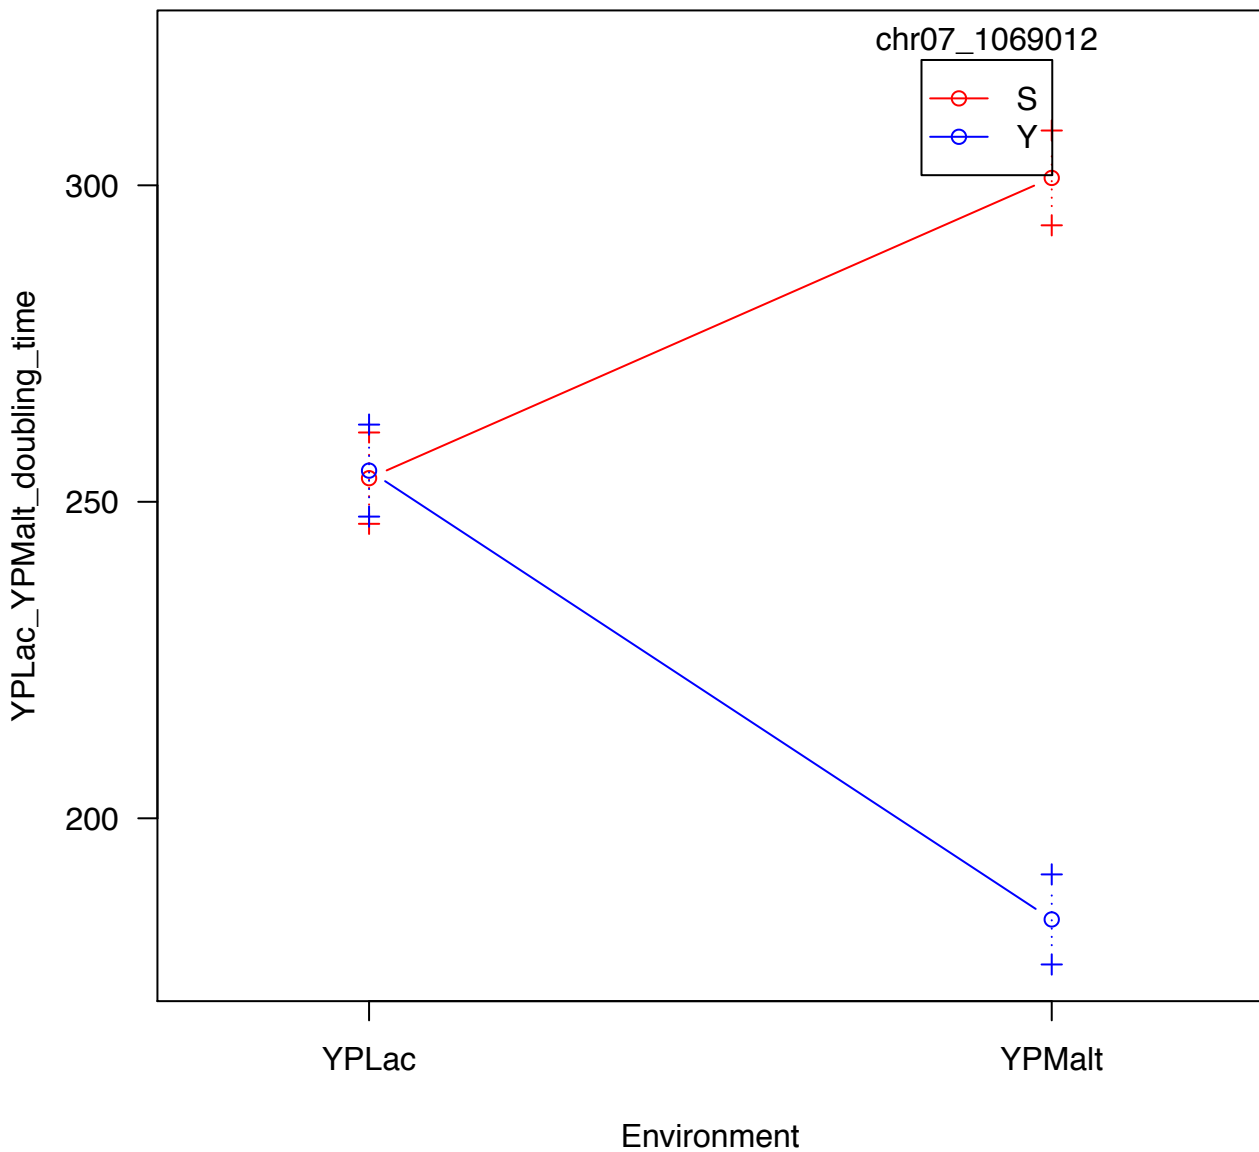

# Interaction plot for chr03\_55716 and Environment

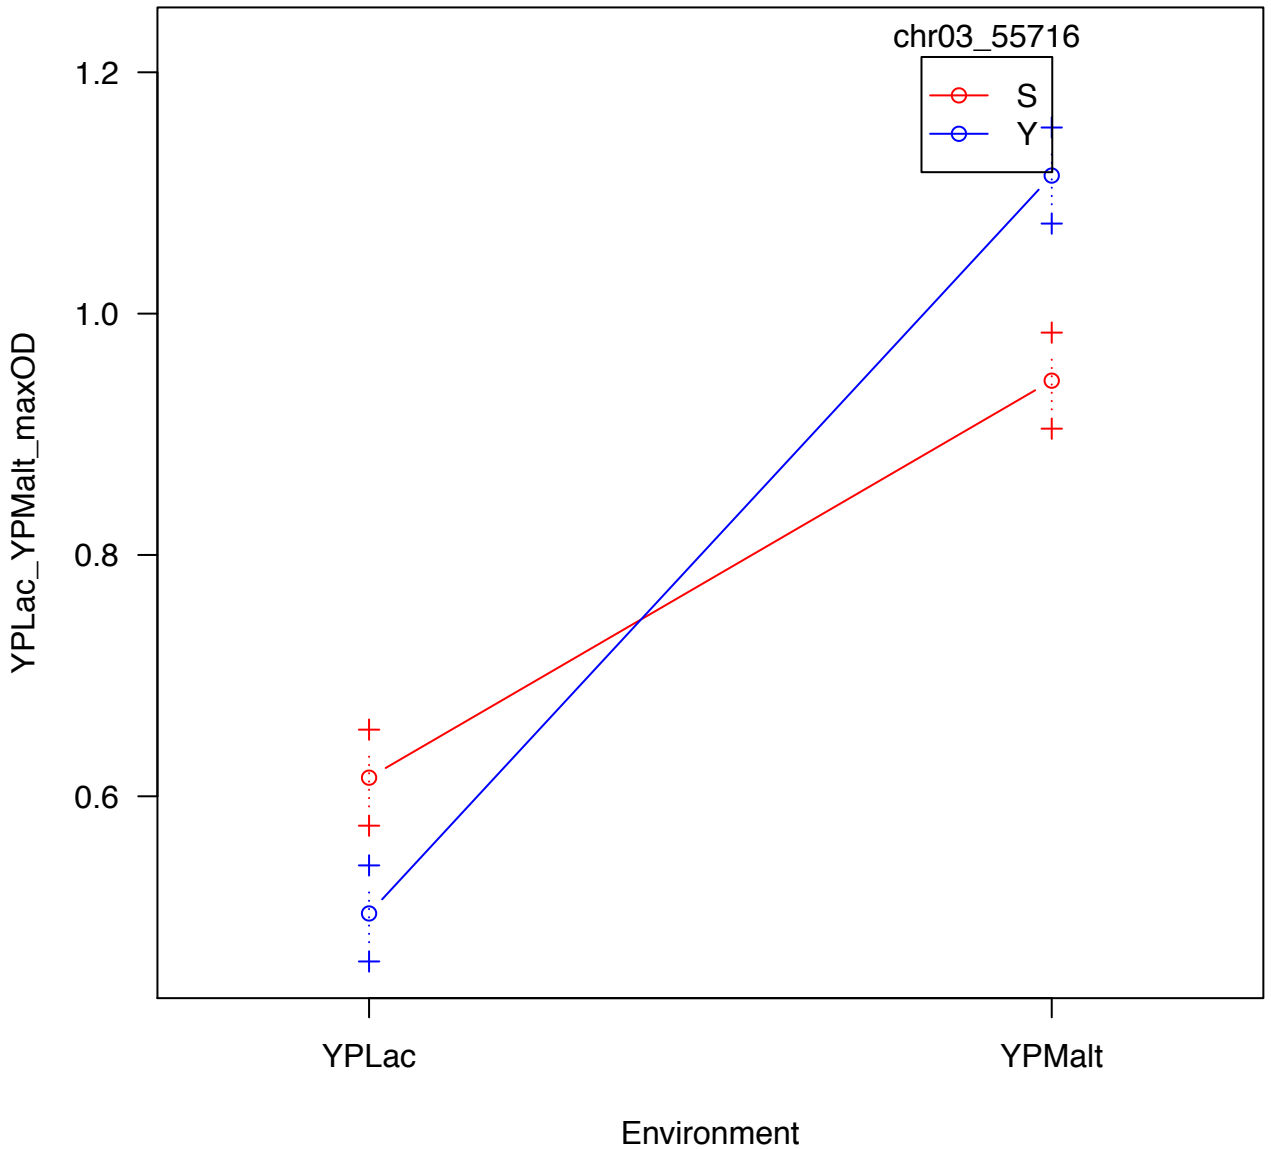

# Interaction plot for chr07\_1069012 and Environment

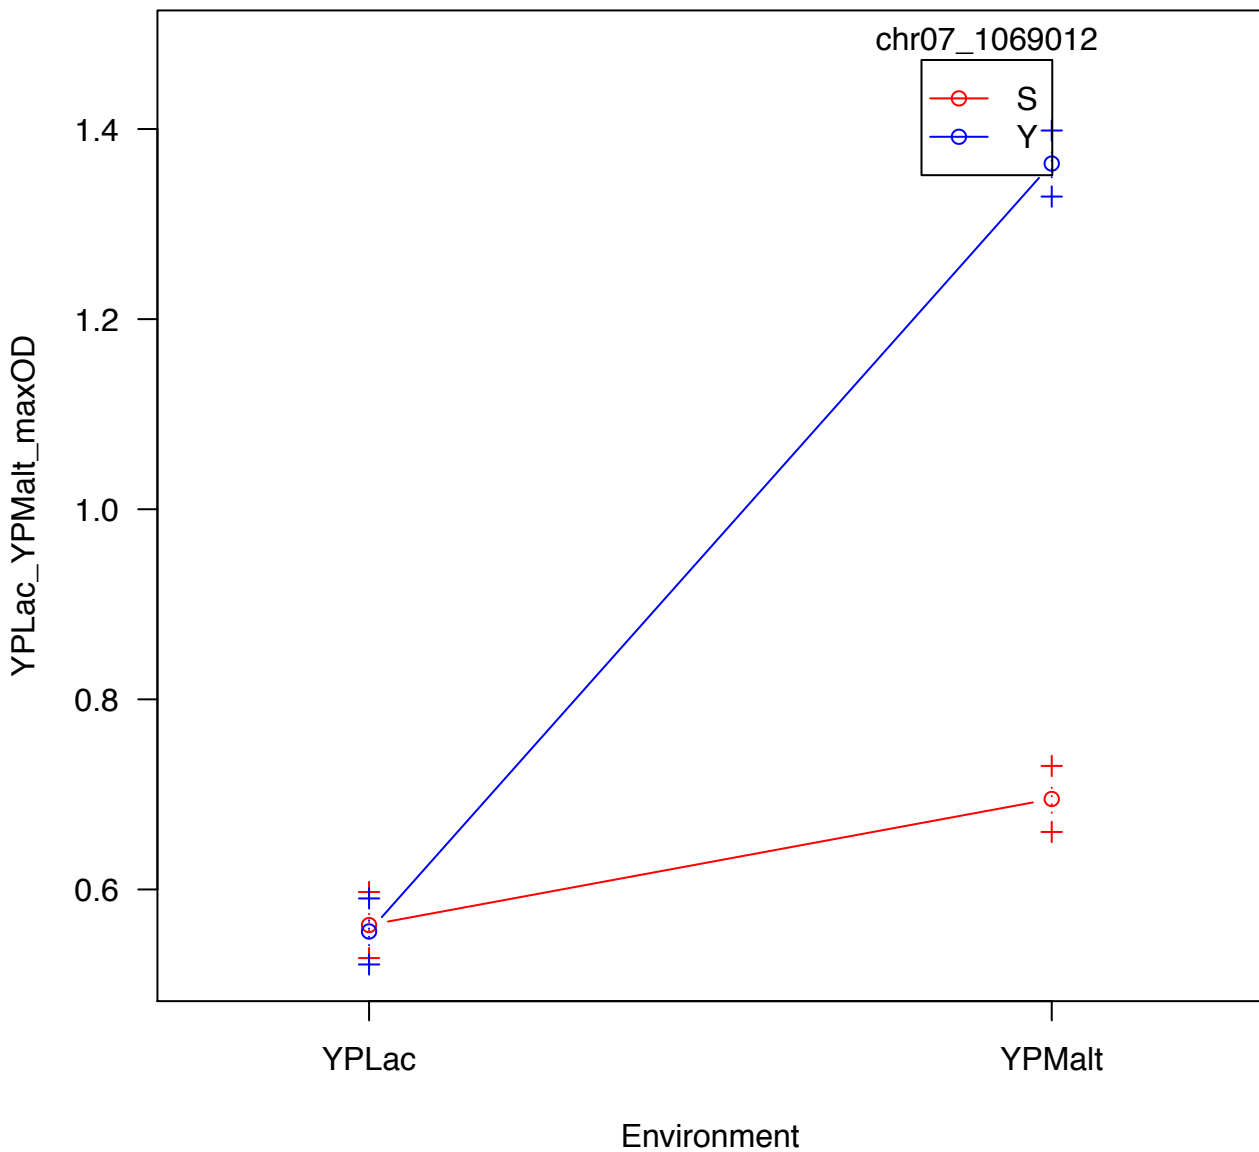

# Interaction plot for chr14\_468490 and Environment

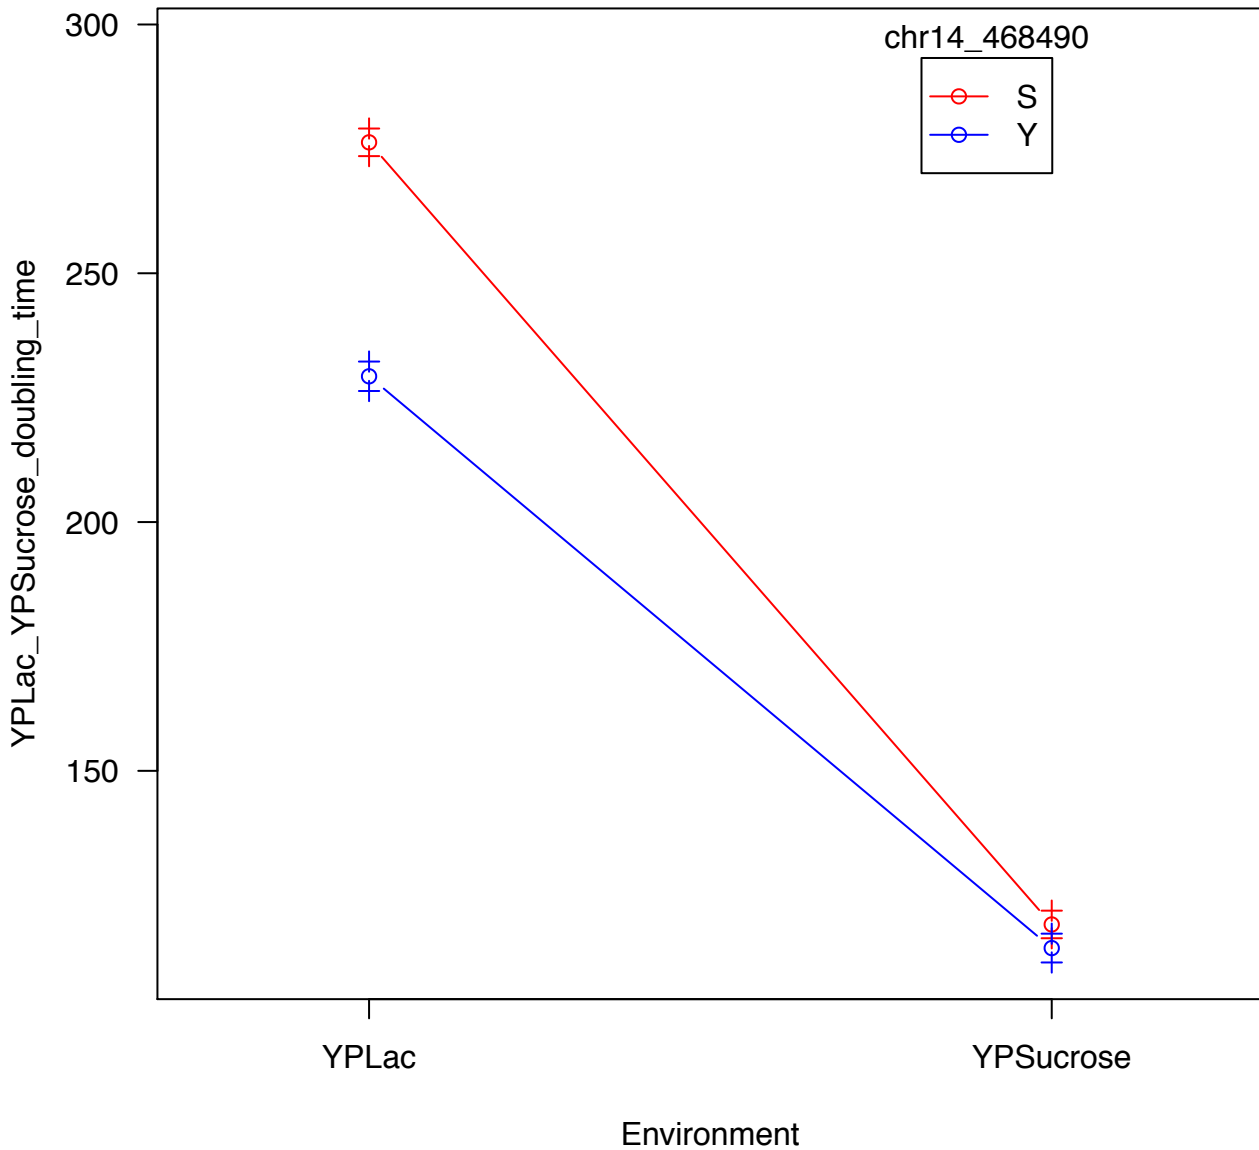



# Interaction plot for chr02\_708947 and Environment

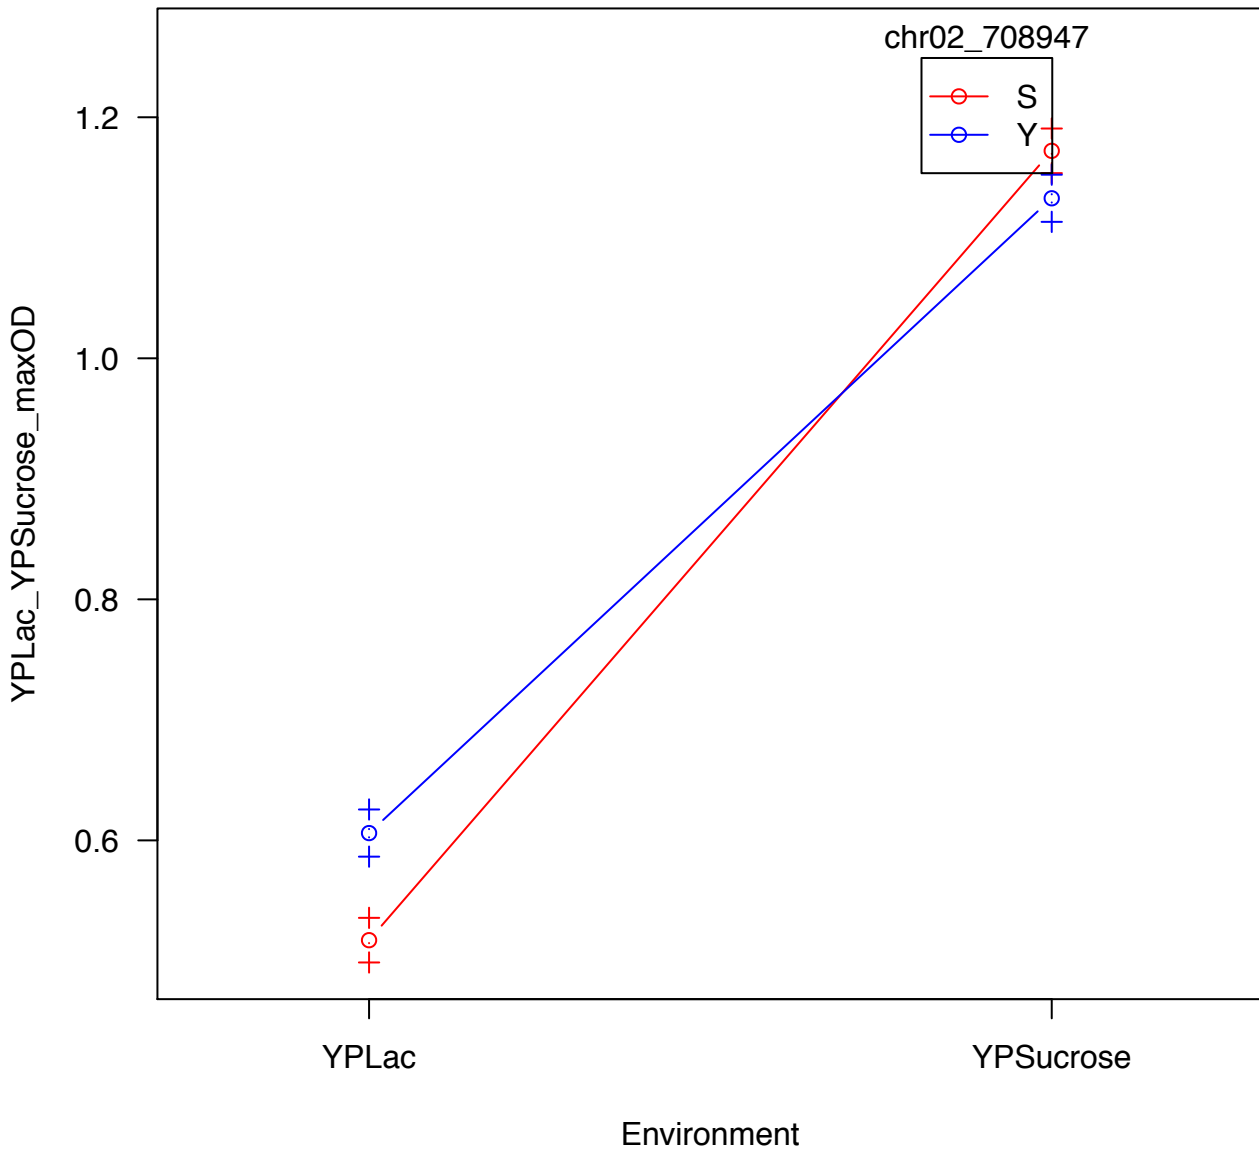

# Interaction plot for chr16\_342268 and Environment

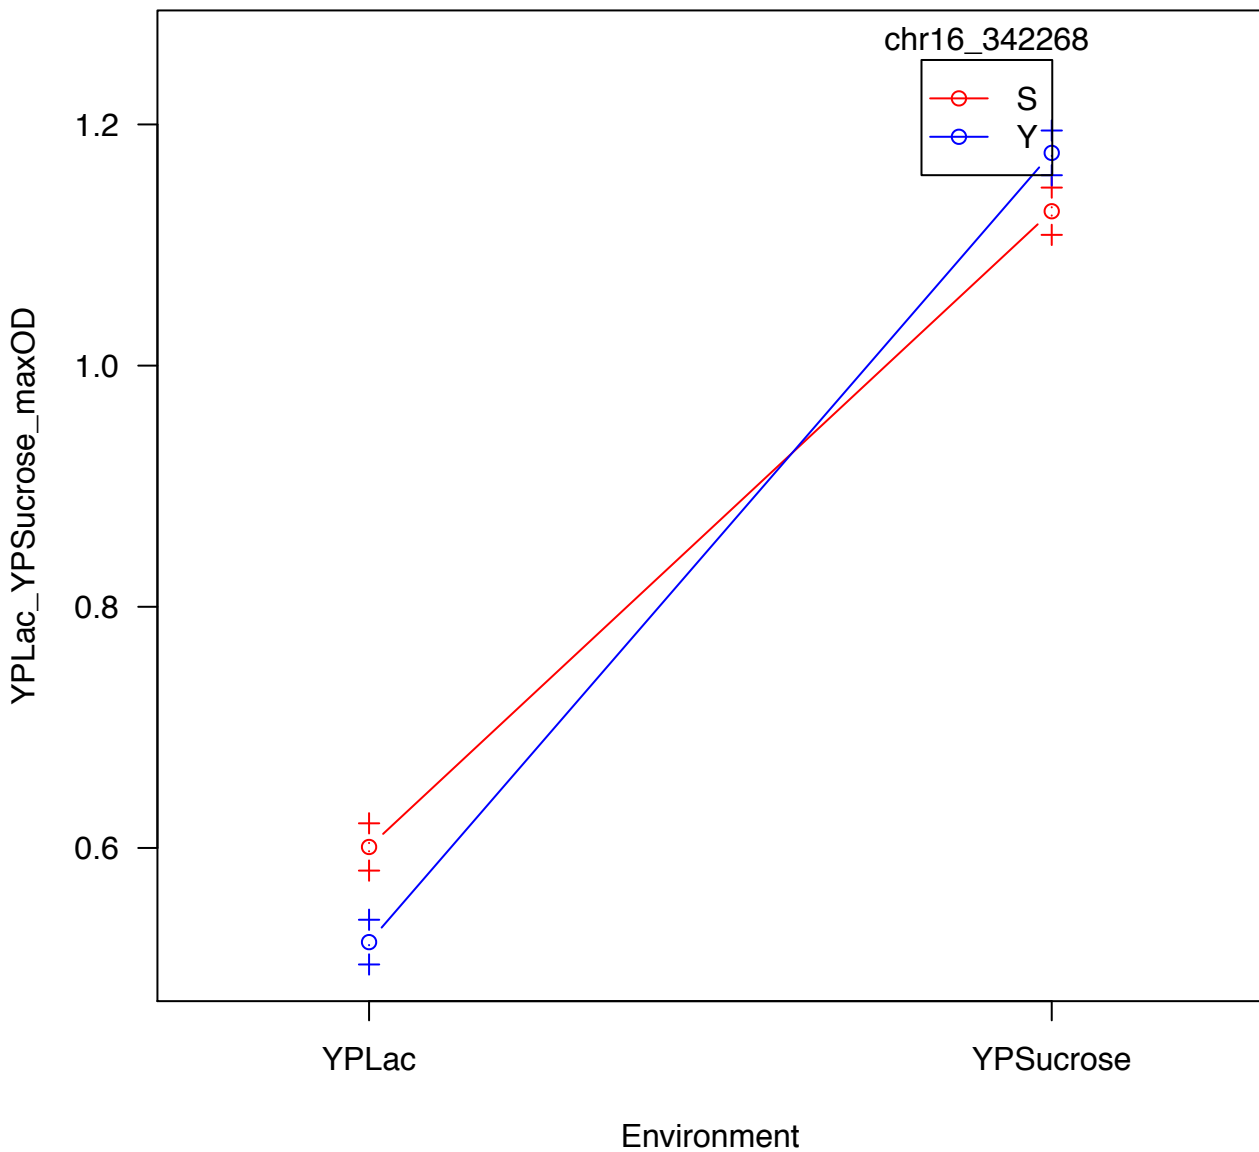

# Interaction plot for chr07\_1069012 and Environment

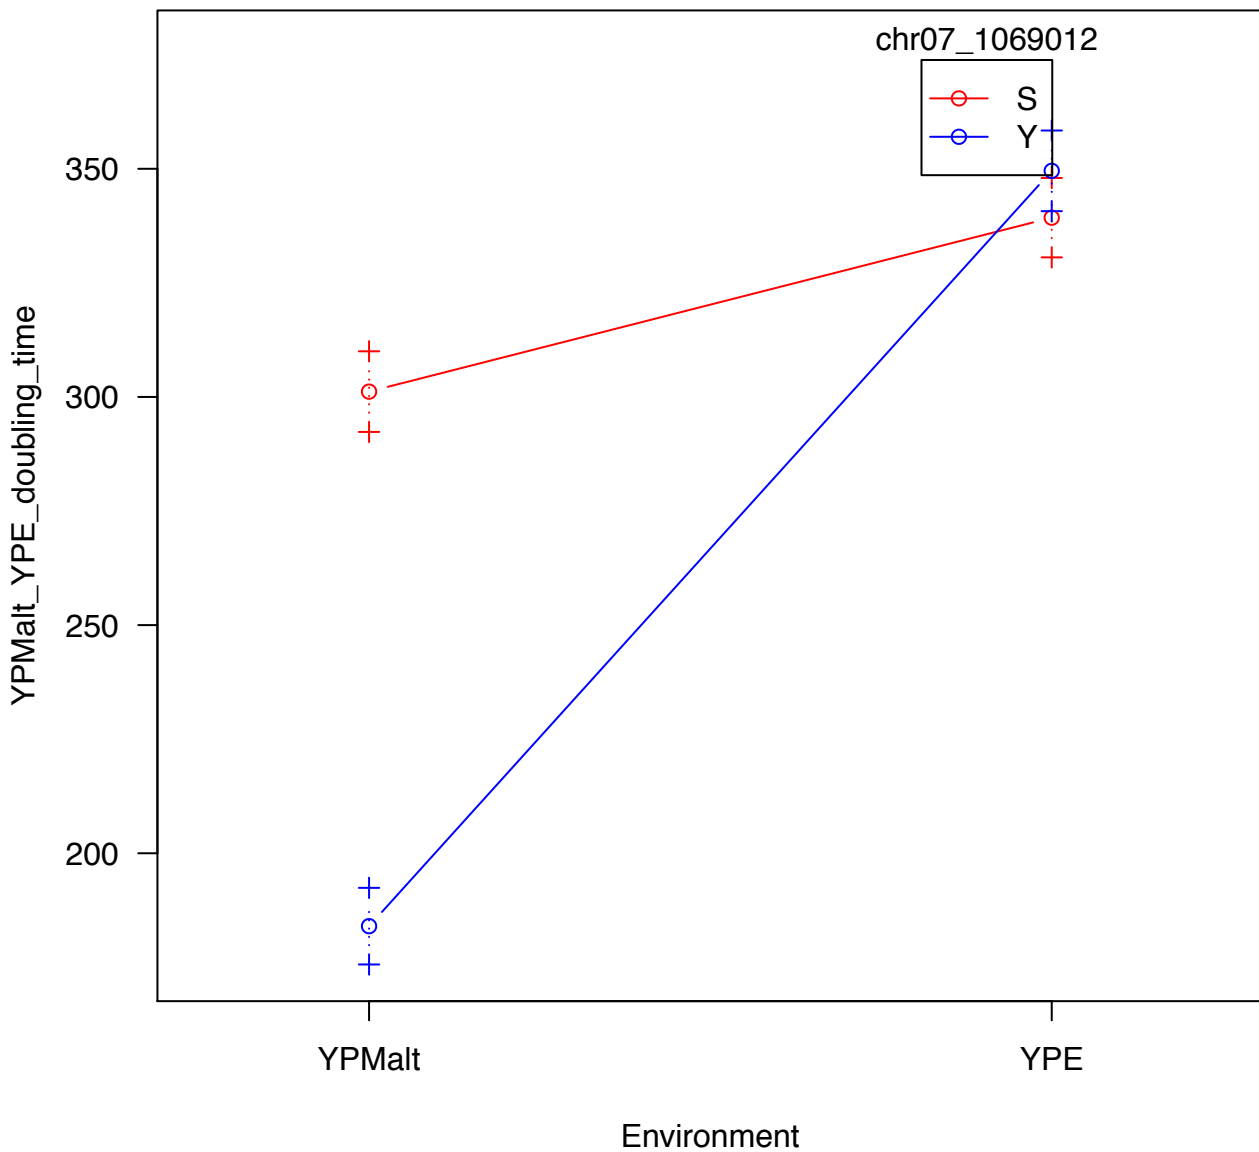

# Interaction plot for chr07\_1069000 and Environment

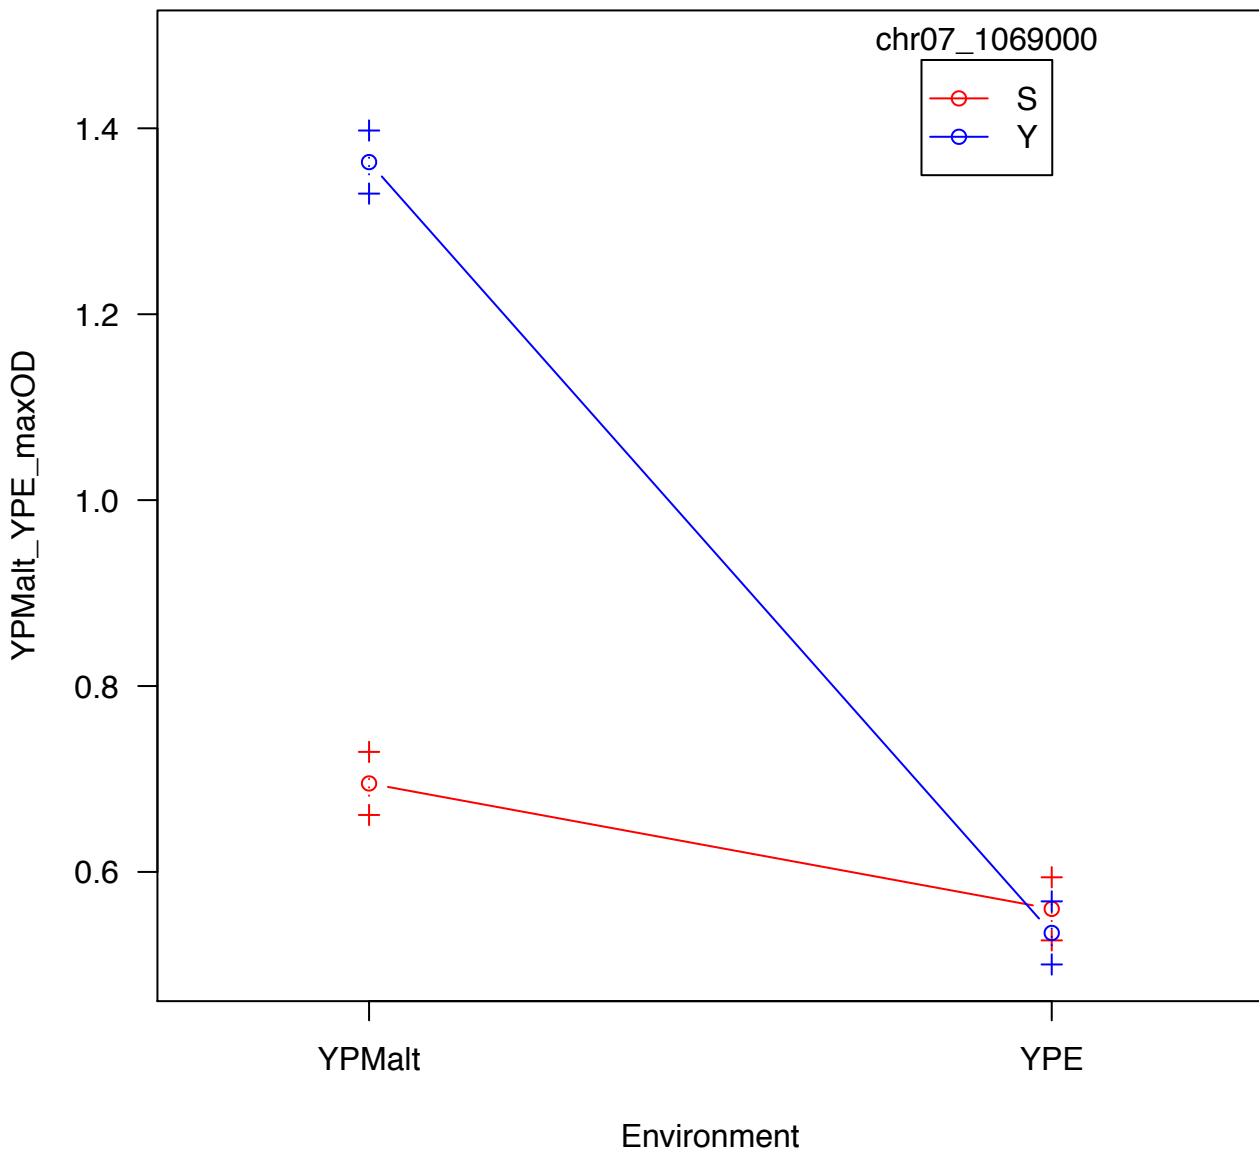

# Interaction plot for chr07\_1069012 and Environment

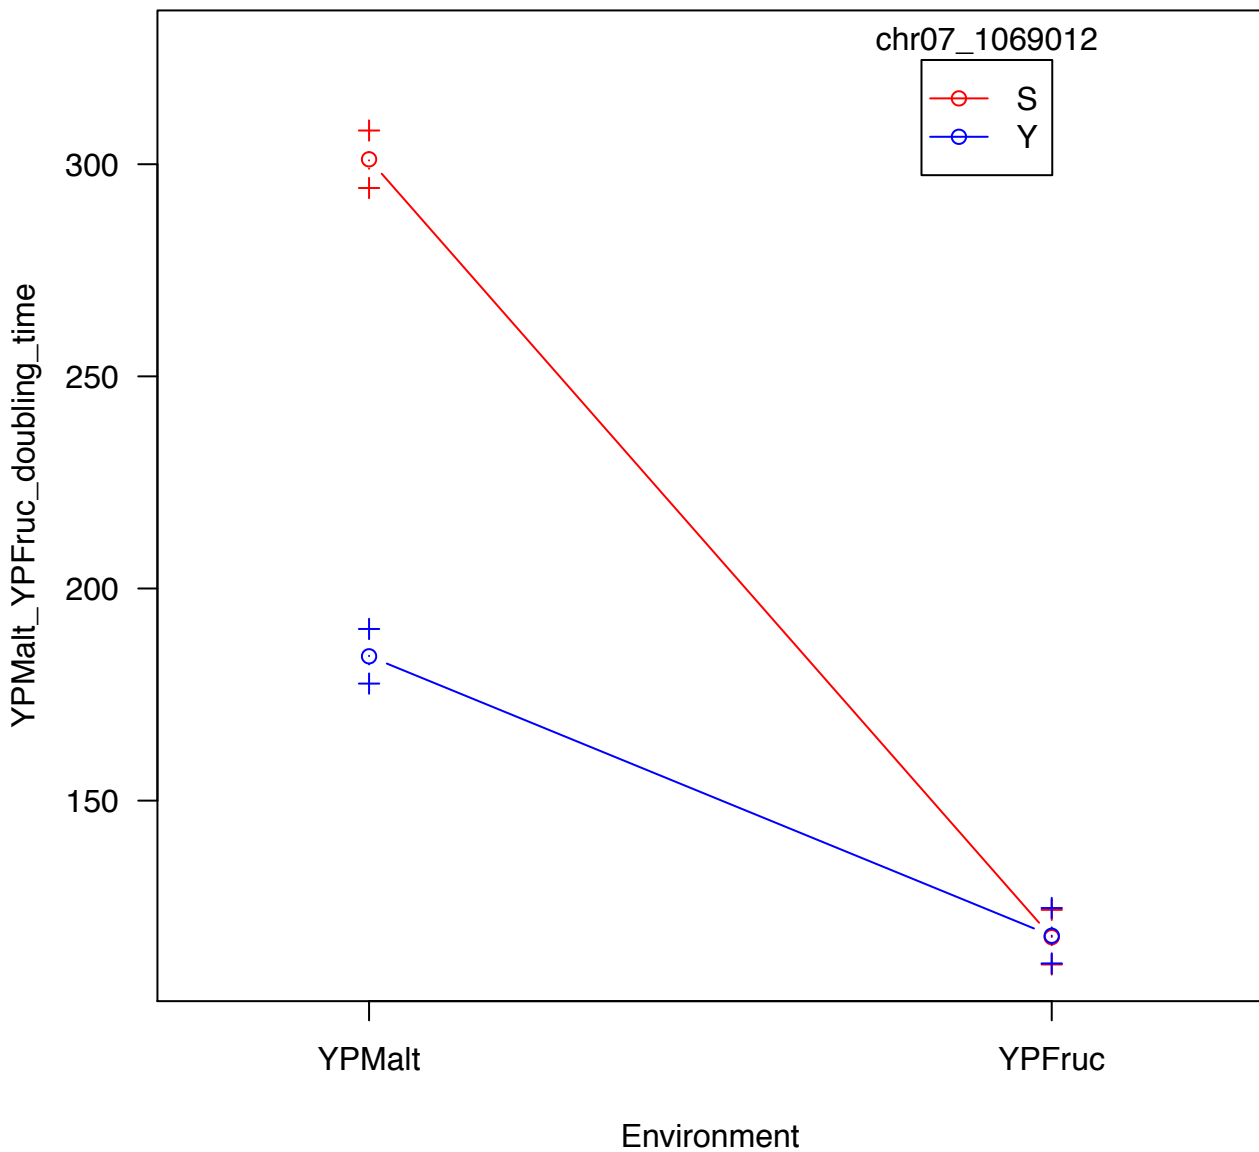

# Interaction plot for chr15\_656568 and Environment

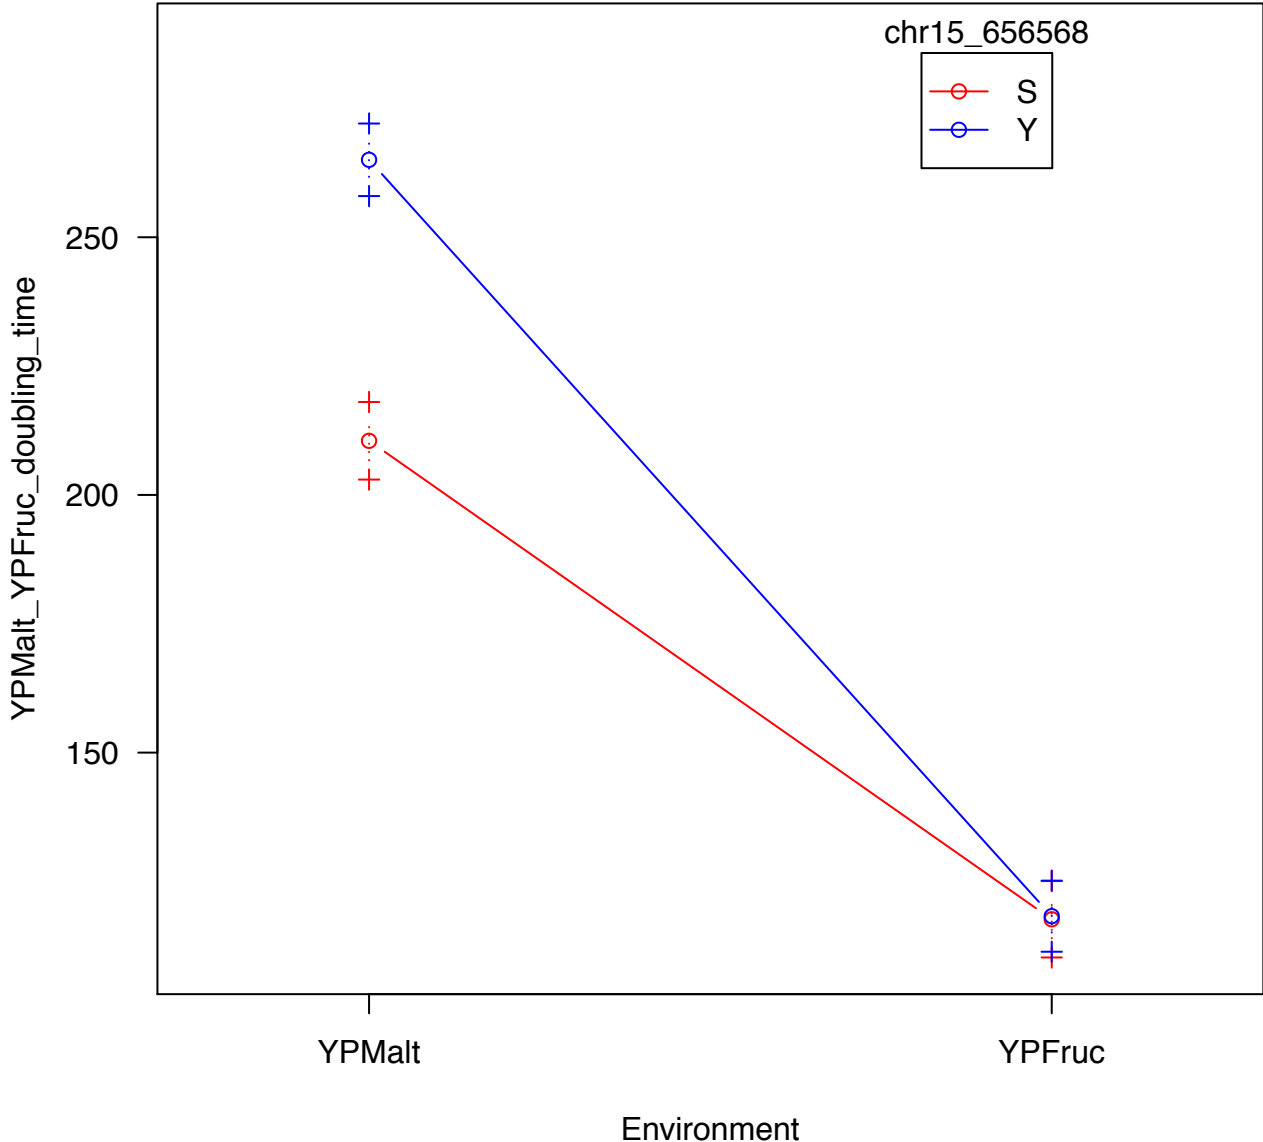

# Interaction plot for chr03\_248850 and Environment

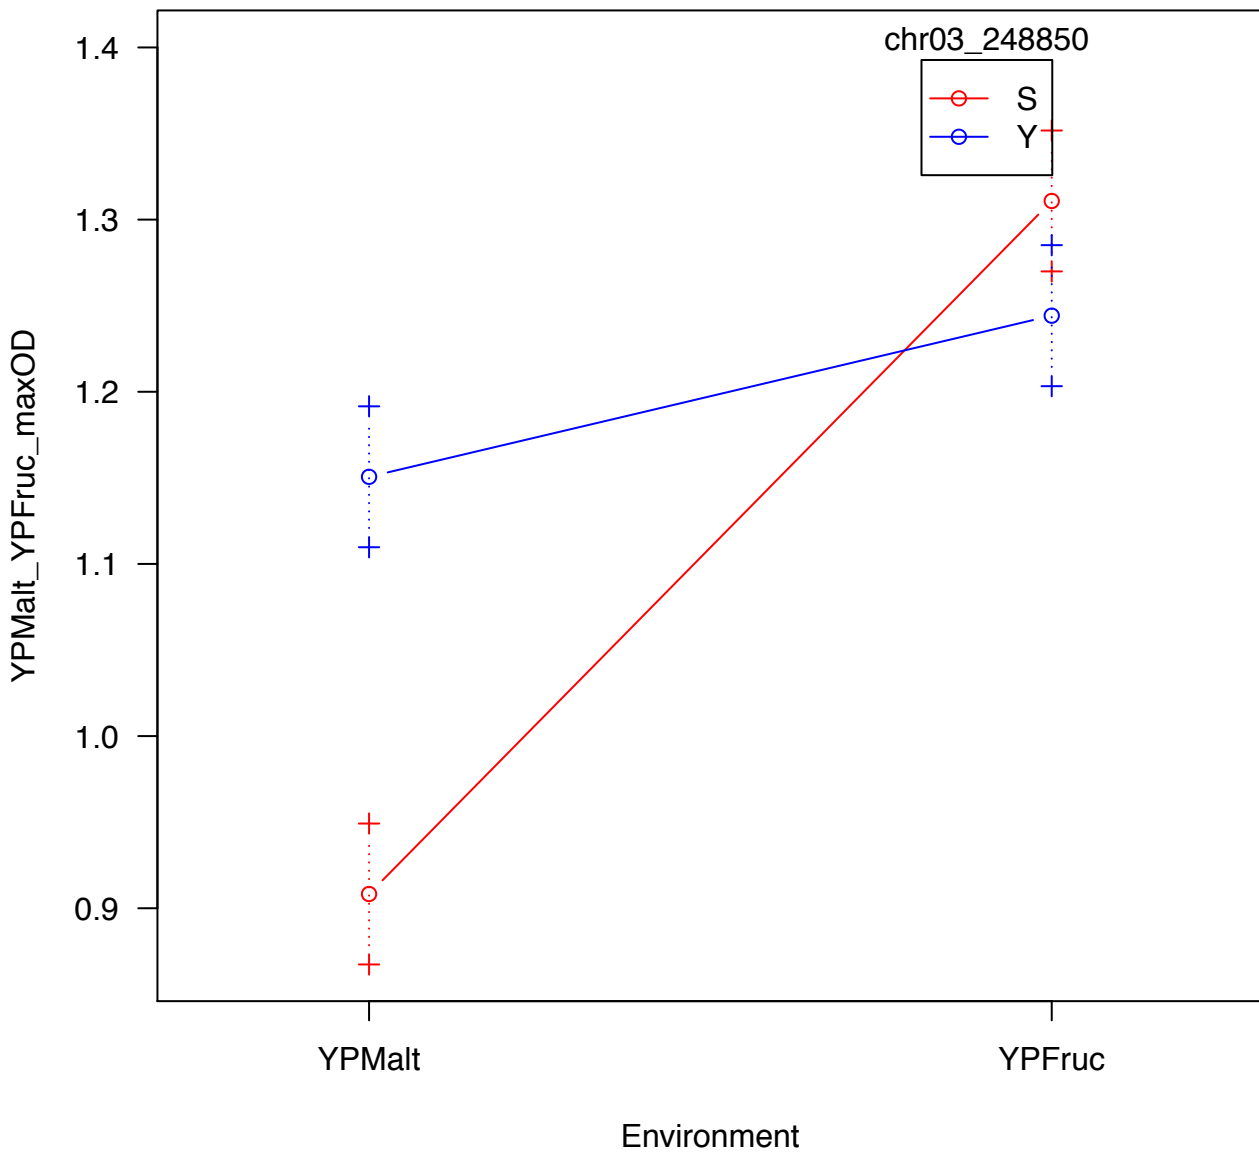

# Interaction plot for chr07\_1069012 and Environment

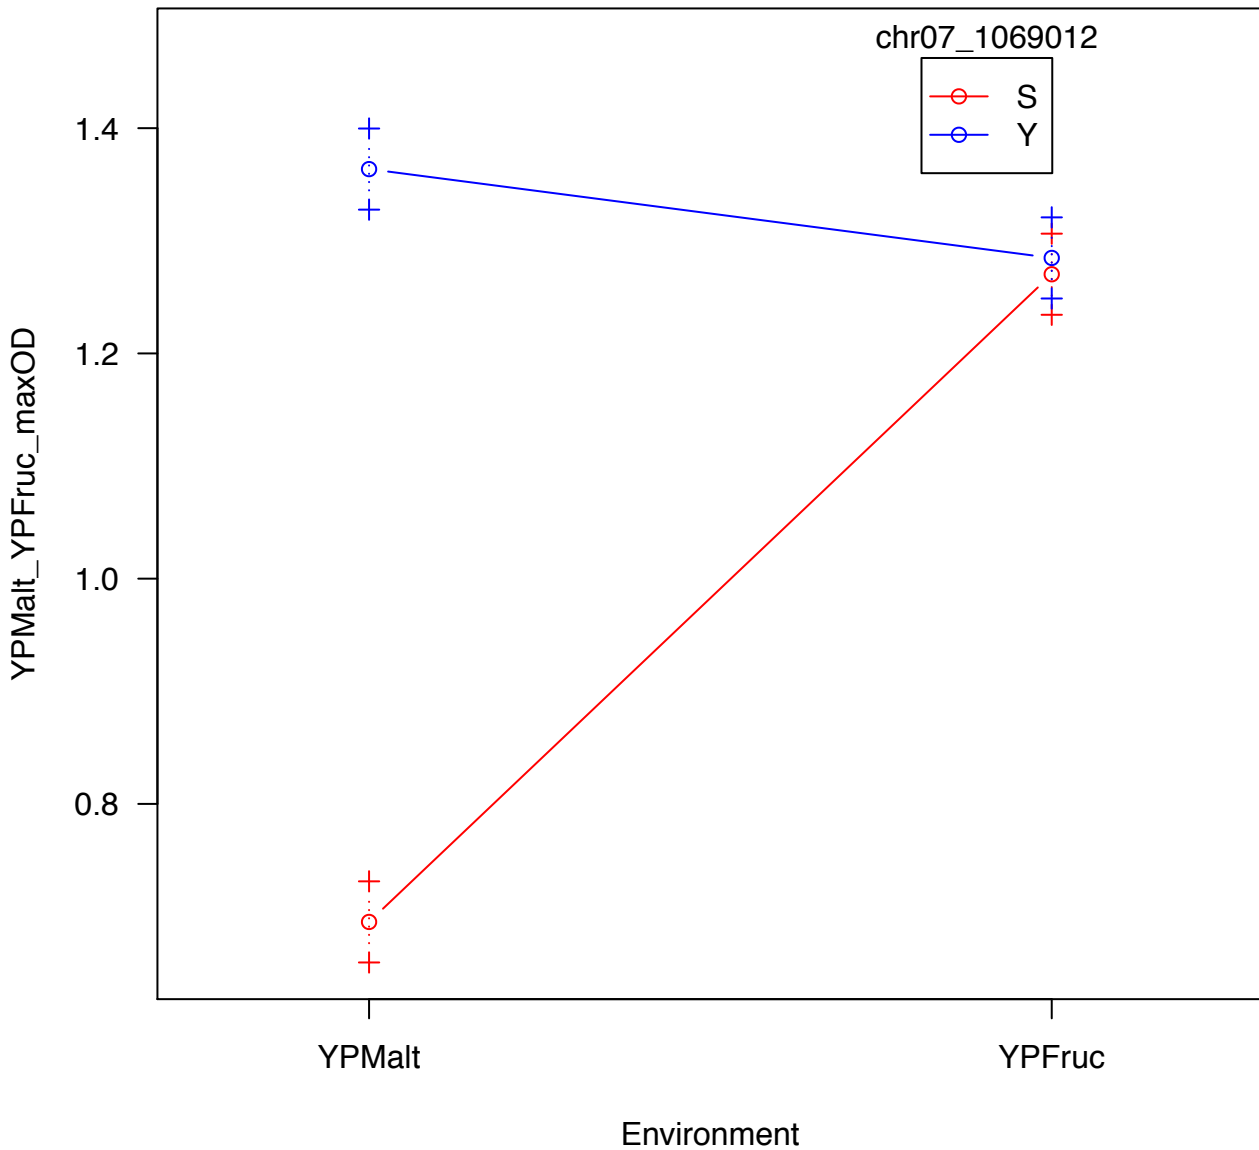



# Interaction plot for chr15\_288114 and Environment

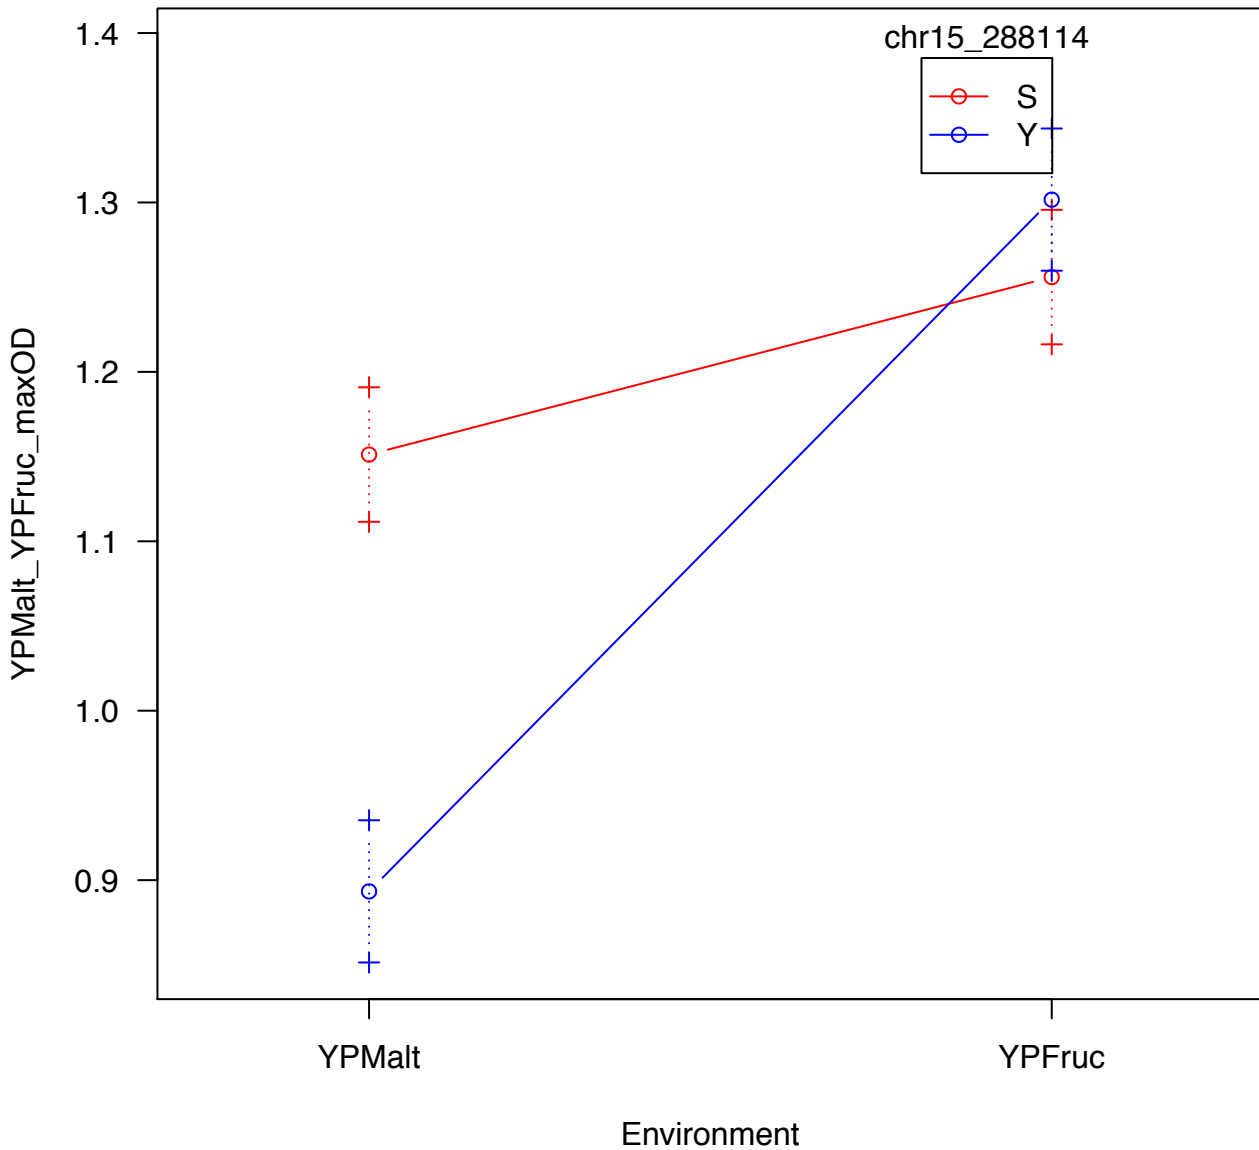

# Interaction plot for chr07\_1069012 and Environment

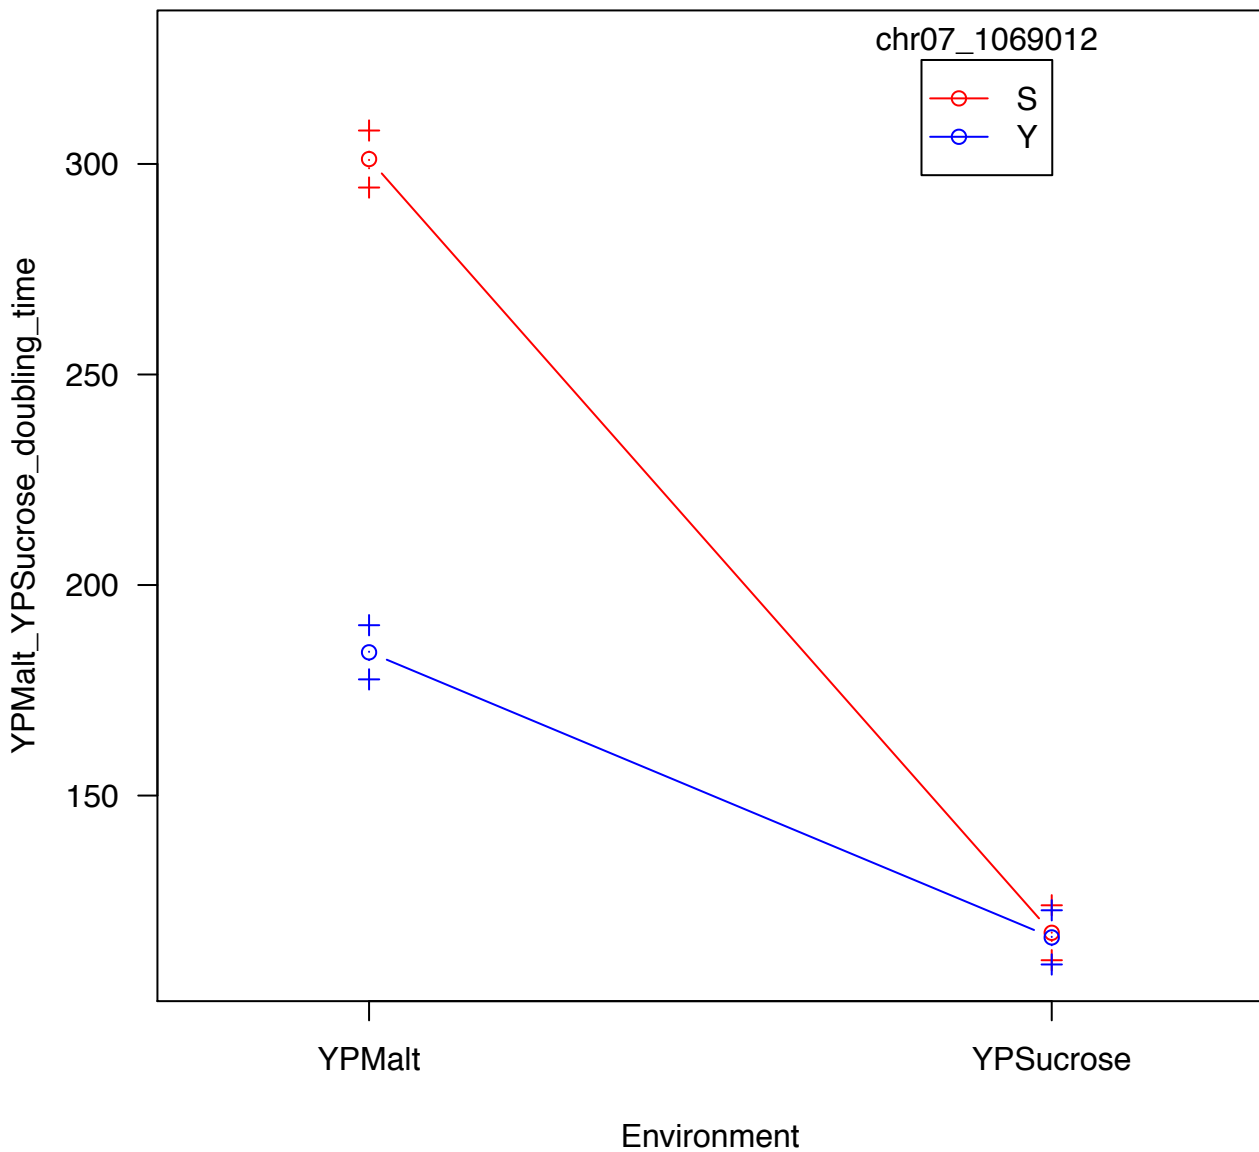

# Interaction plot for chr15\_656568 and Environment

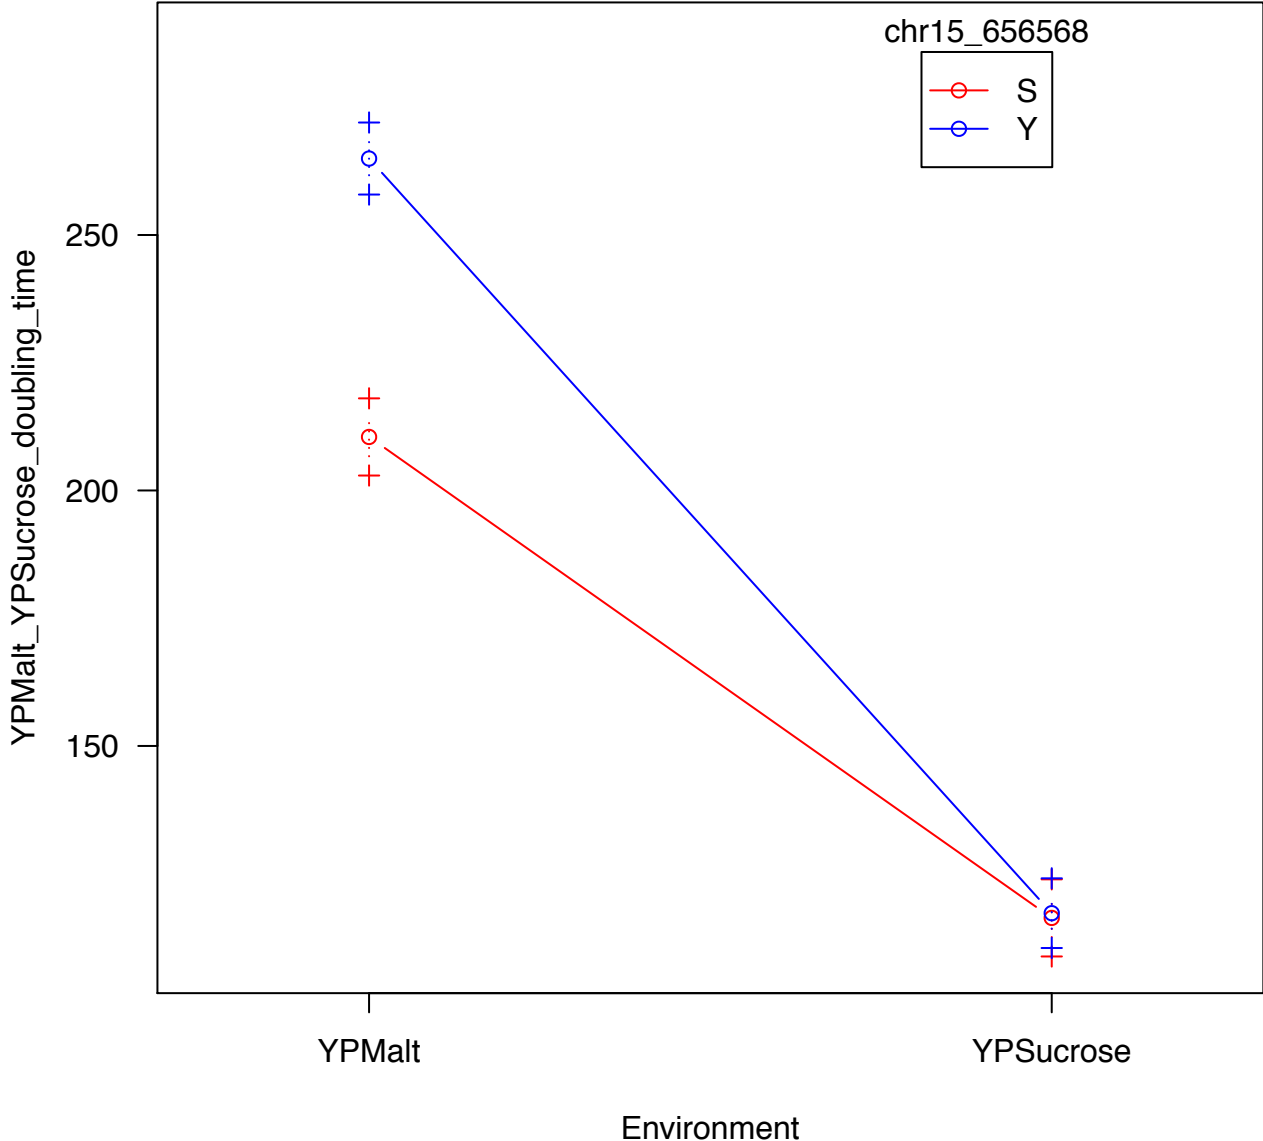

# Interaction plot for chr07\_1069000 and Environment

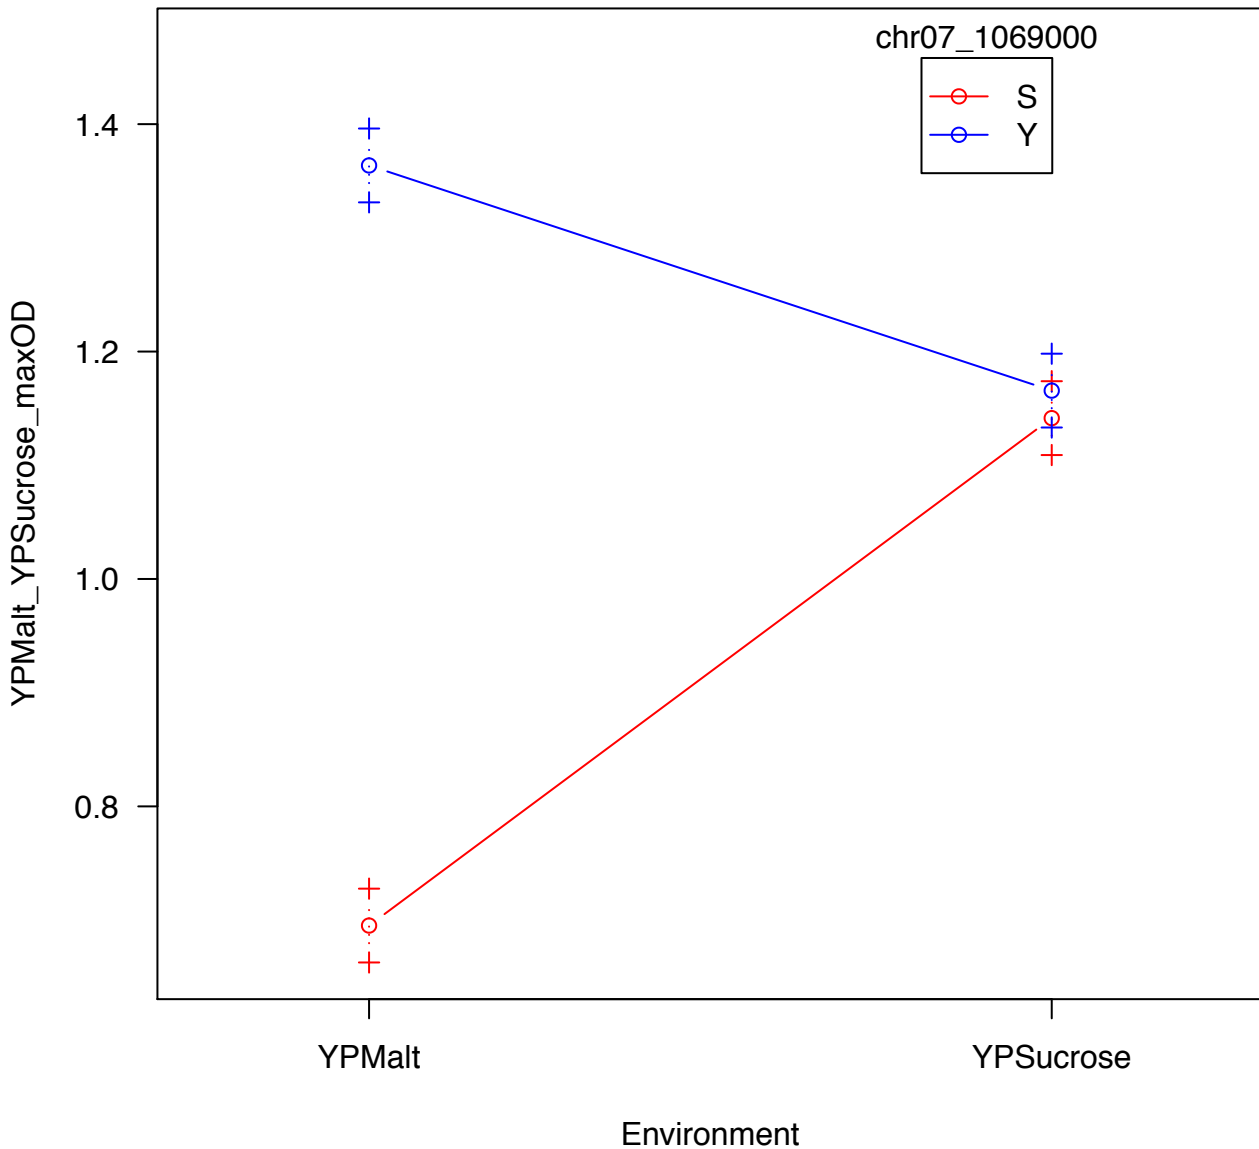

# Interaction plot for chr05\_371899 and Environment

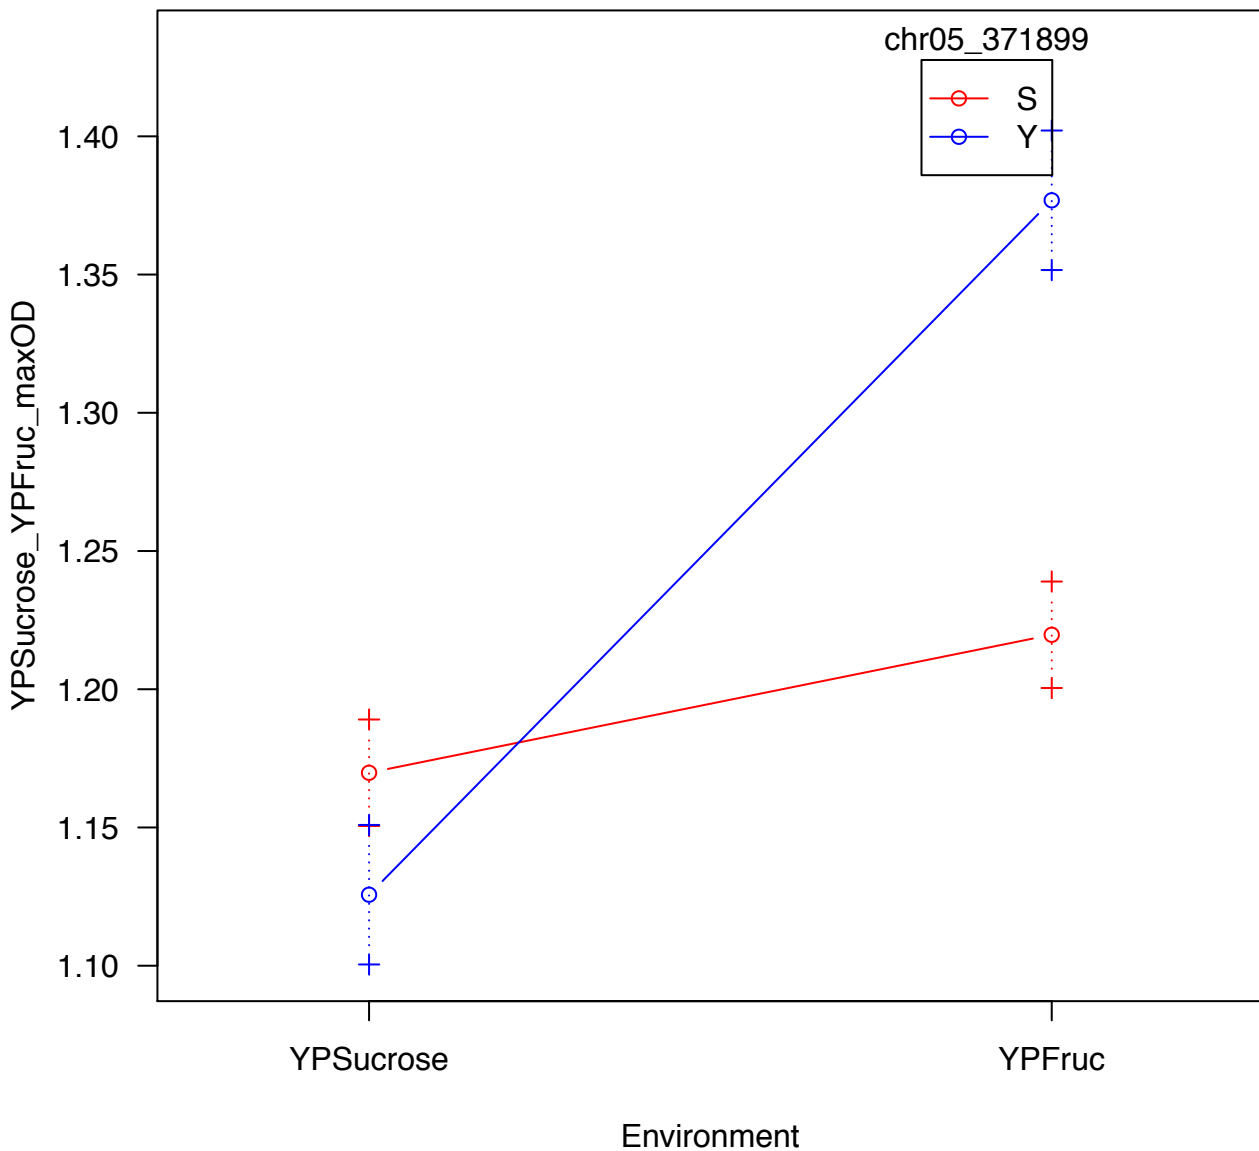

Supplement: supp_g3.113.009142_FigureS2.pdf [file supp_g3.113.009142_FigureS2.pdf]
