# Supplementary material for: Yeast Growth Plasticity Is Regulated by Environment-Specific Multi-QTL Interactions
Source: PubMed Central journal article supplement (PMC4025475; doi:10.1534/g3.113.009142), 2014-01-28

chr05\_371899  
chr15\_653770

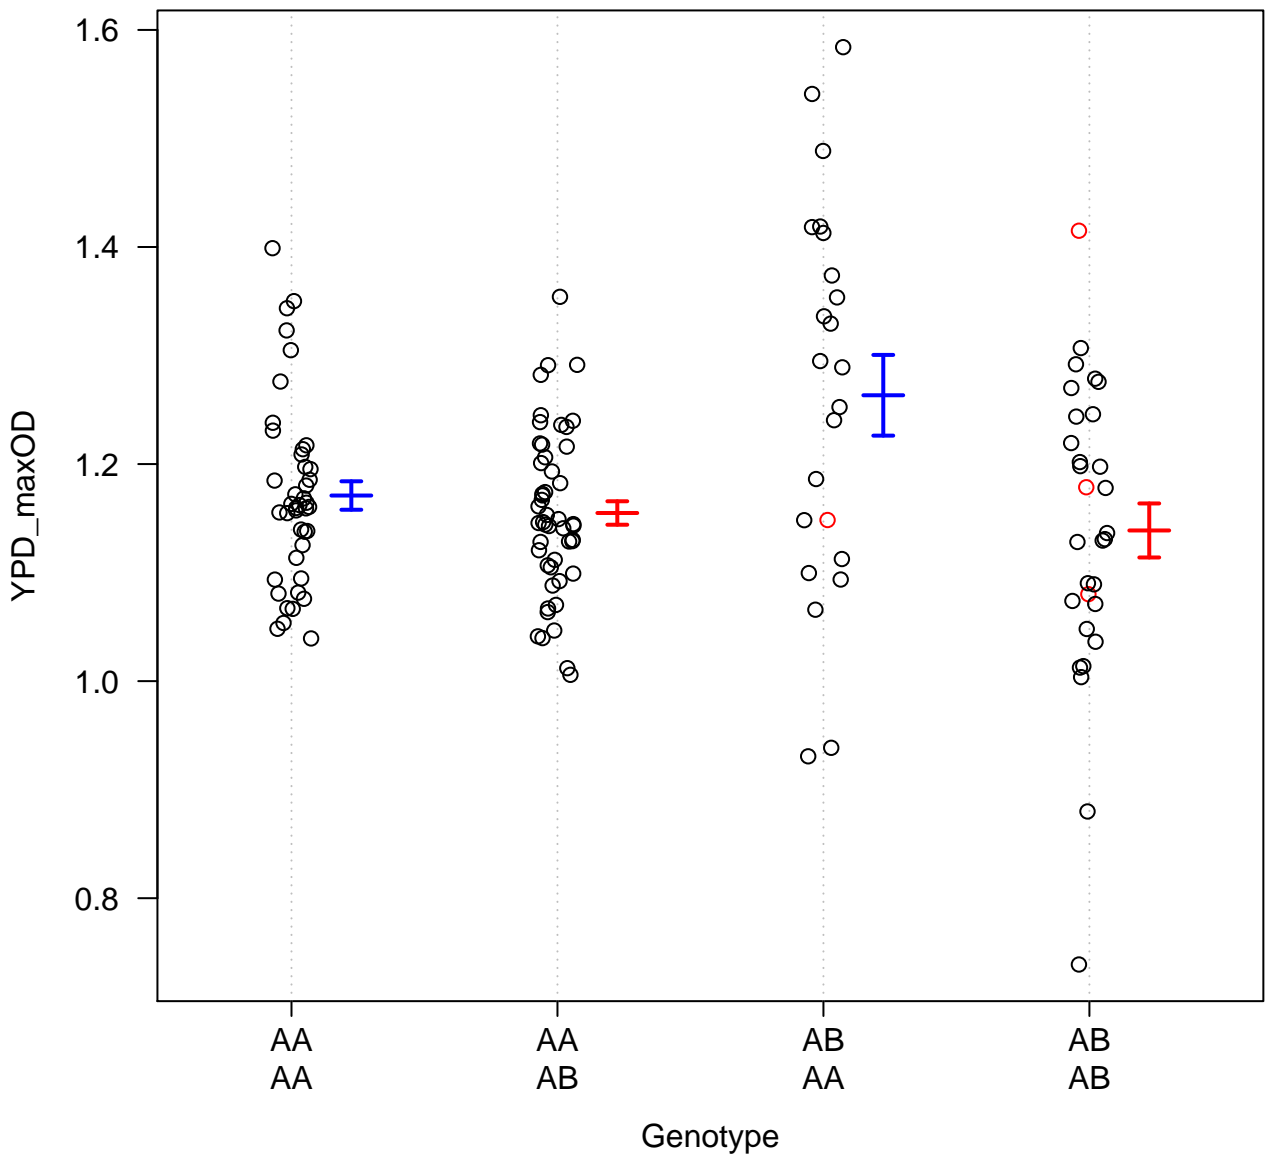

chr05\_371899

chr15\_656568

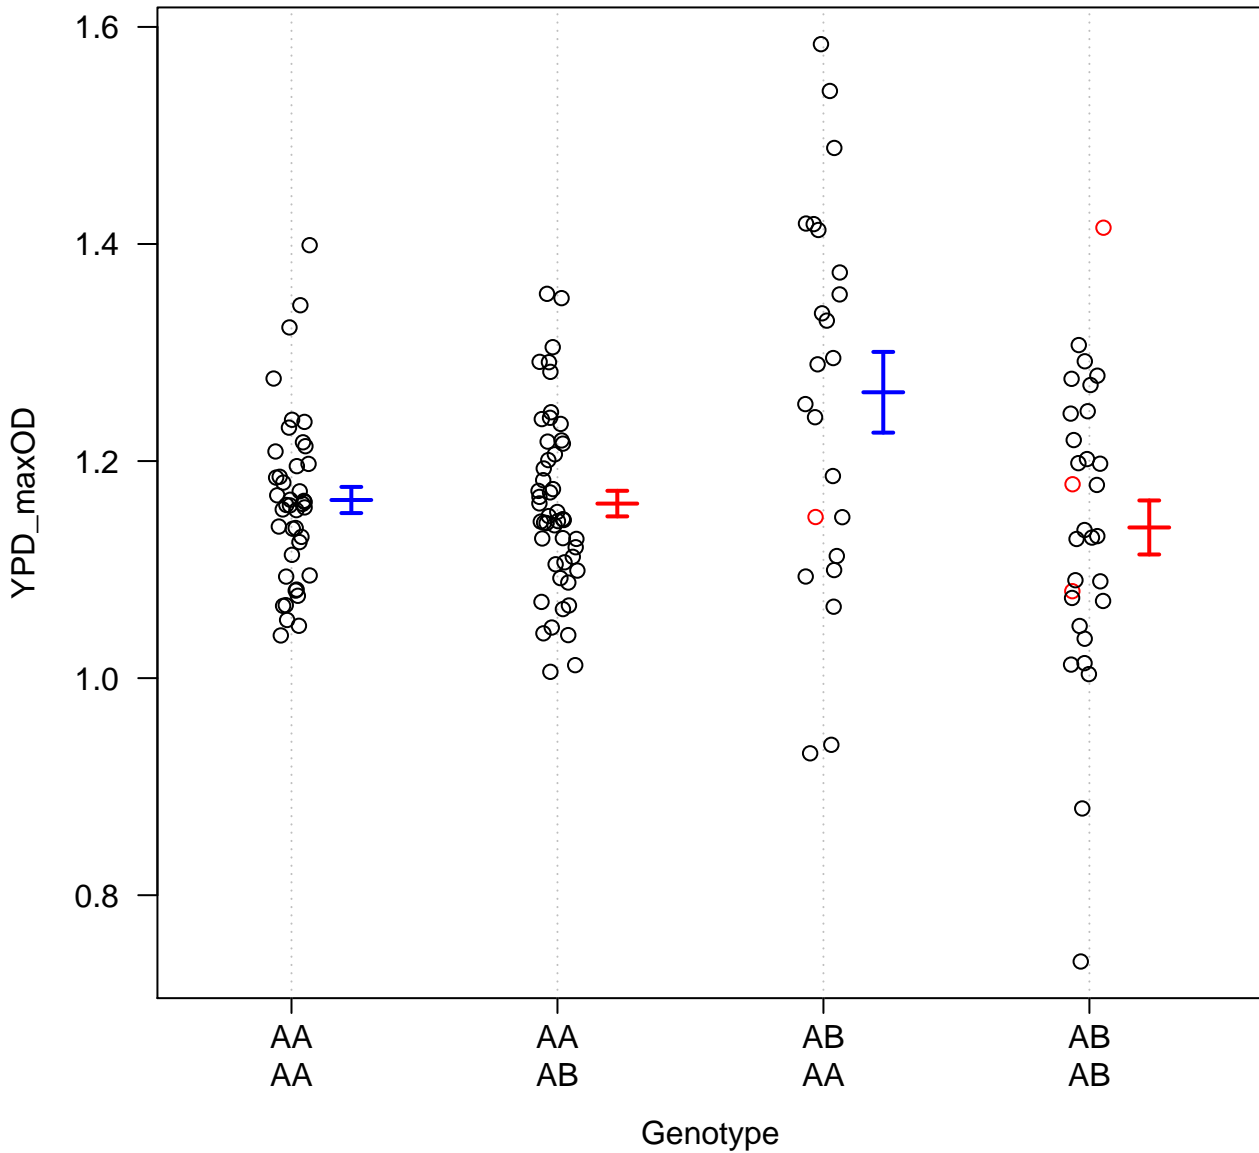

chr05\_371899  
chr01\_33865

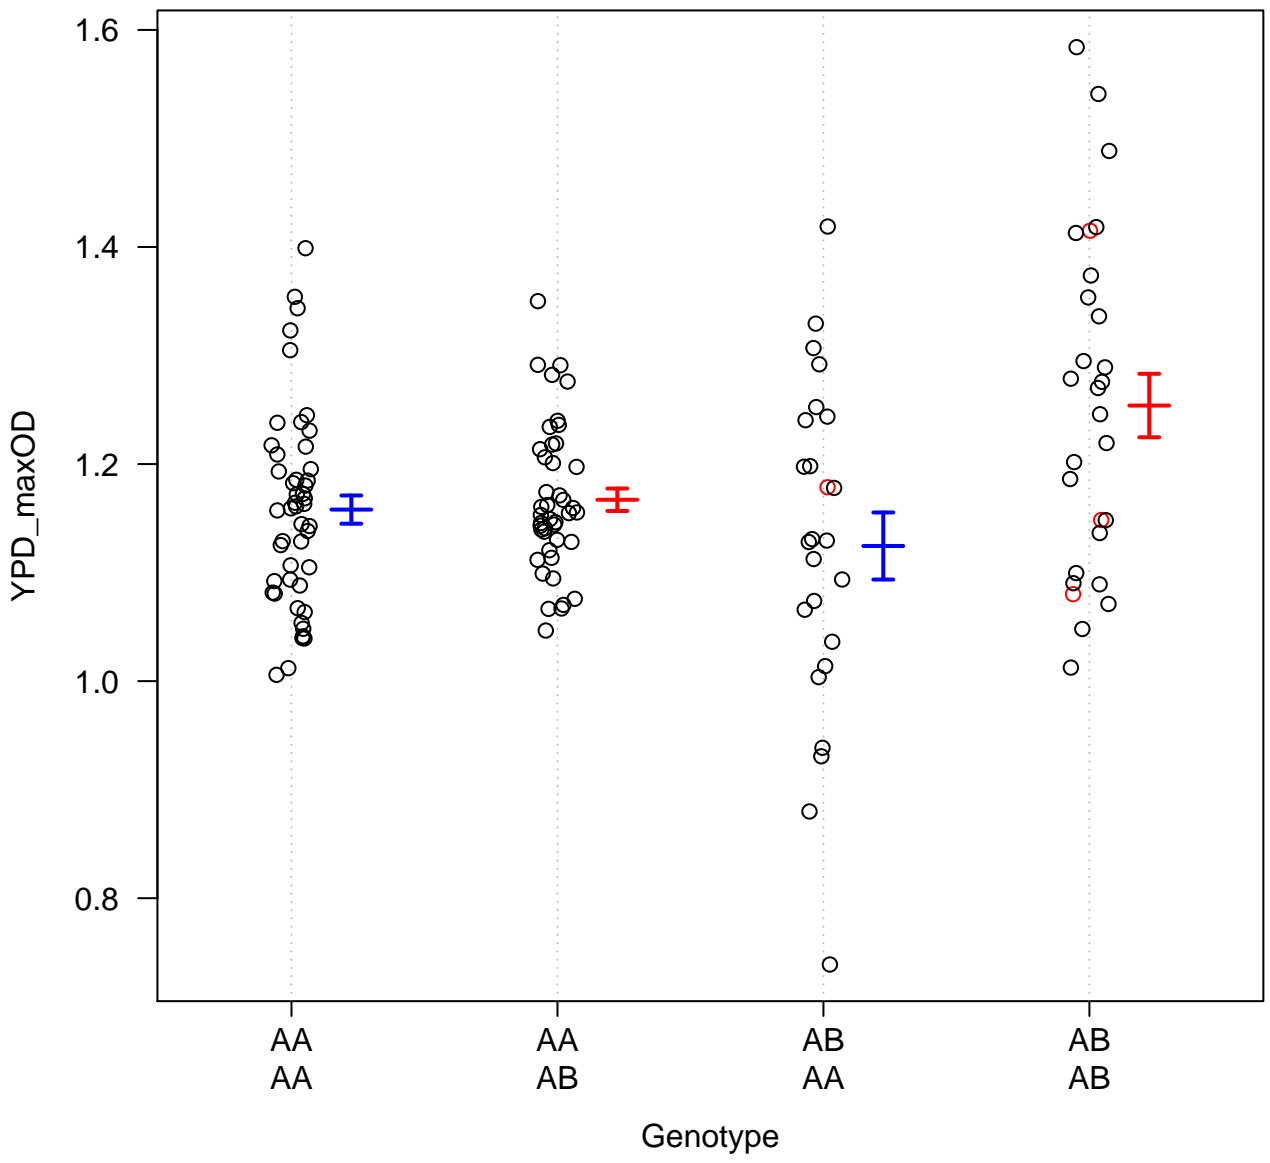

chr05\_371899  
chr15\_473018

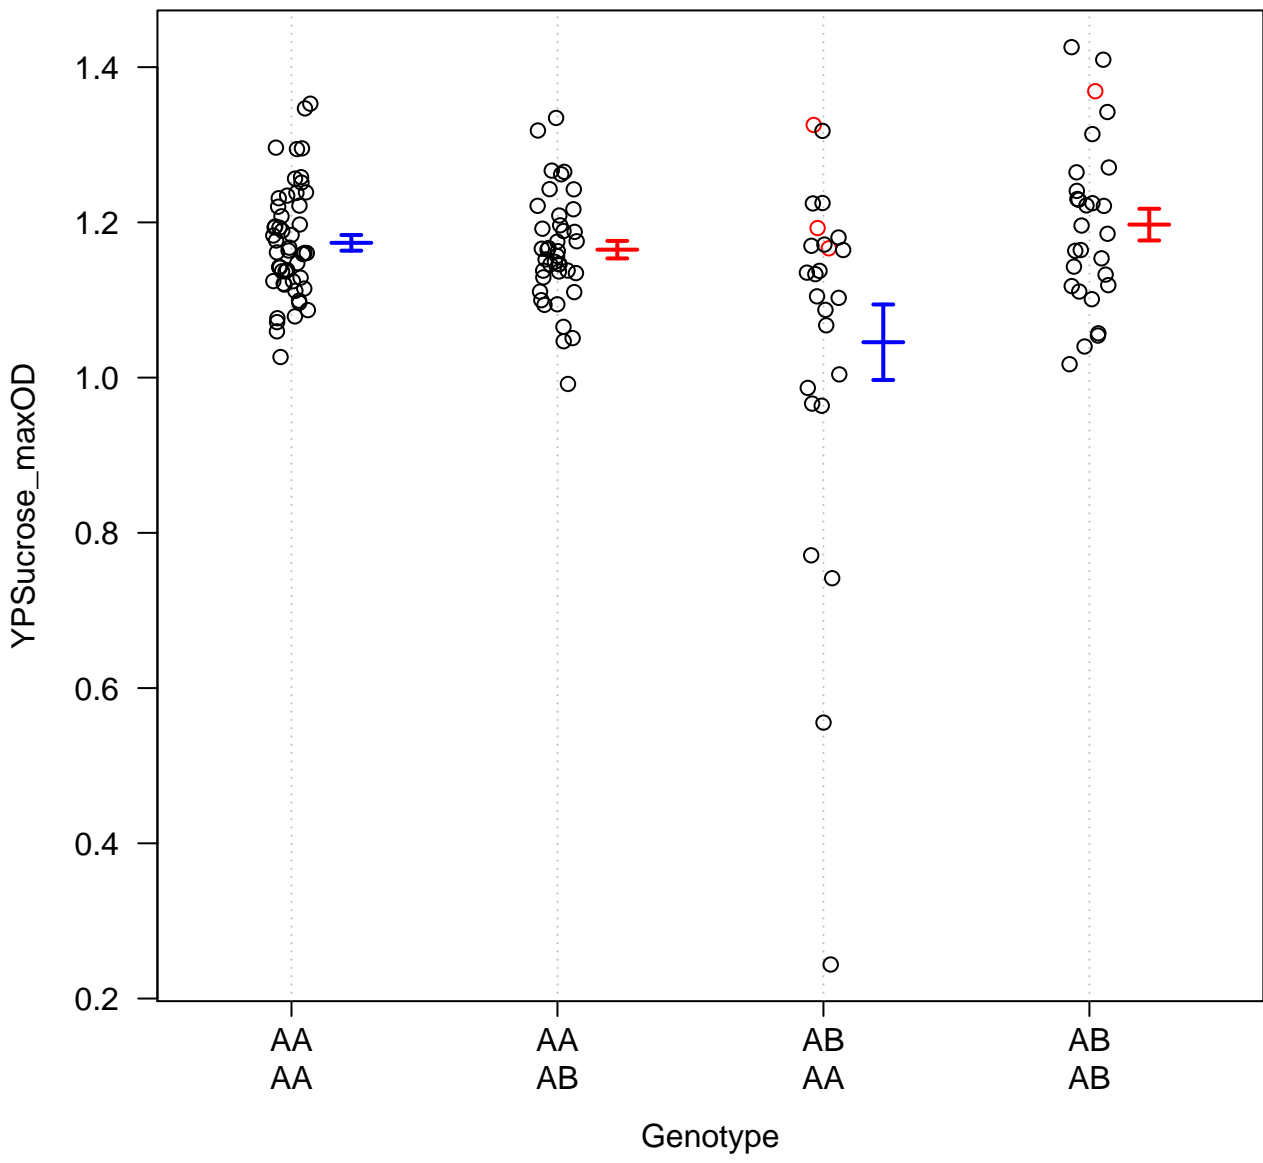

chr05\_371899  
chr01\_62951

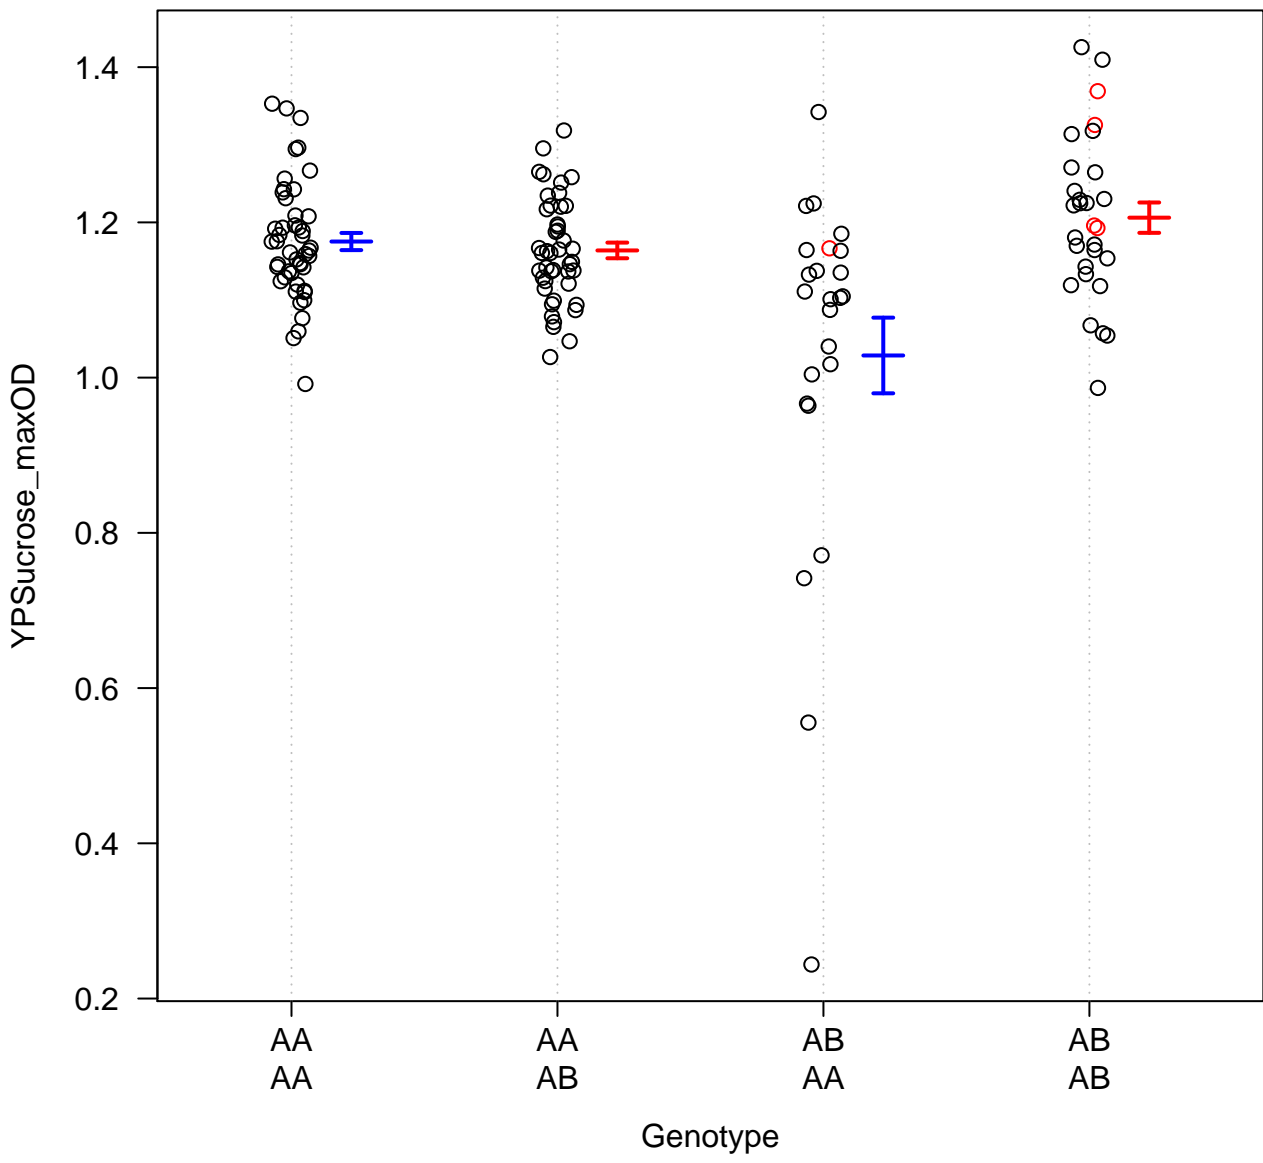

chr05\_525070  
chr01\_62951

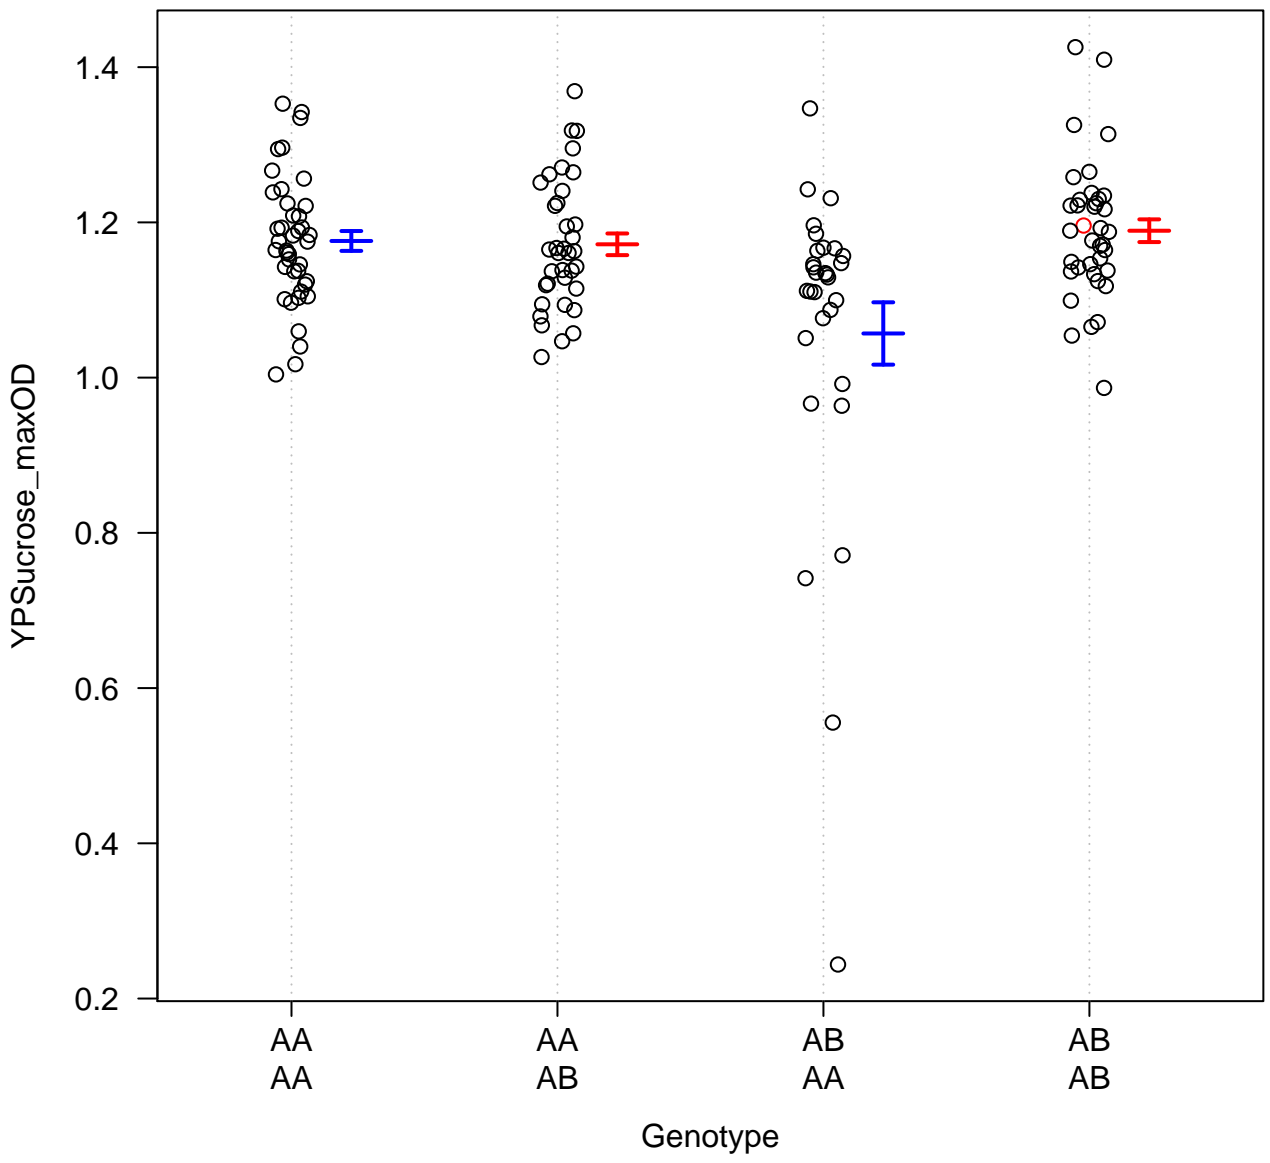

chr05\_371899  
chr09\_313896

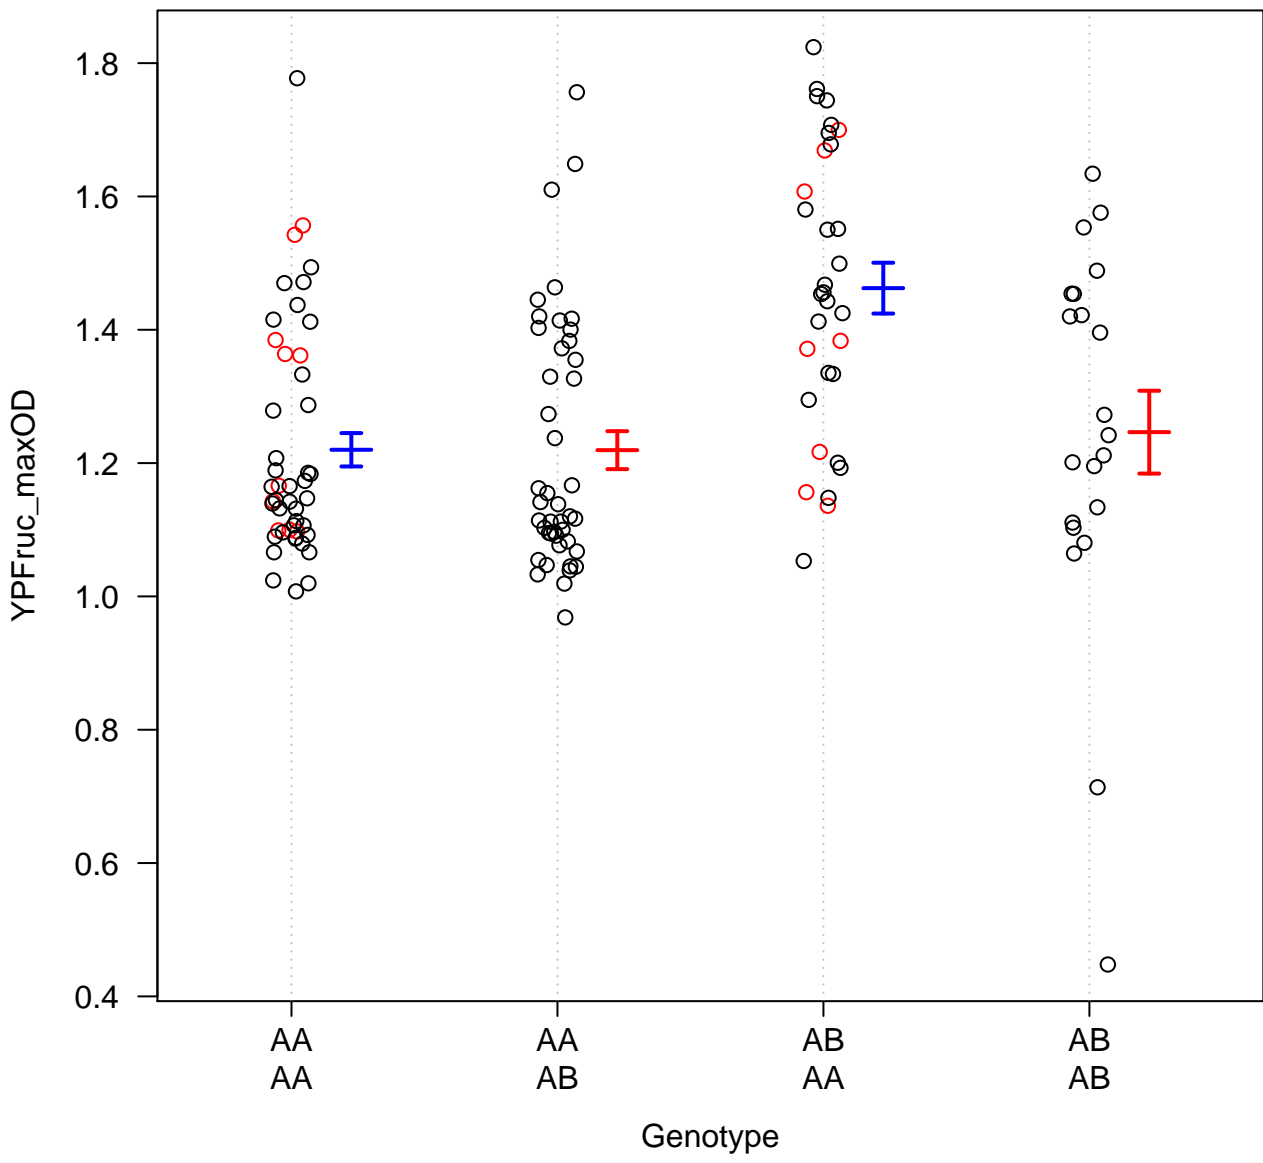

chr05\_525070

chr09\_420785

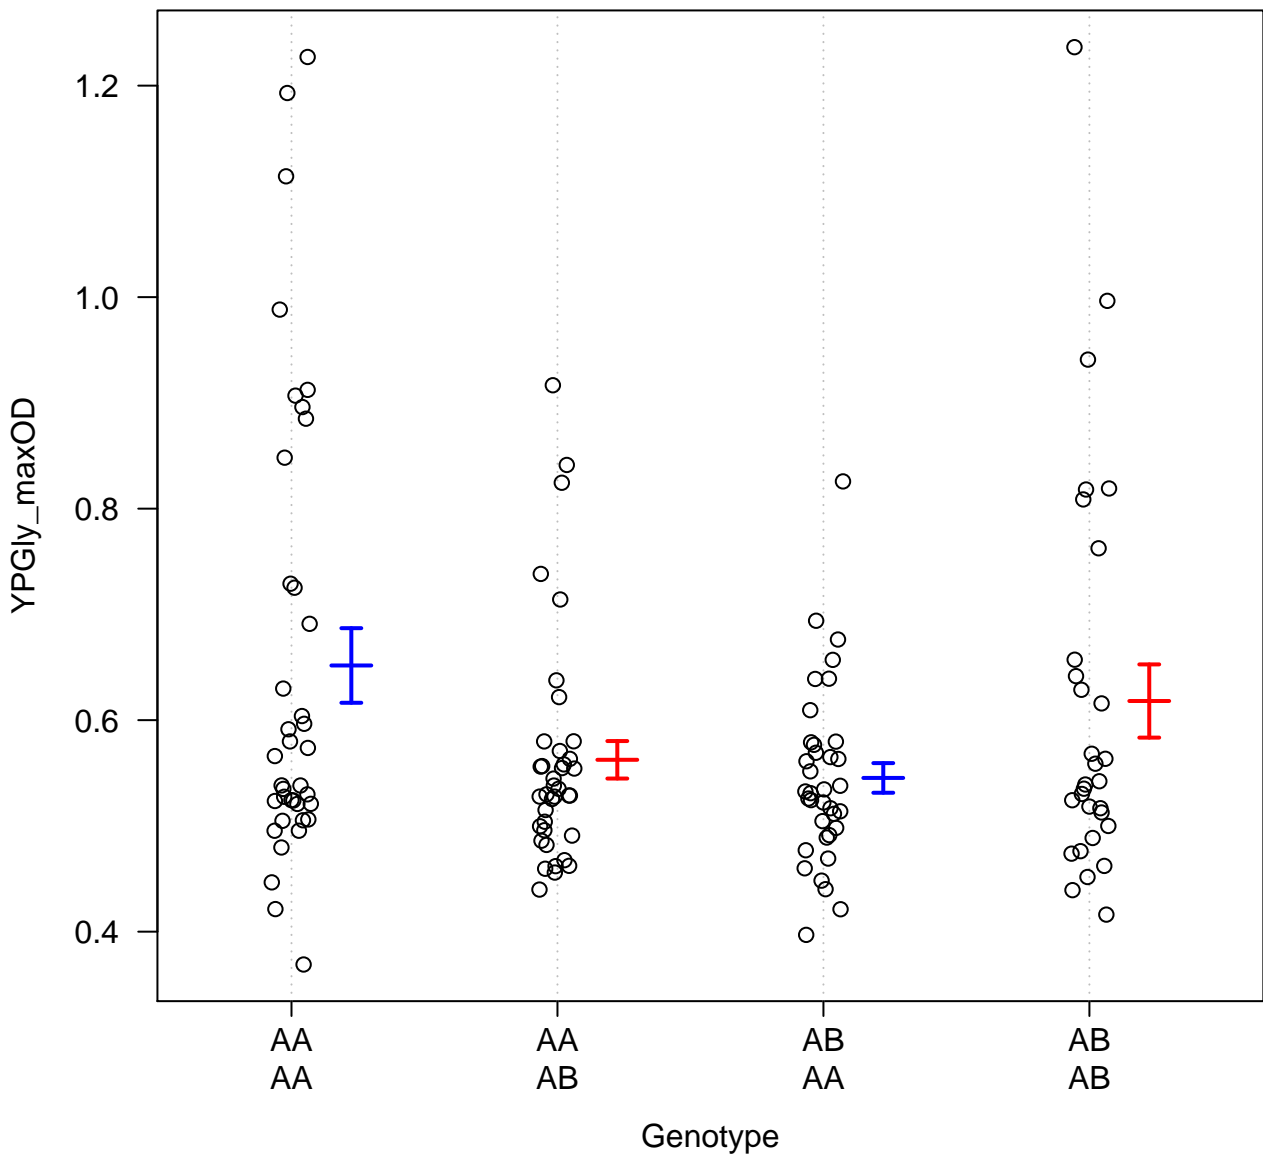



chr05\_371899  
chr01\_33865

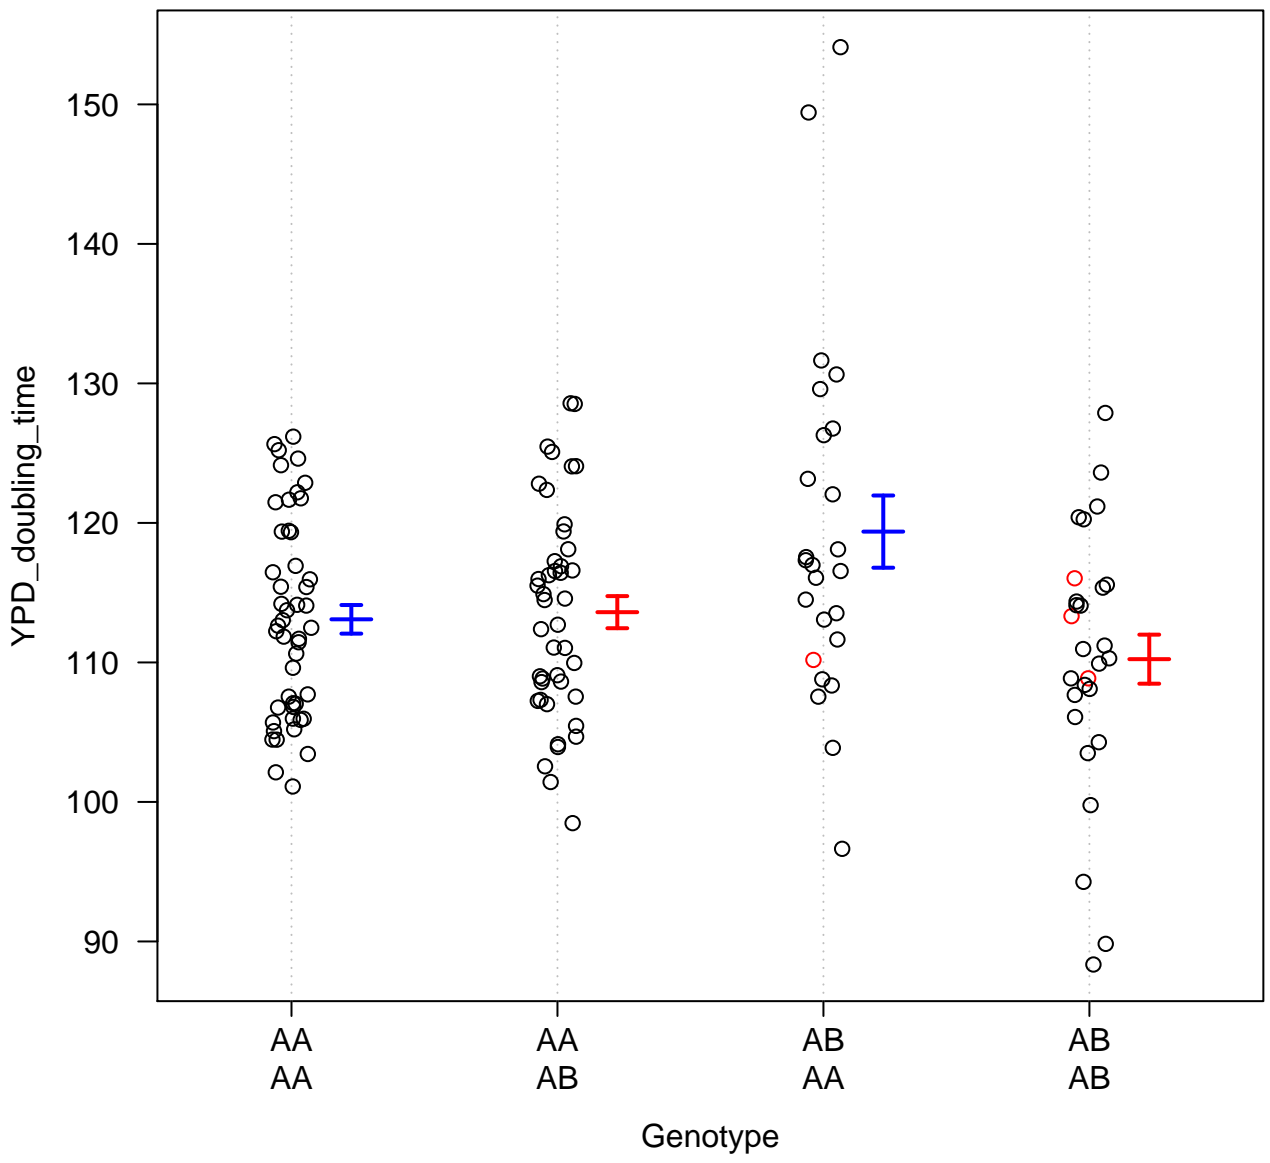

chr05\_371899  
chr15\_473018

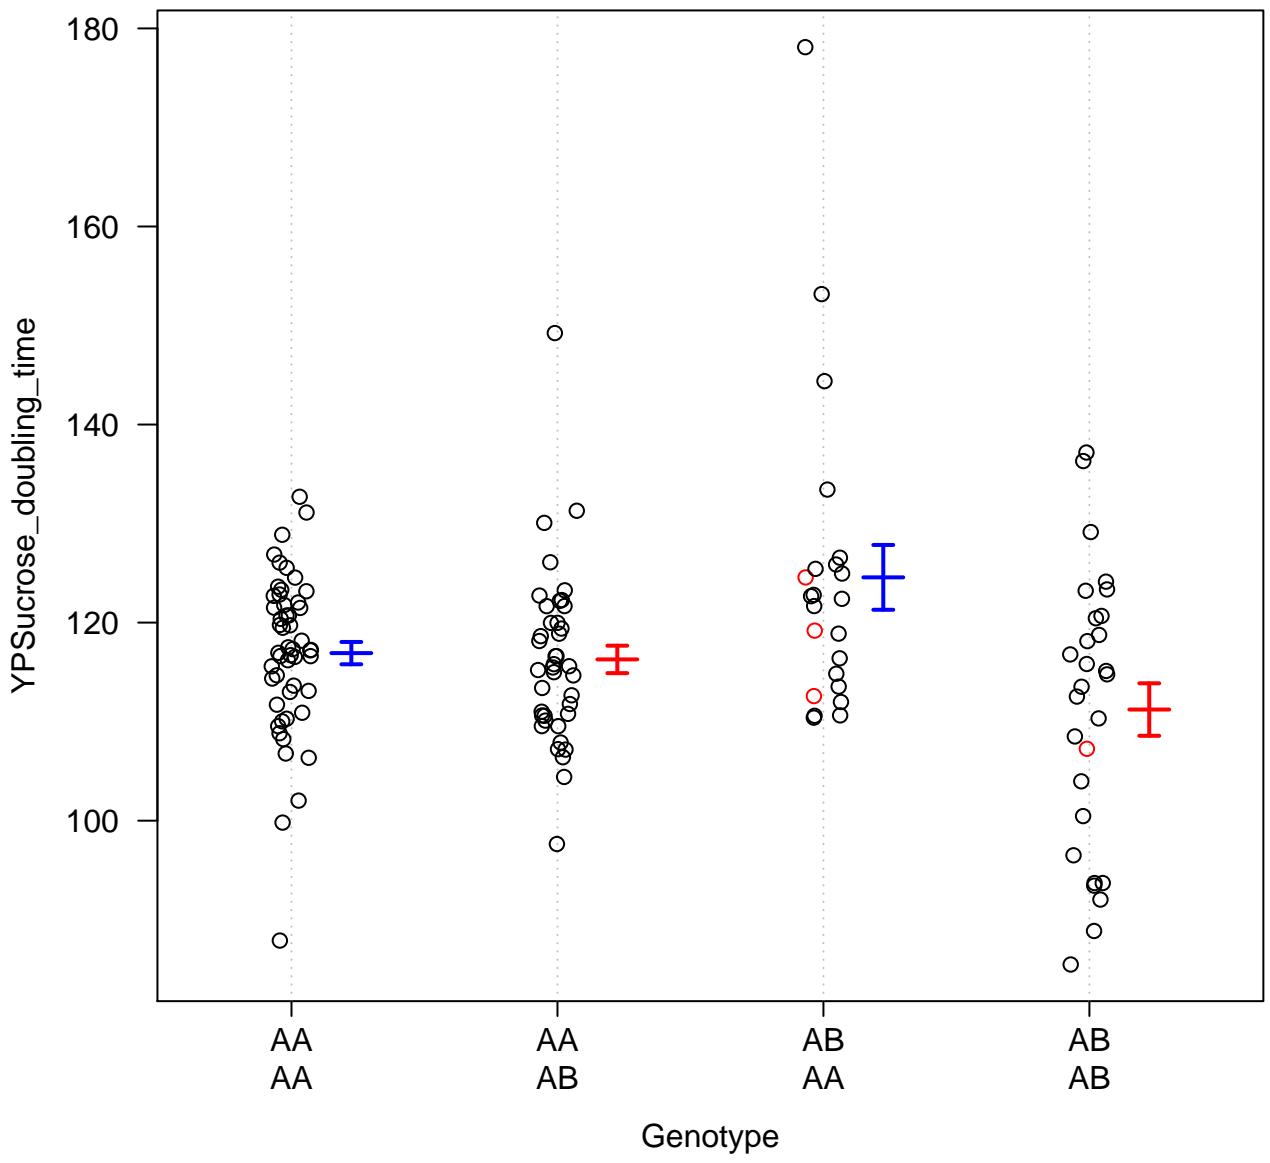

chr05\_371899  
chr13\_715970

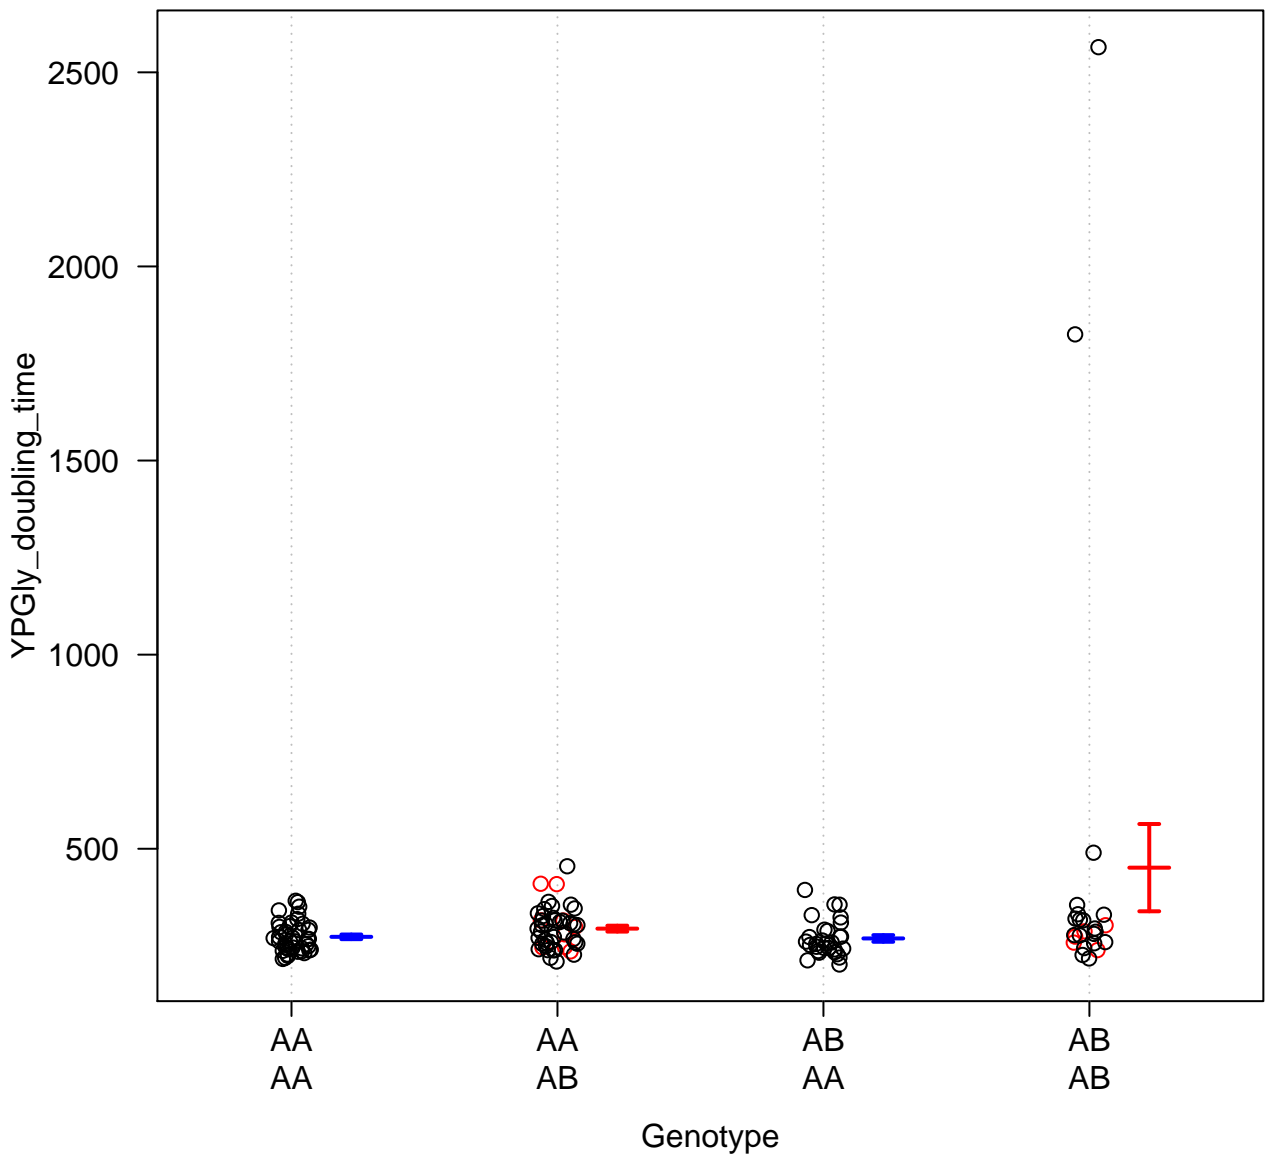

chr15\_656568  
chr05\_377186

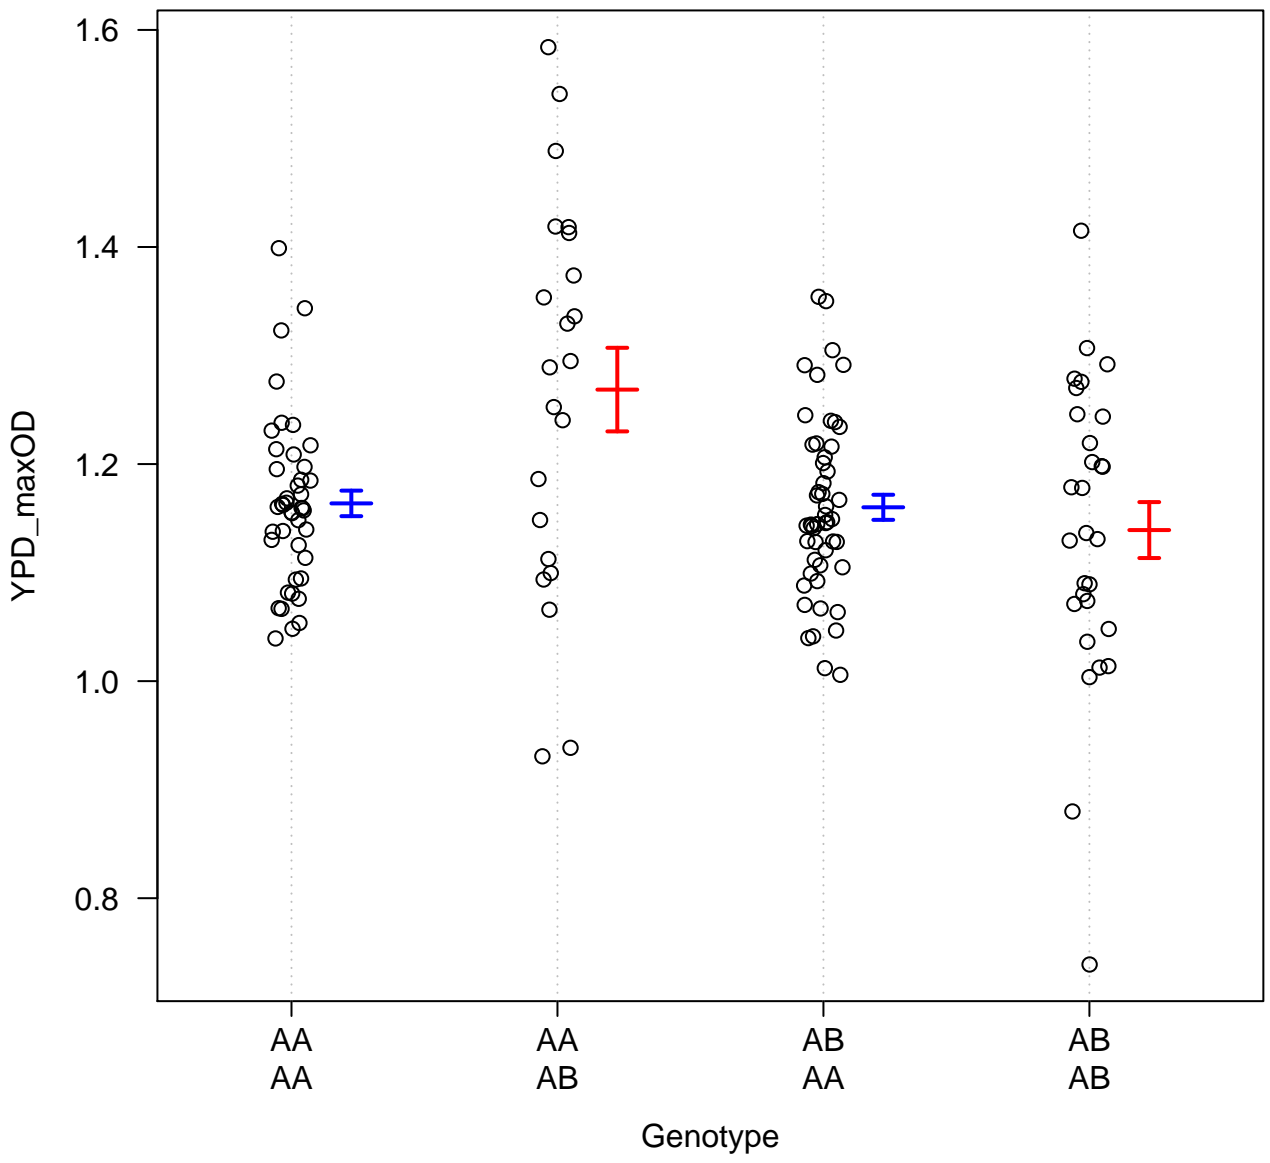

chr01\_33865  
chr05\_377186

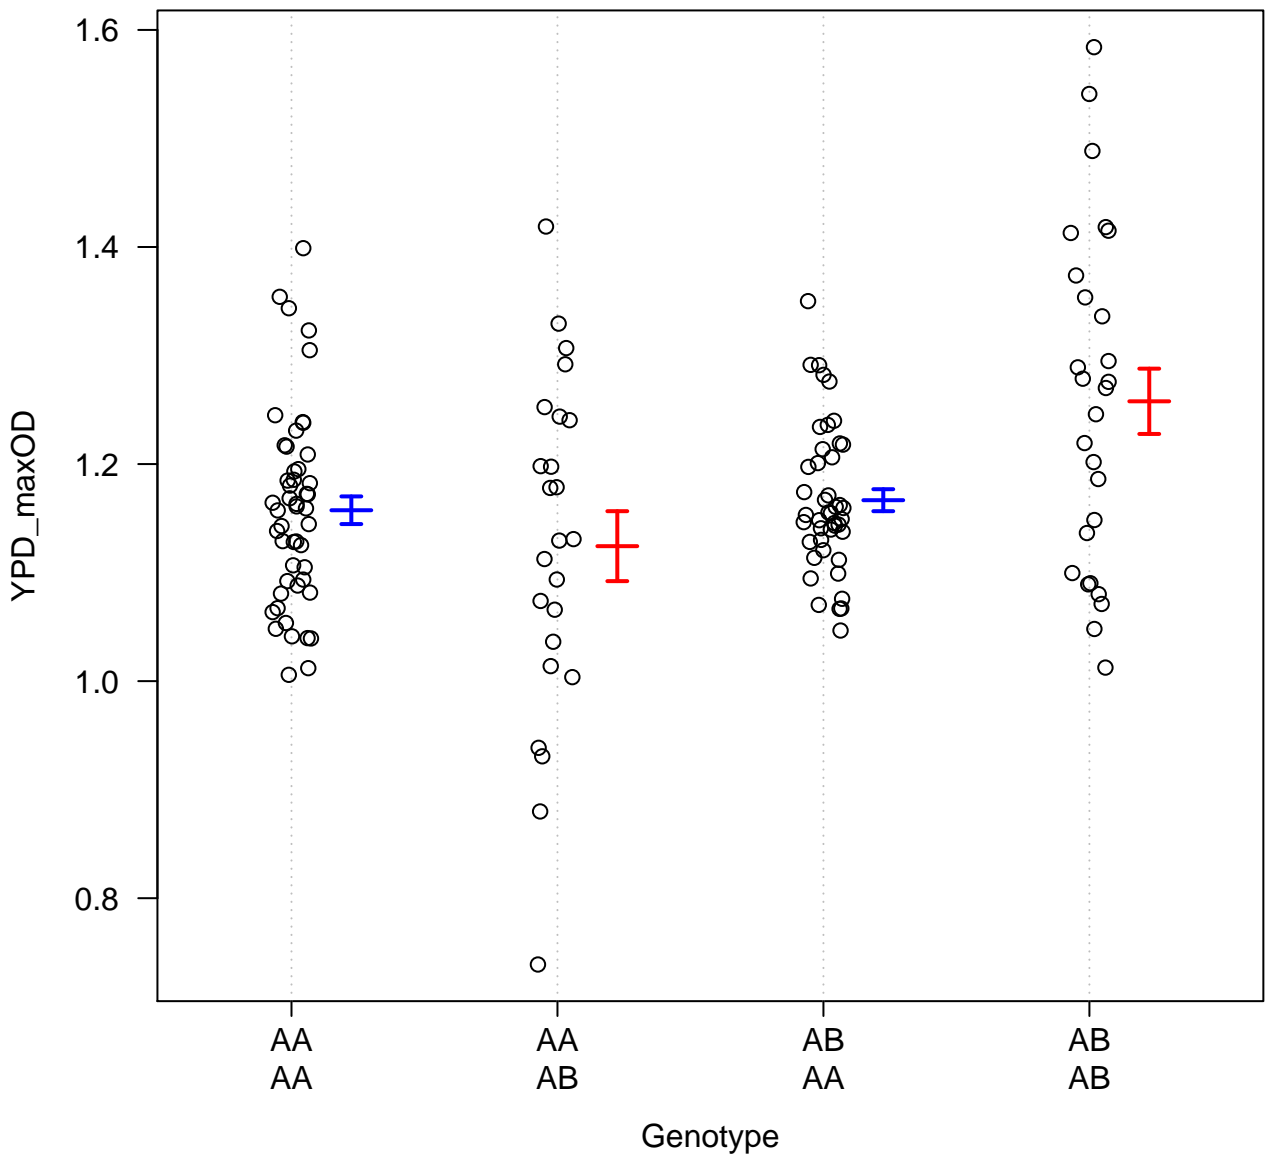

chr16\_298954  
chr10\_68089

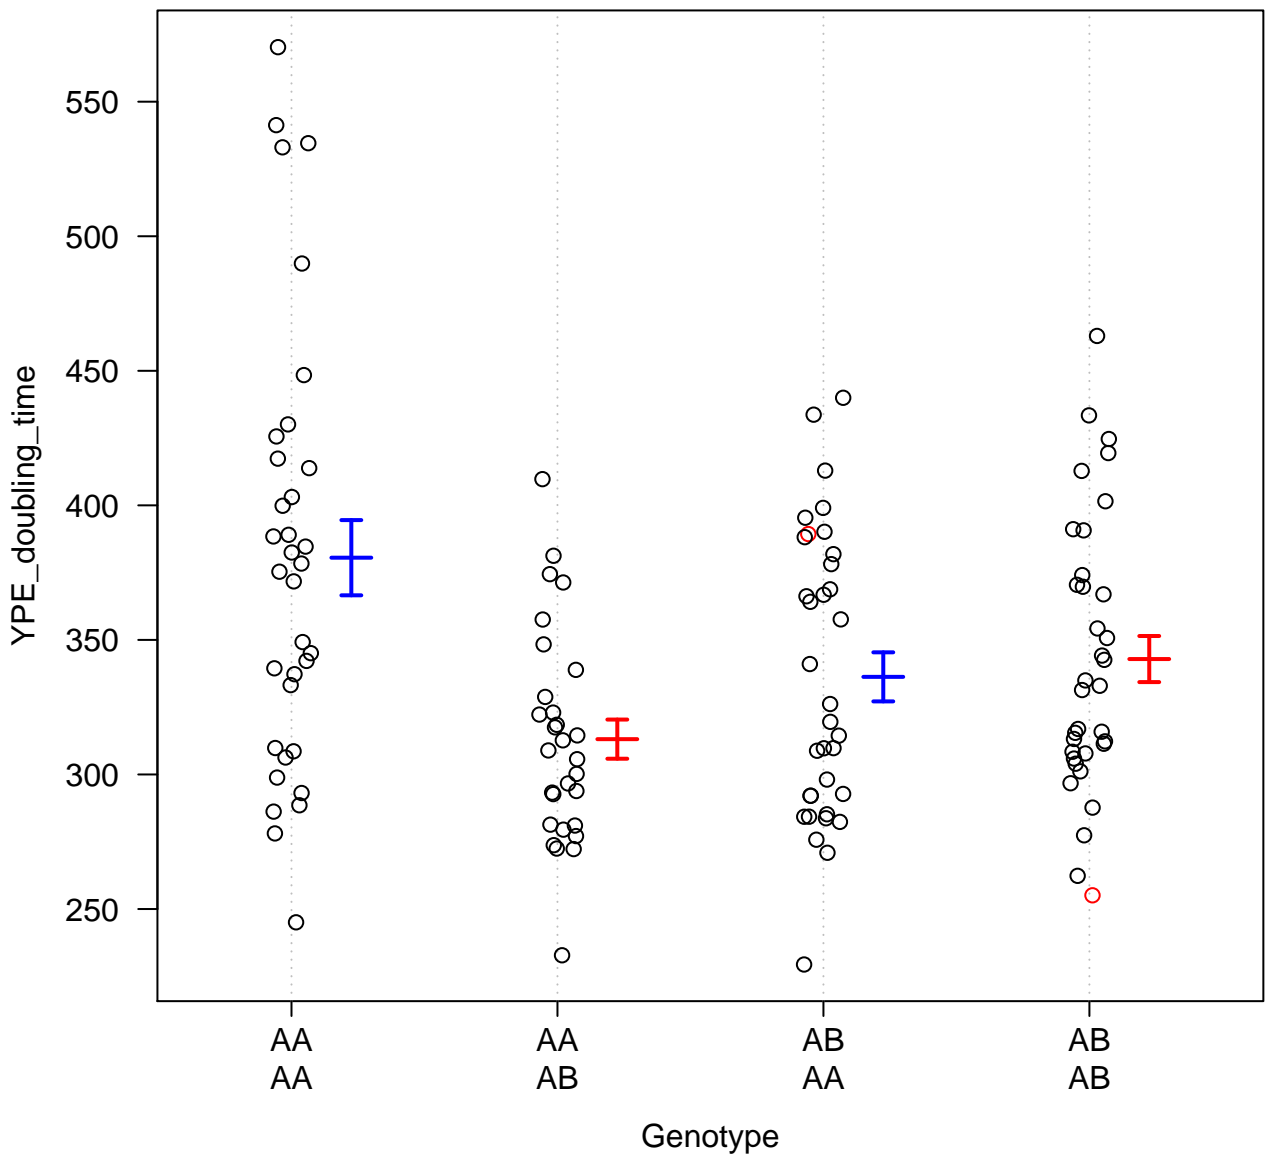

chr09\_55251  
chr13\_555077

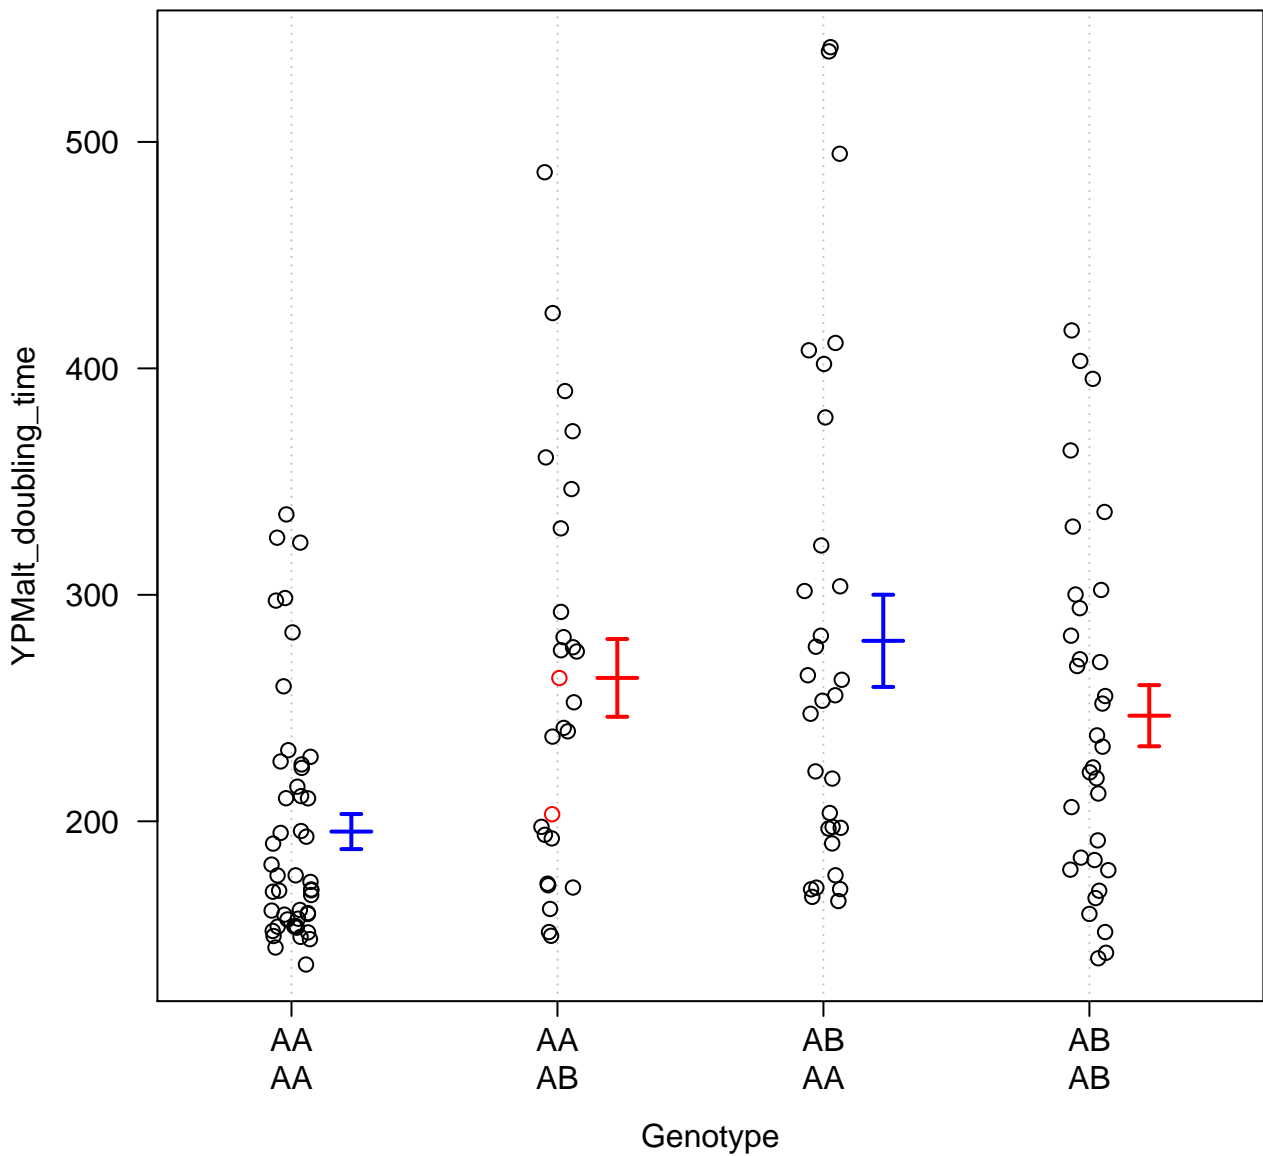

chr01\_33865  
chr05\_377186

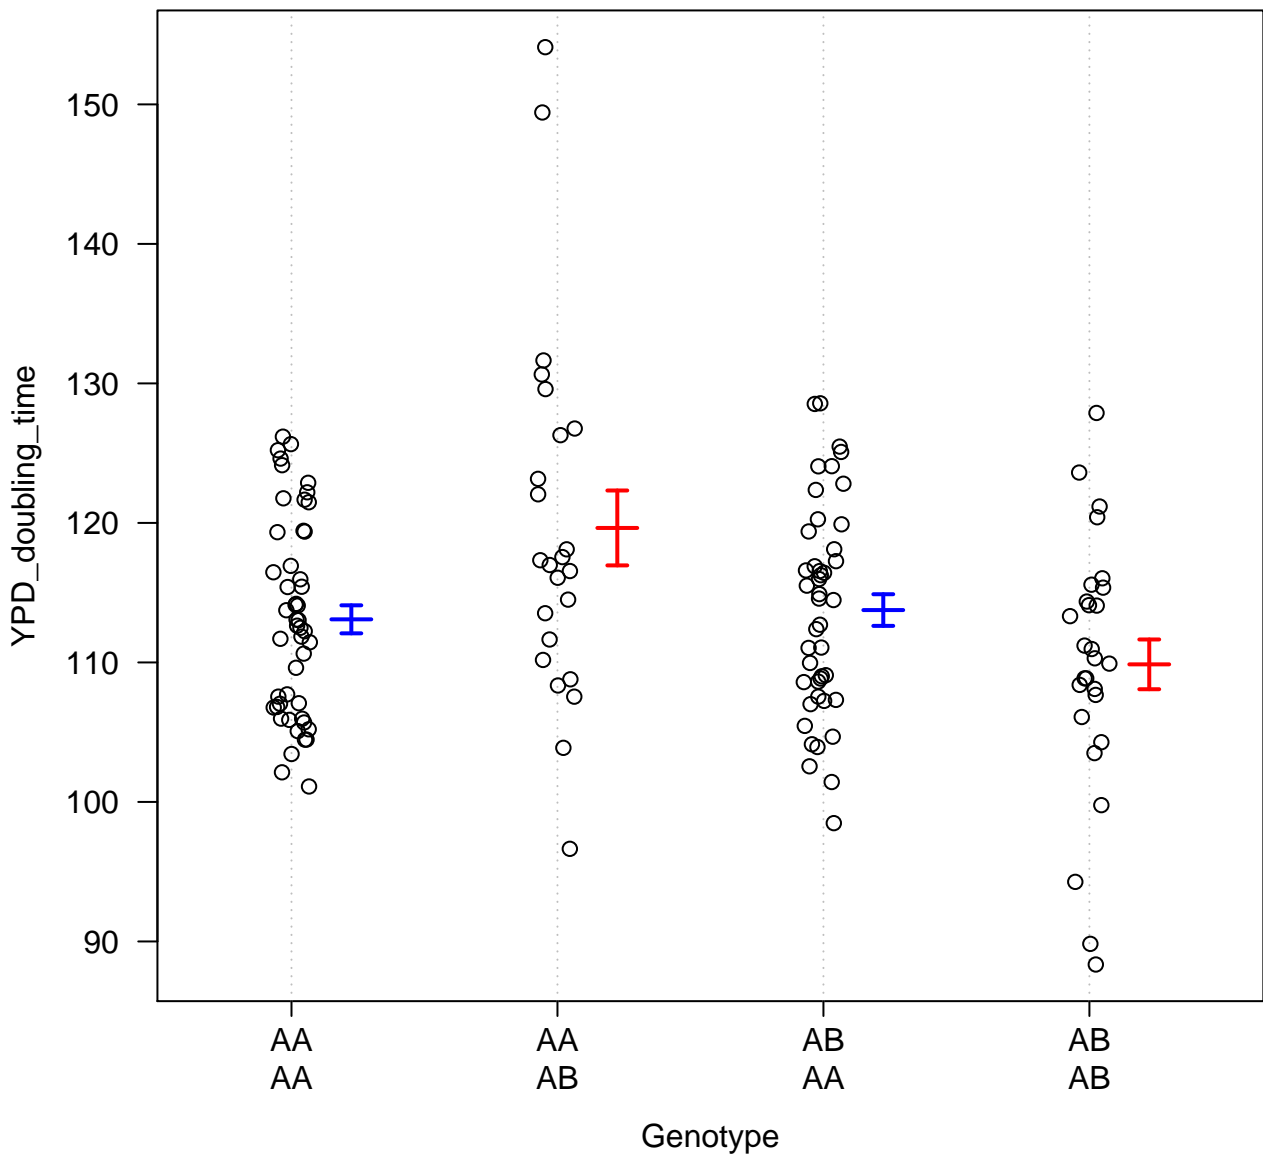



chr05\_371899  
chr15\_473018

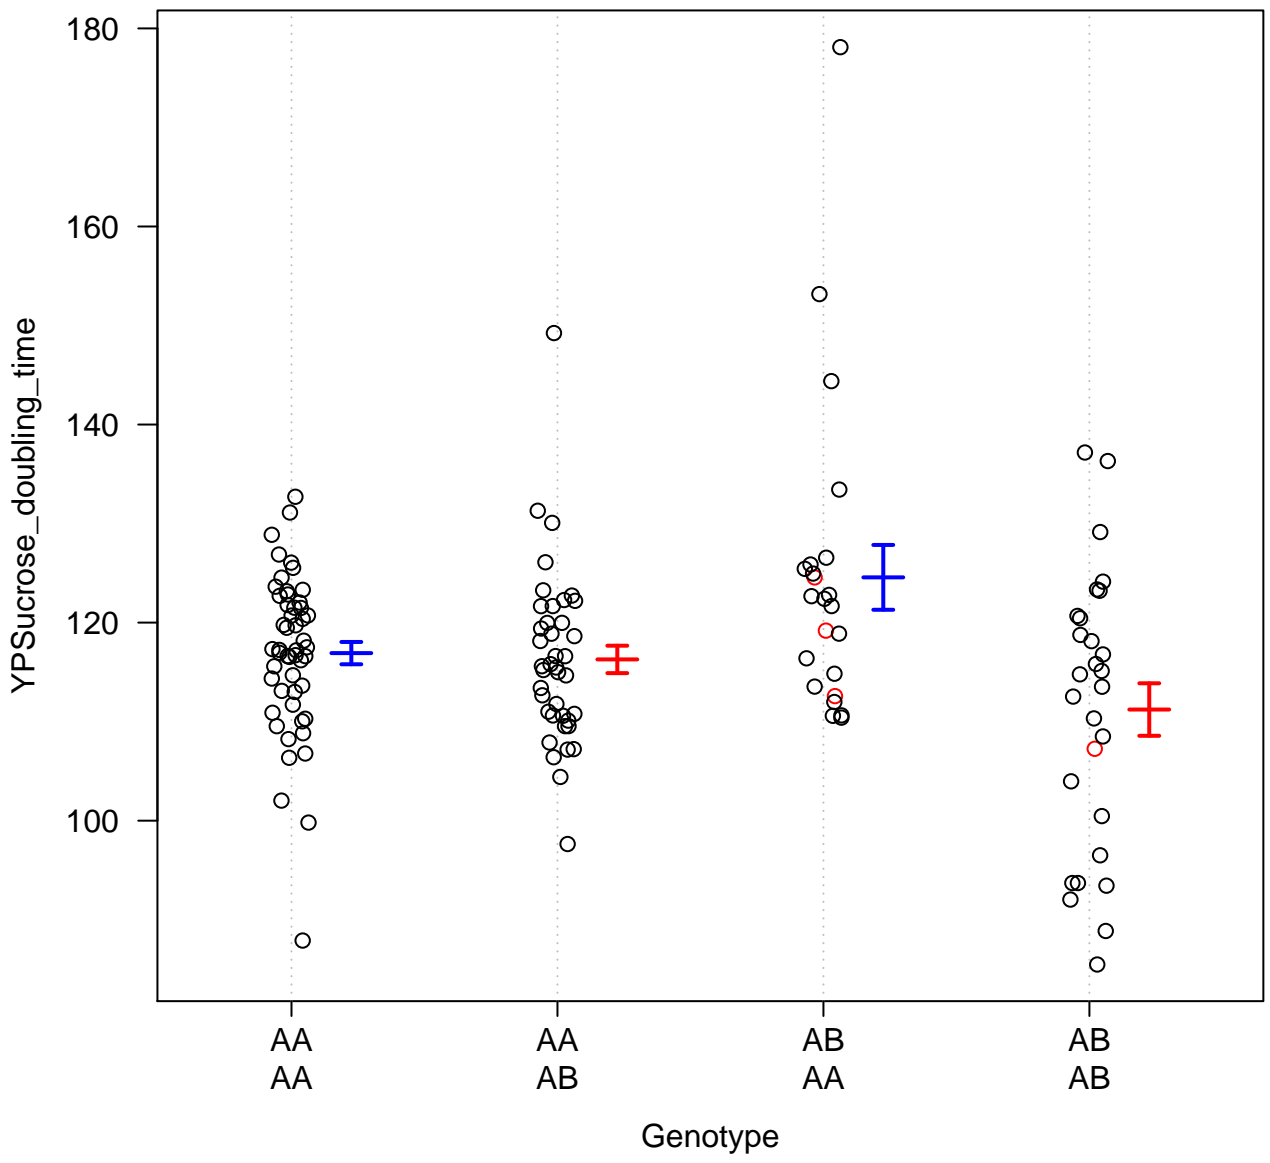

Supplement: supp_g3.113.009142_FigureS3.pdf [file supp_g3.113.009142_FigureS3.pdf]
