# Supplementary material for: Yeast Growth Plasticity Is Regulated by Environment-Specific Multi-QTL Interactions
Source: PubMed Central journal article supplement (PMC4025475; doi:10.1534/g3.113.009142), 2014-01-28

chr02\_516338

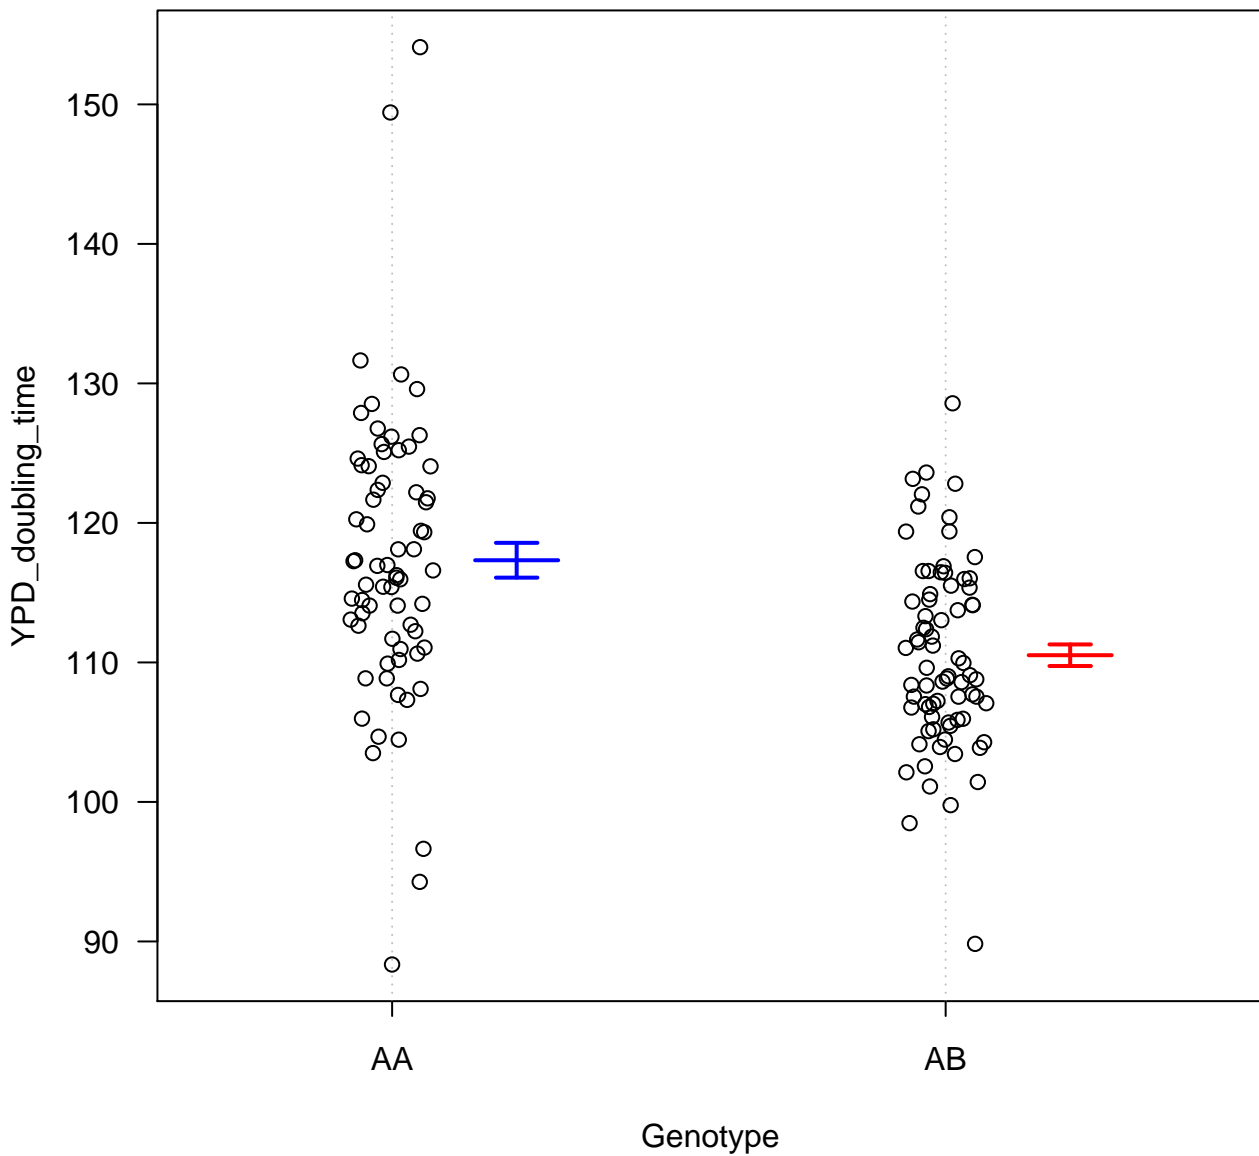

chr14\_491256

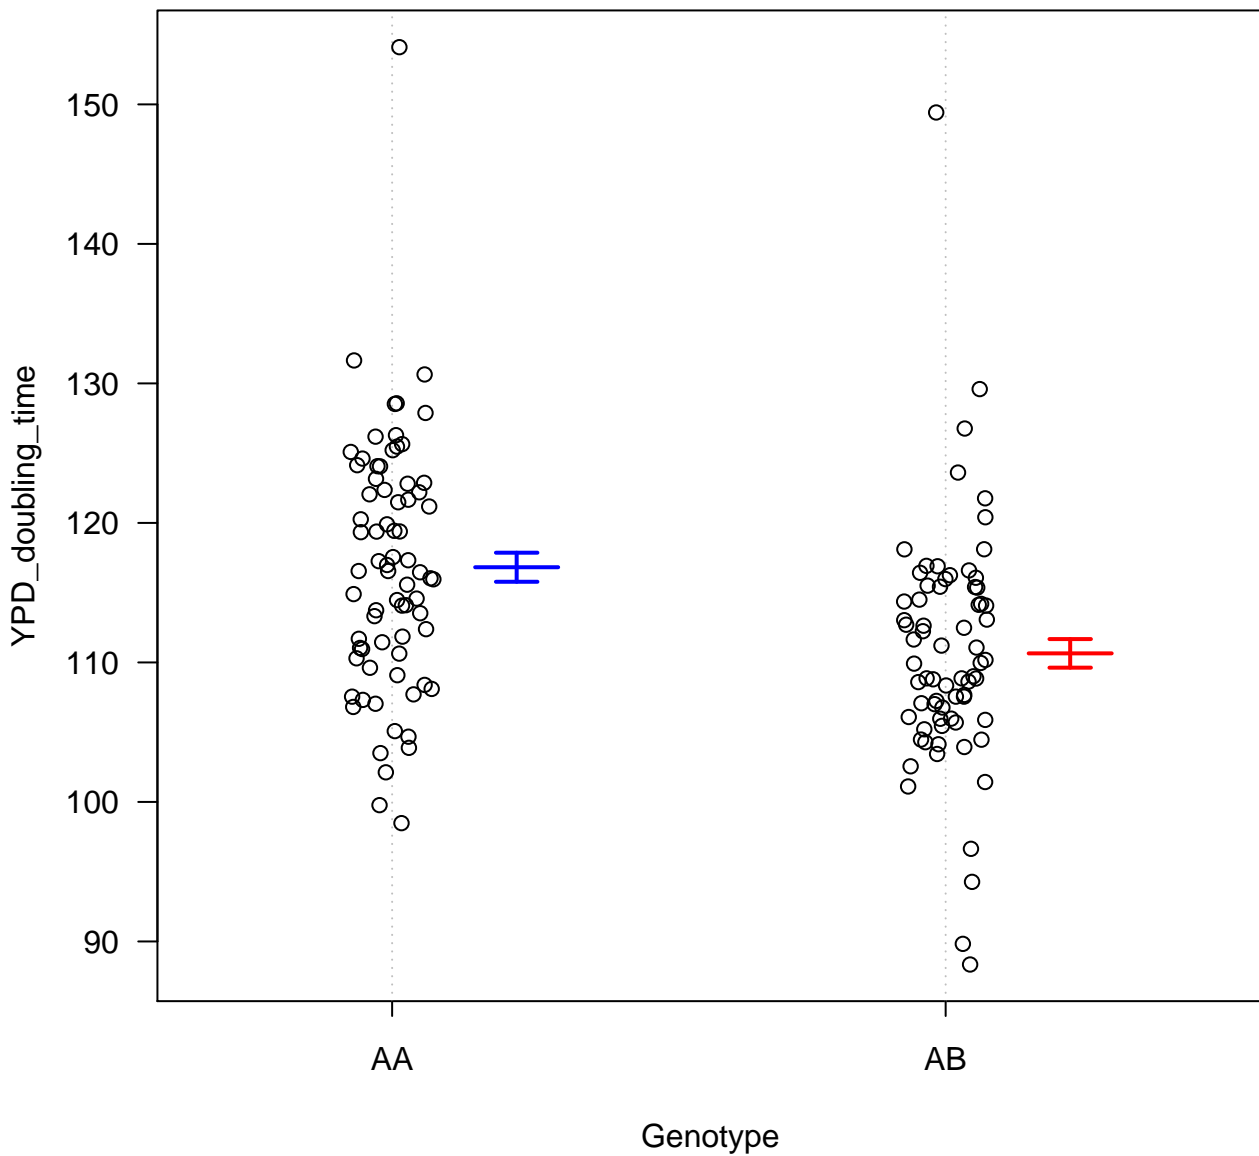

chr14\_465189

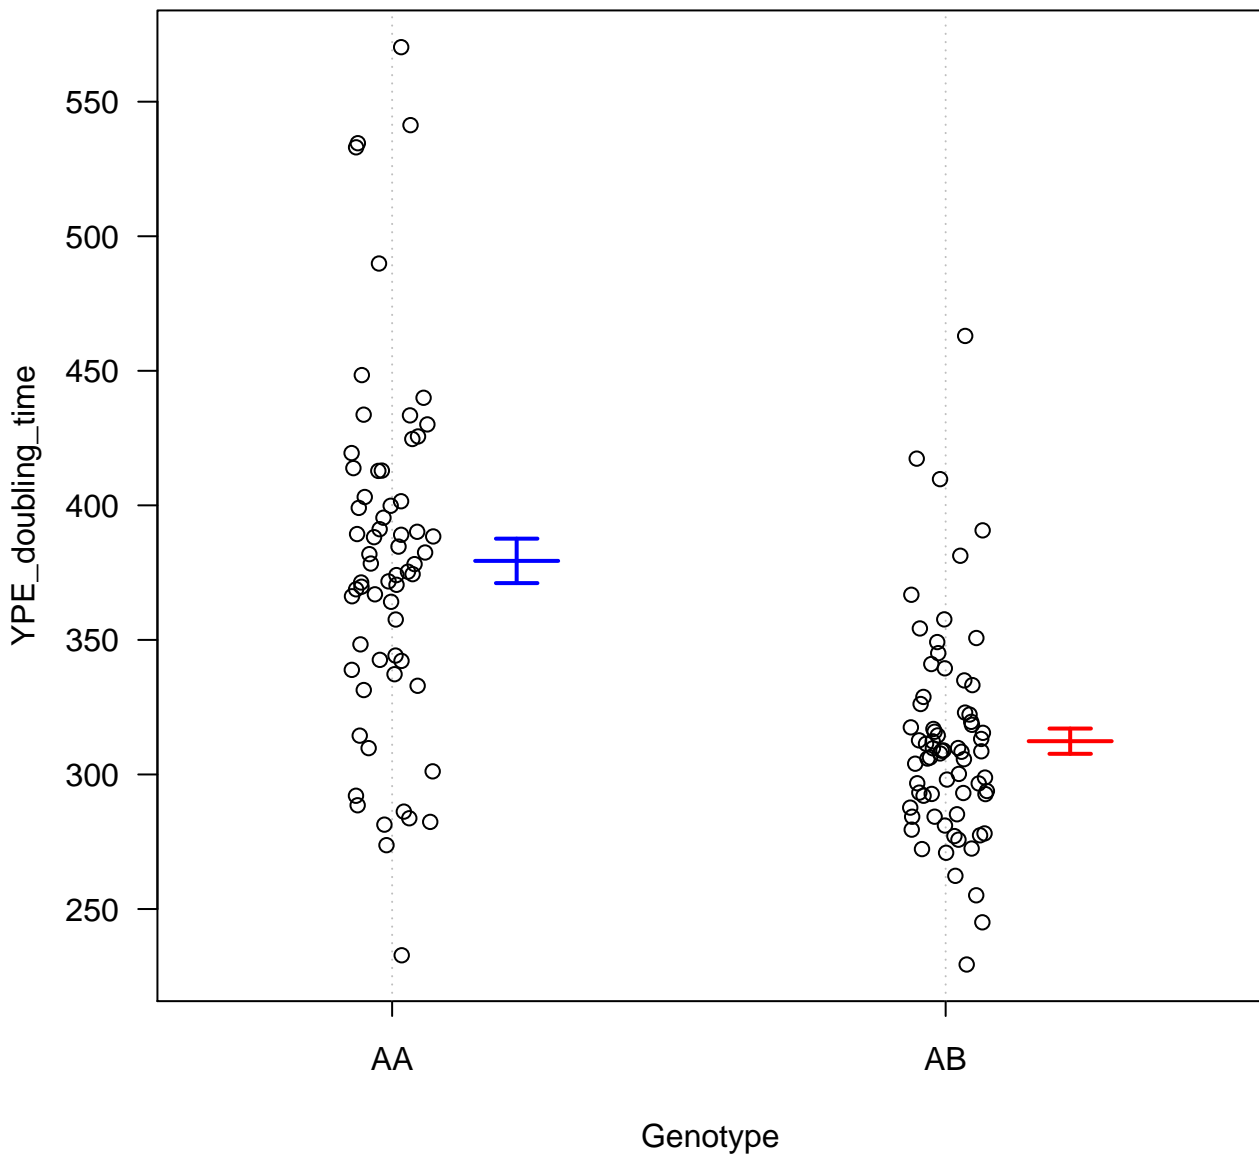

chr05\_525070

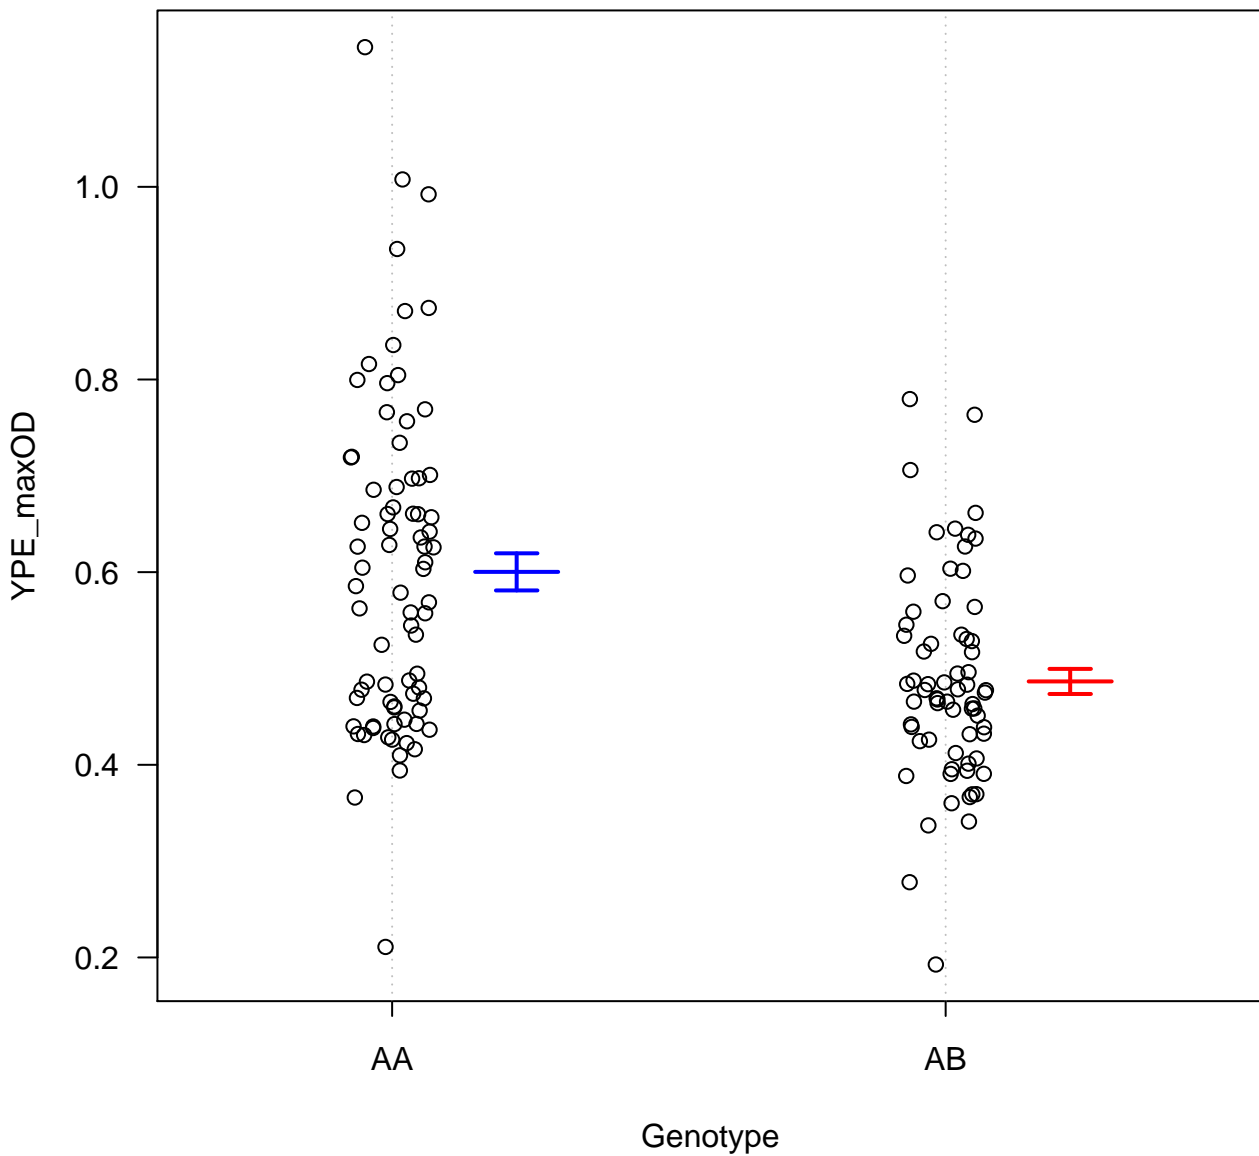

chr02\_558465

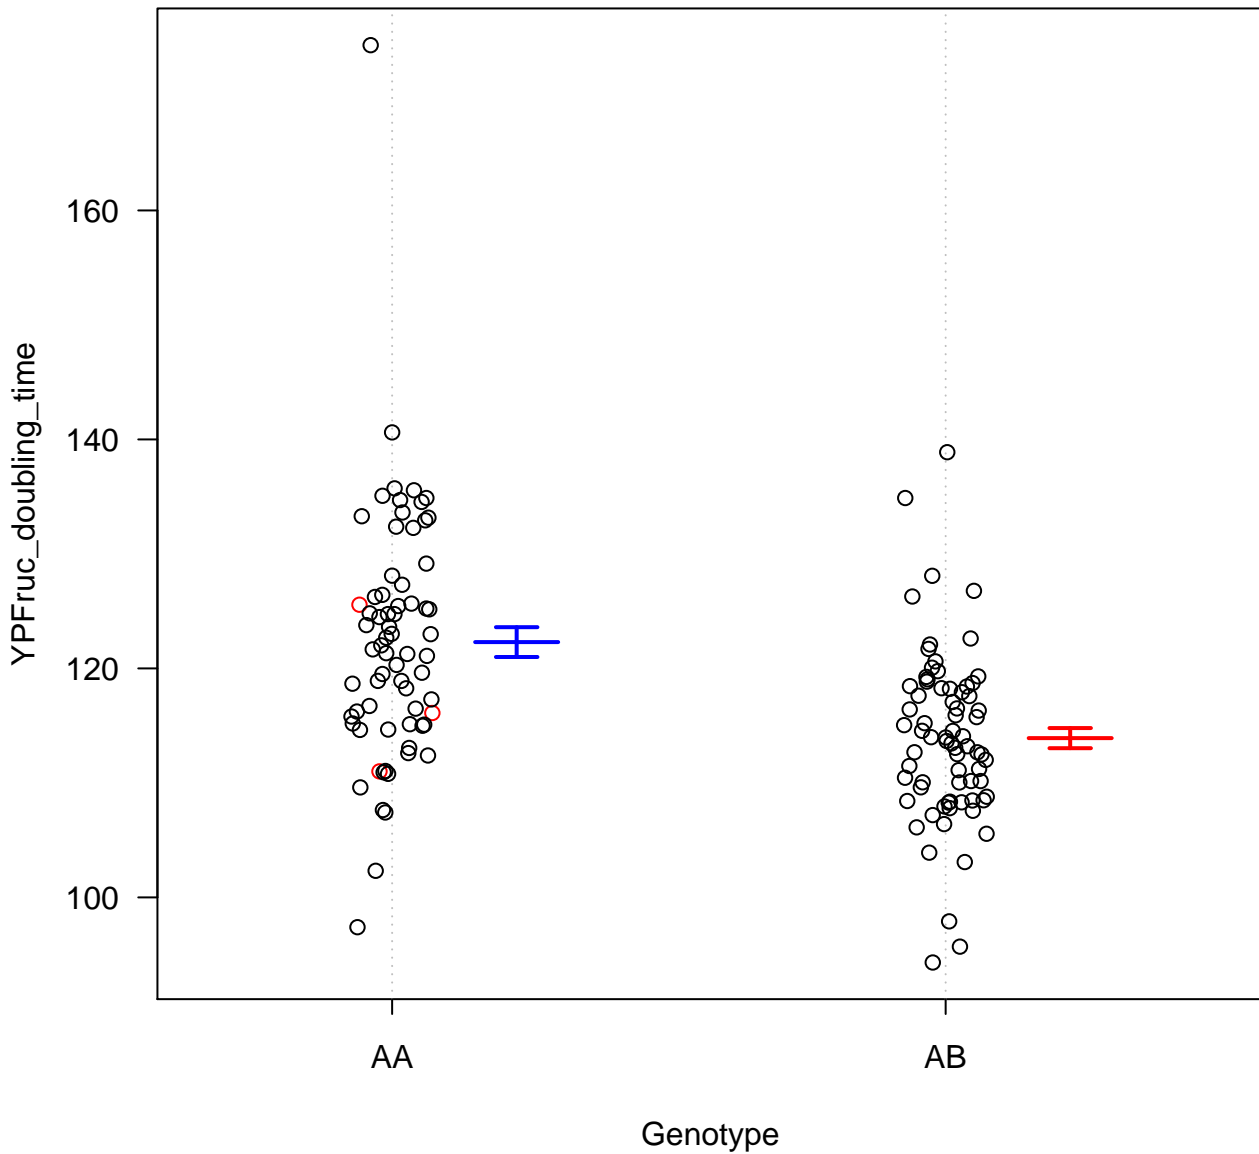

chr13\_26435

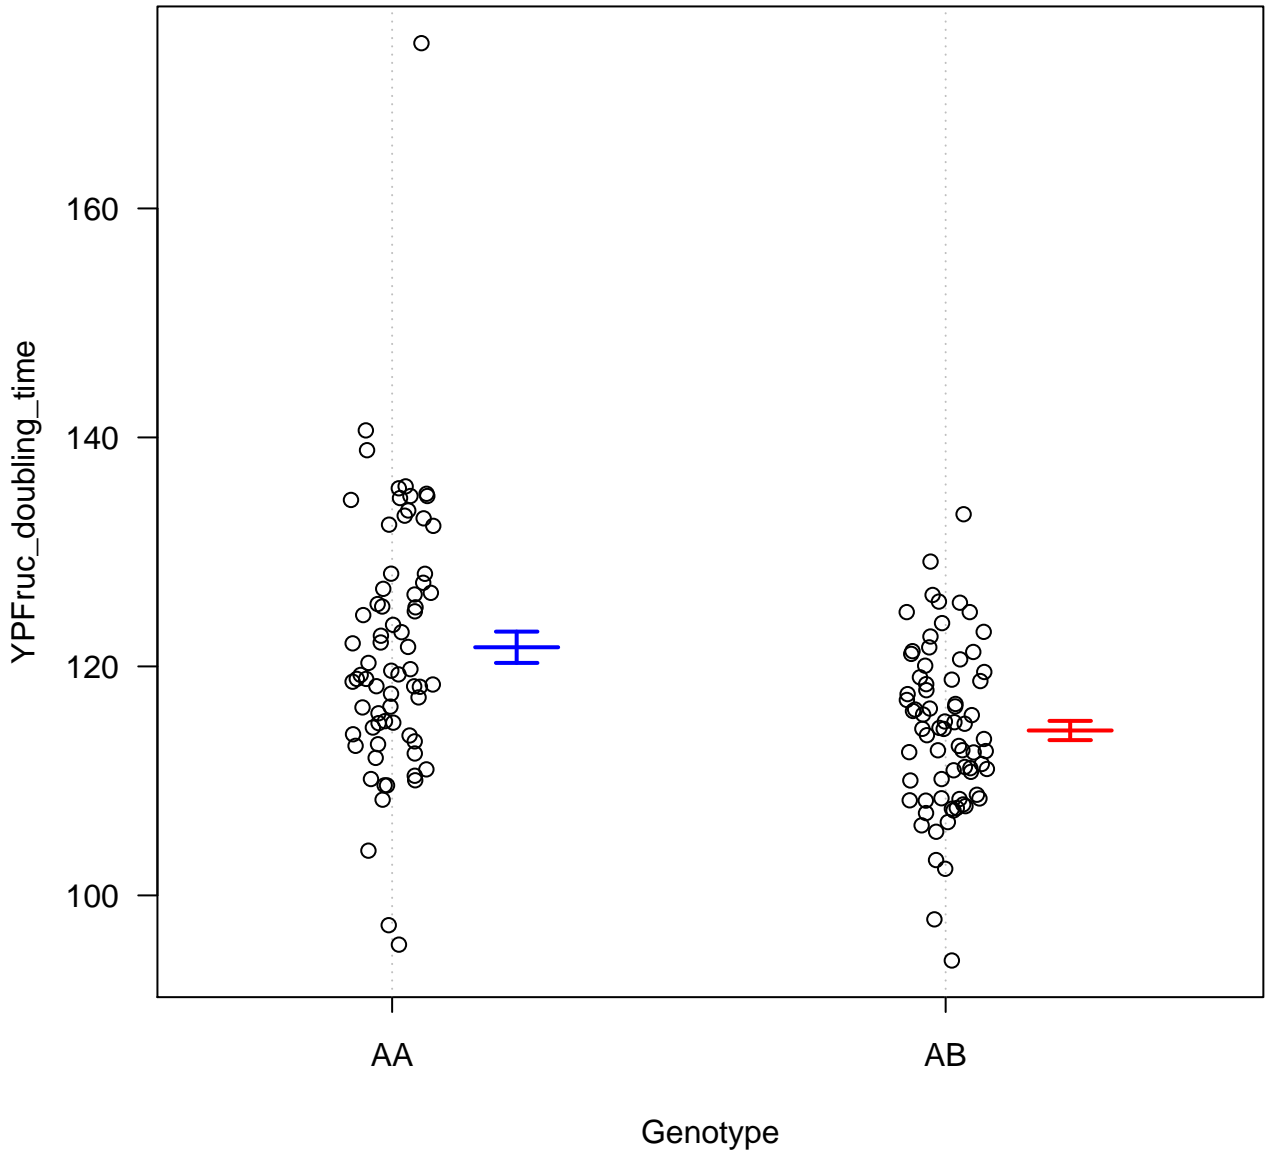

chr05\_371899

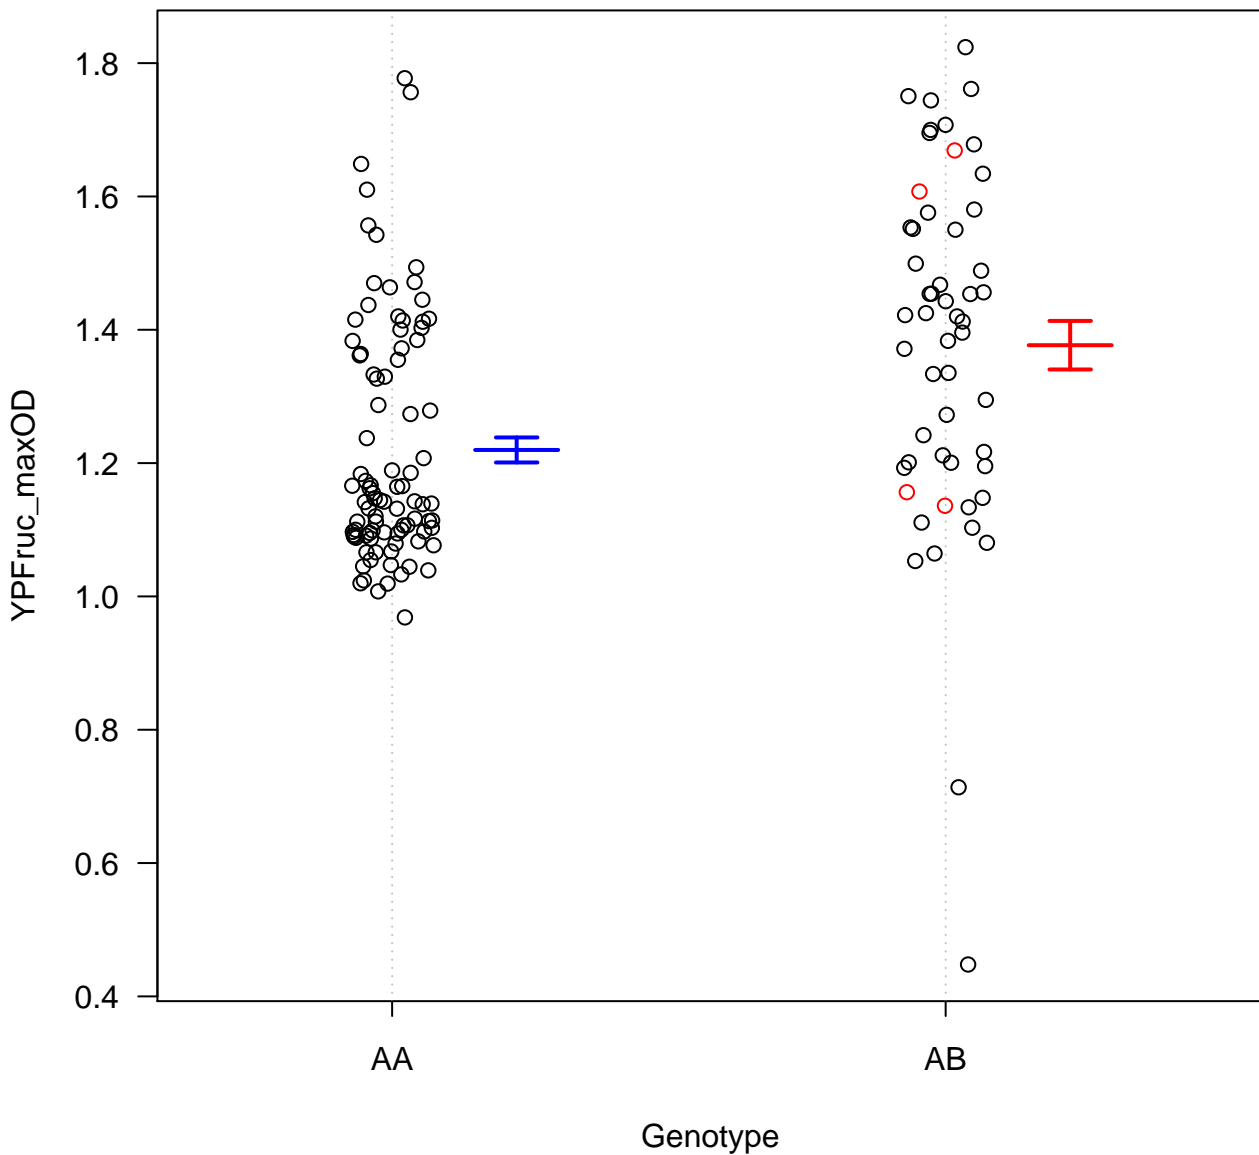

chr14\_441202

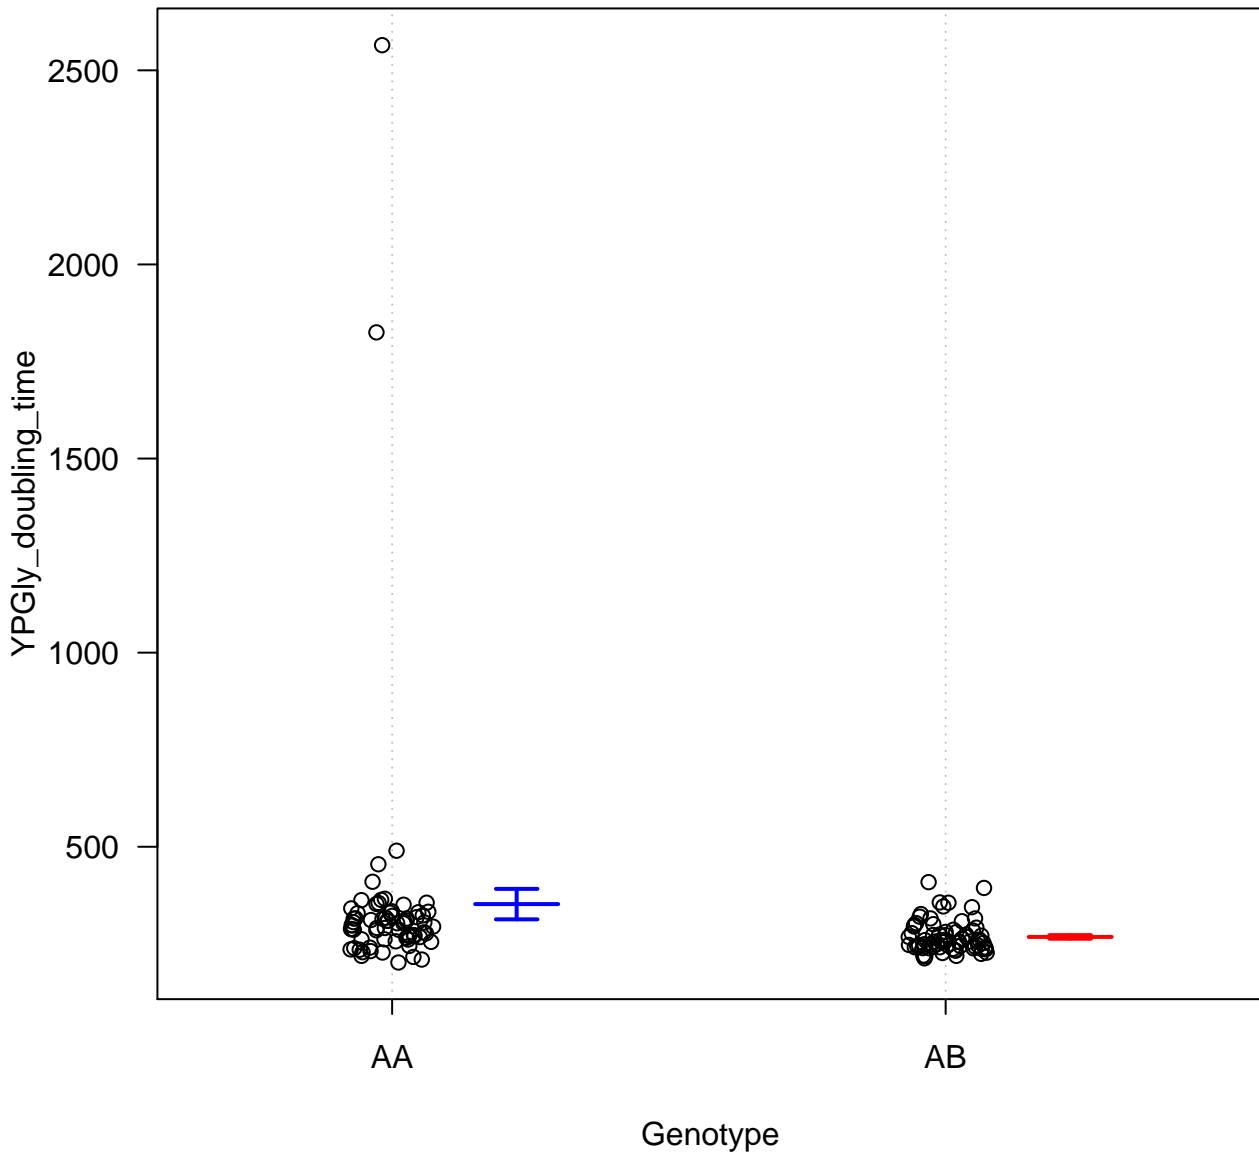



chr14\_467221

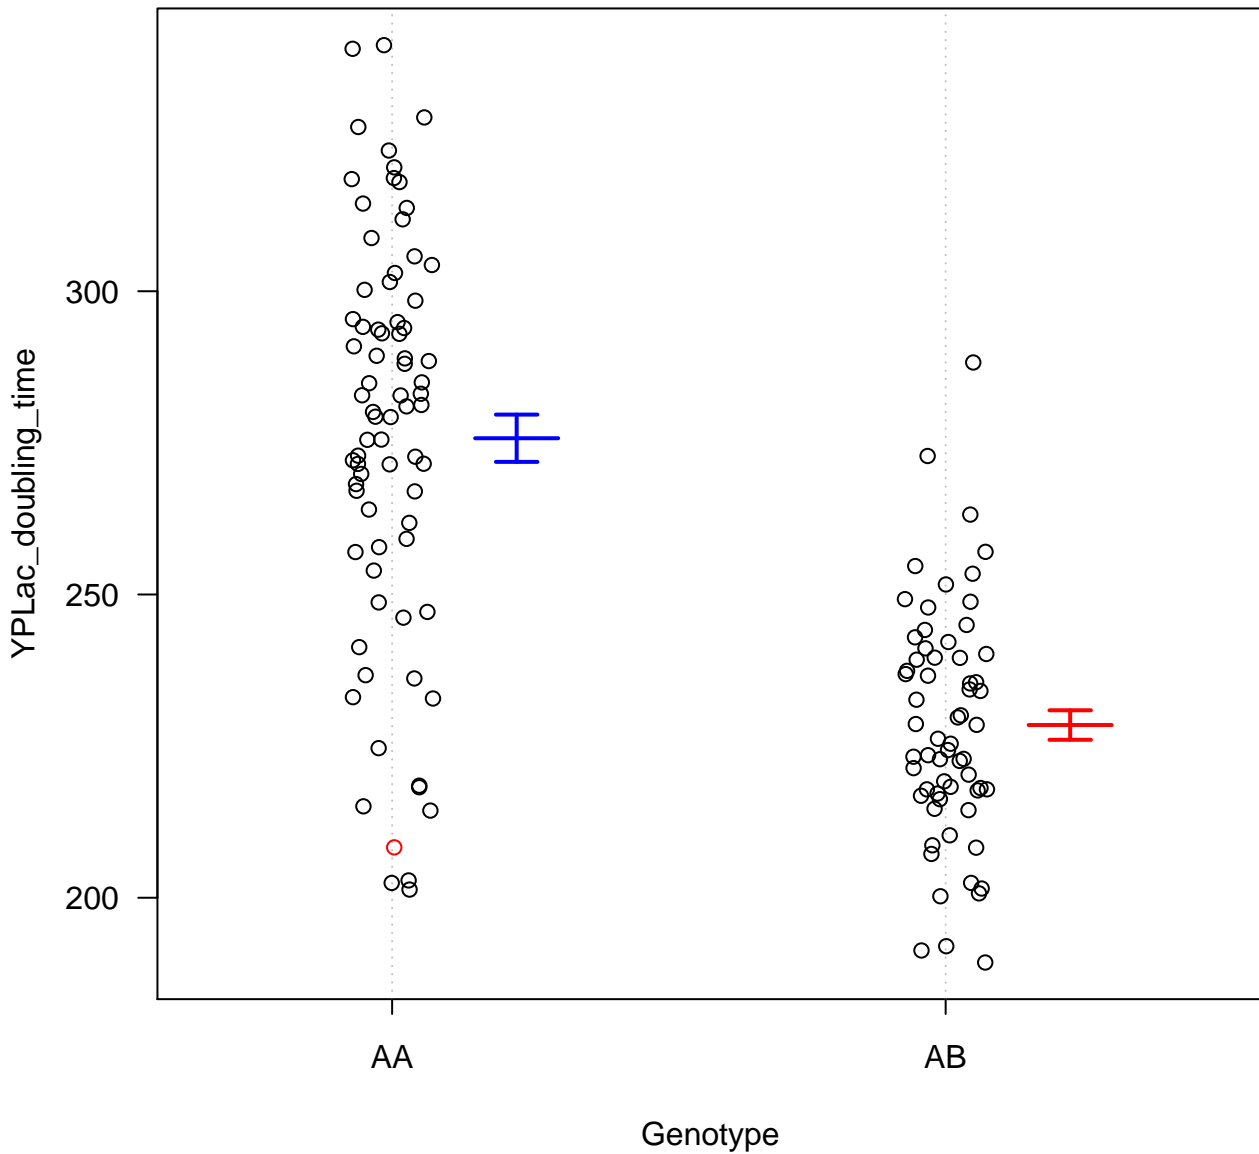

chr03\_56309

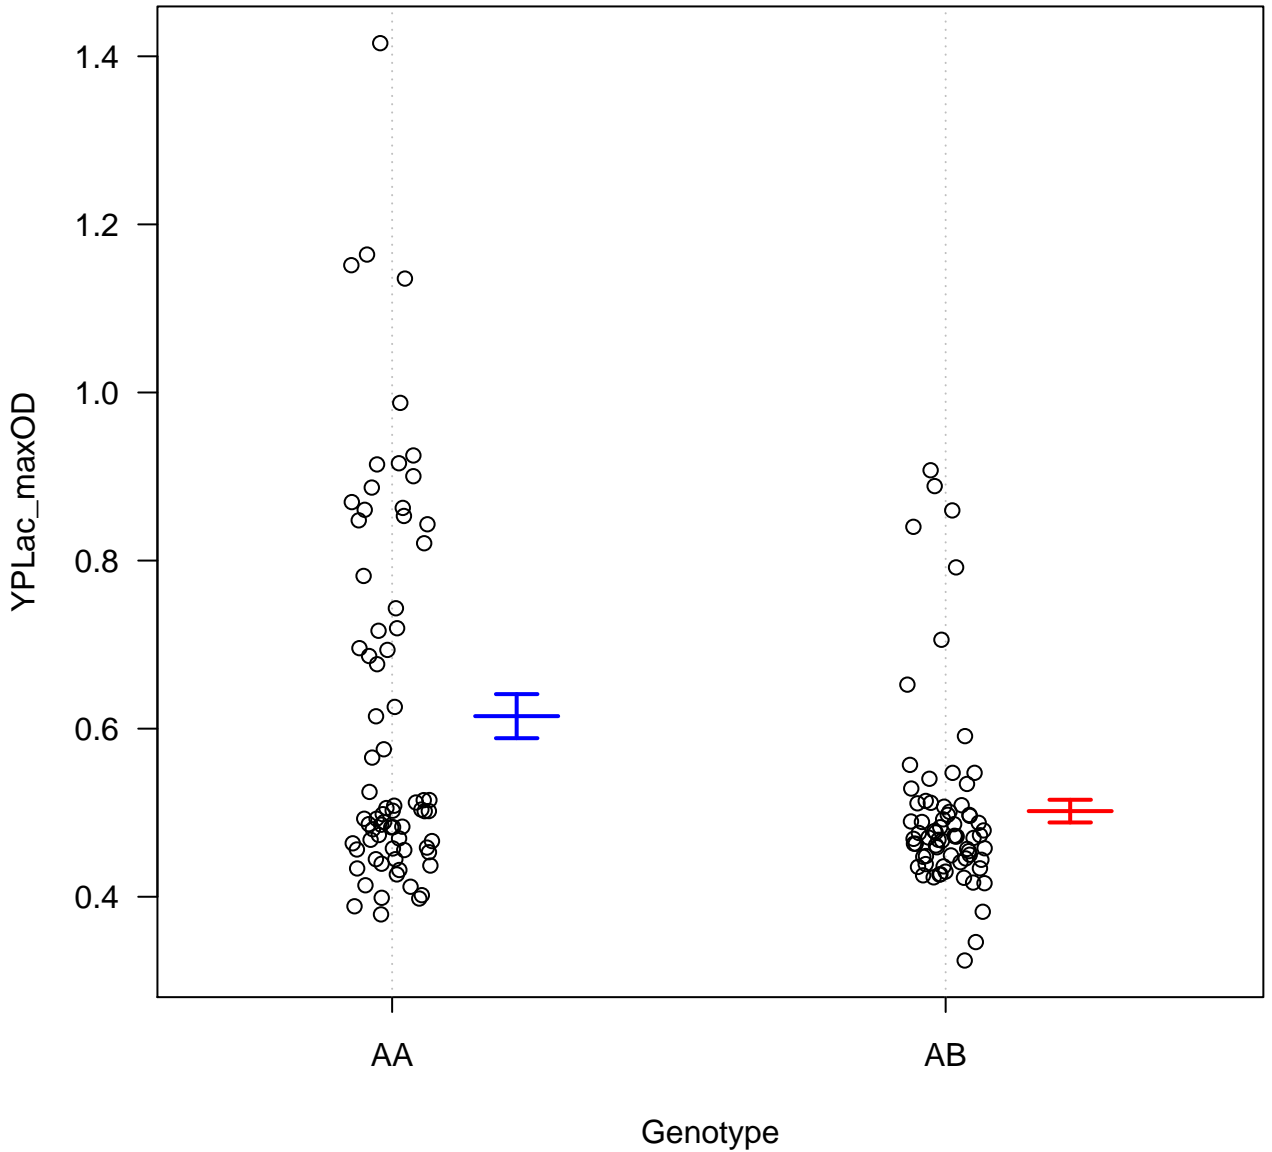

chr07\_1069012

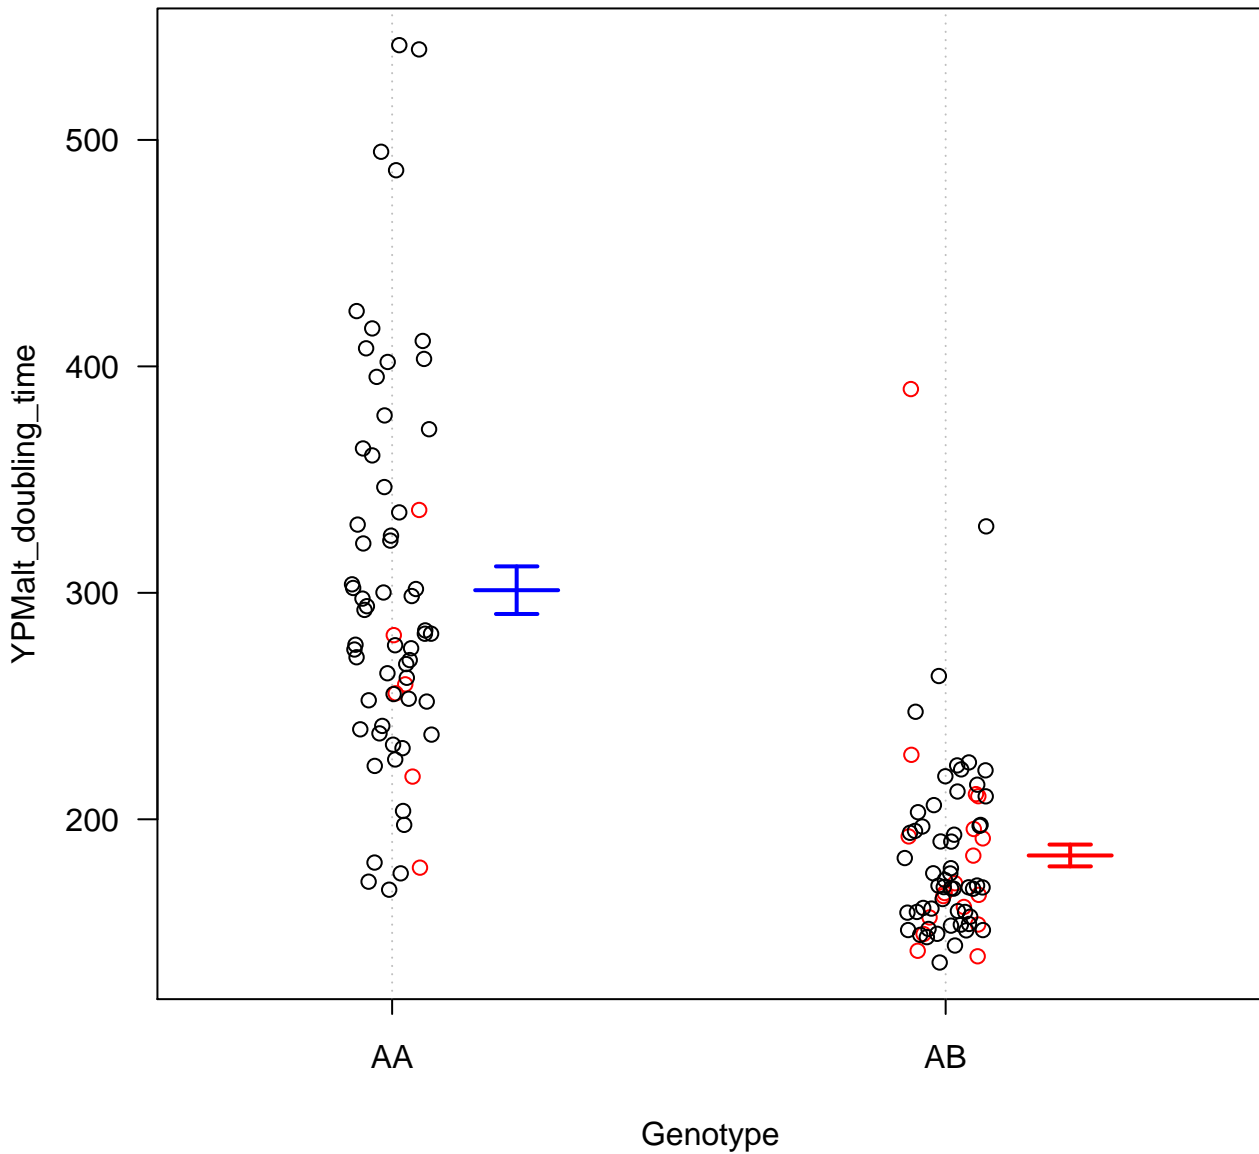

chr15\_656568

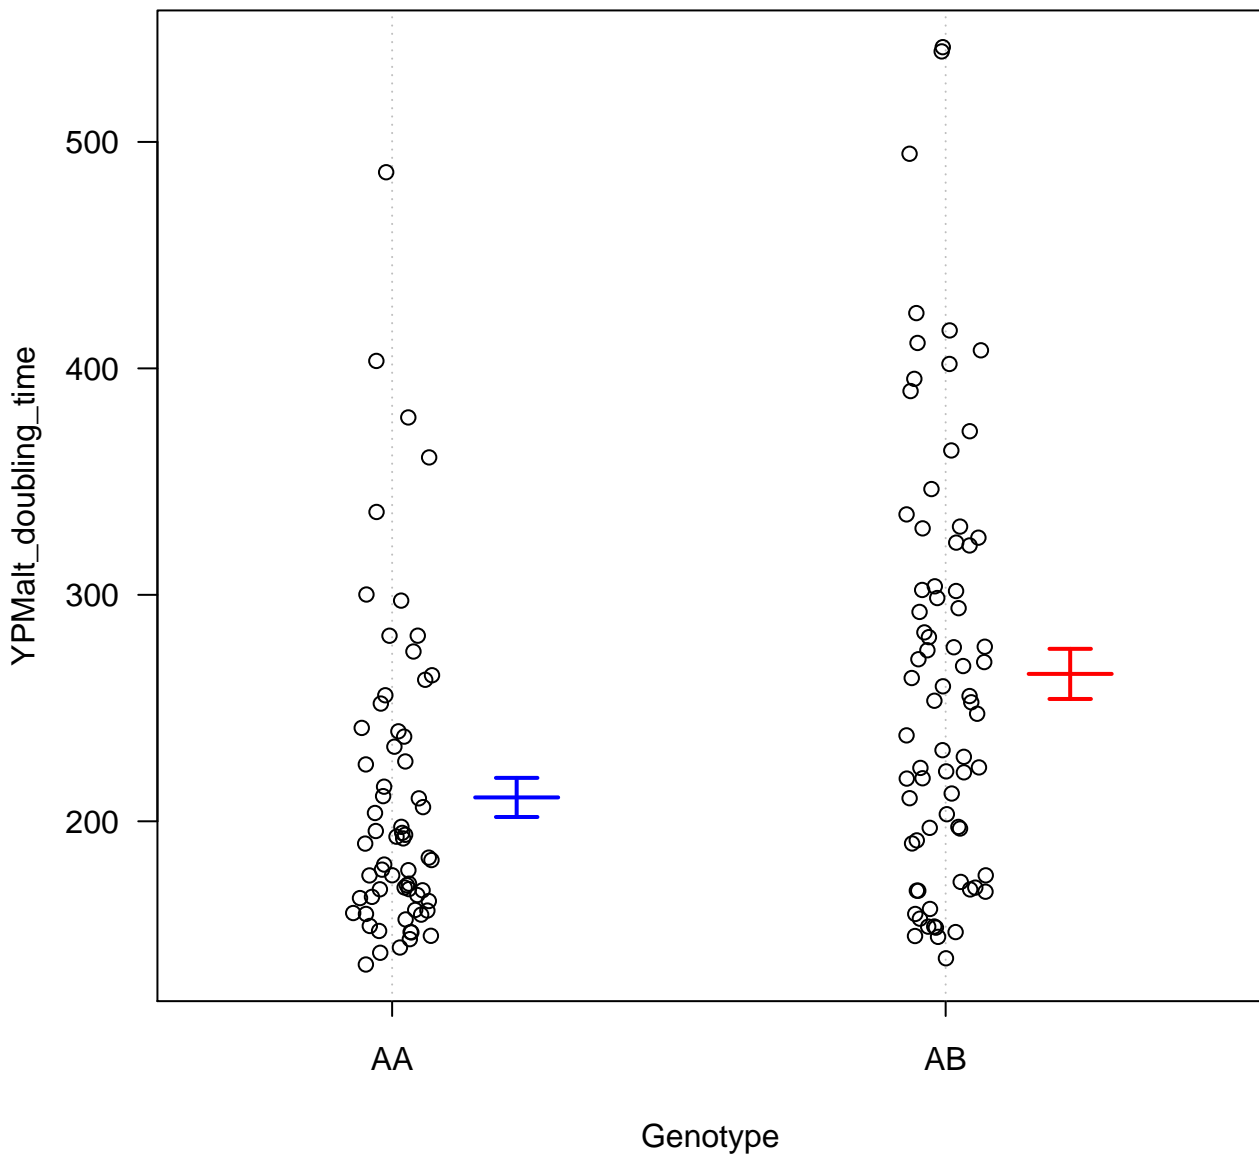

chr07\_1069000

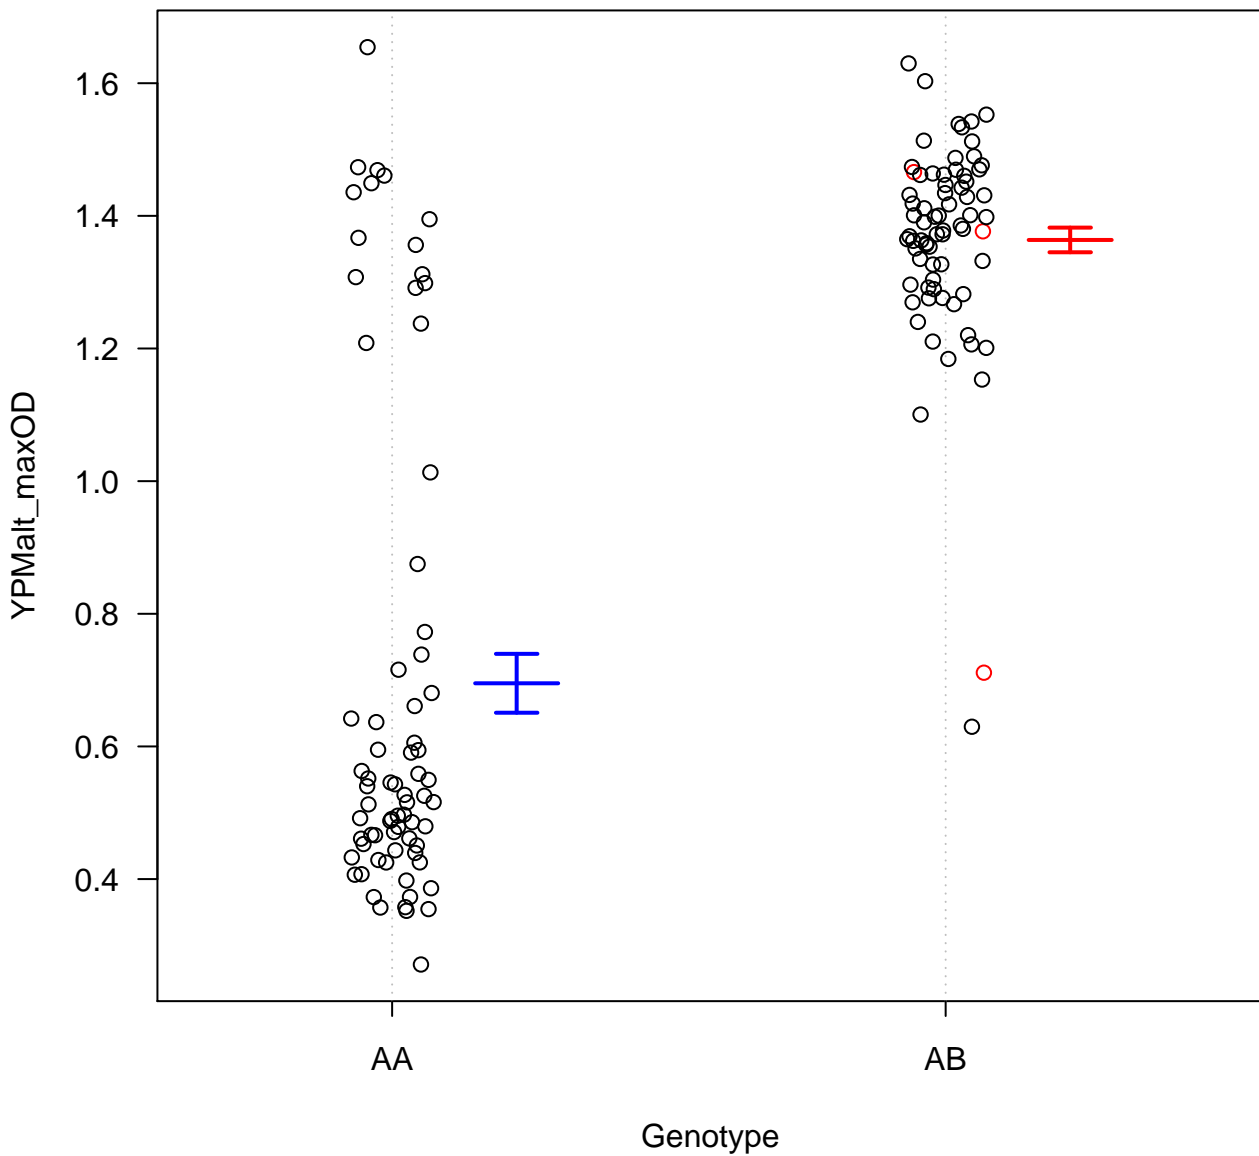

chr02\_516338

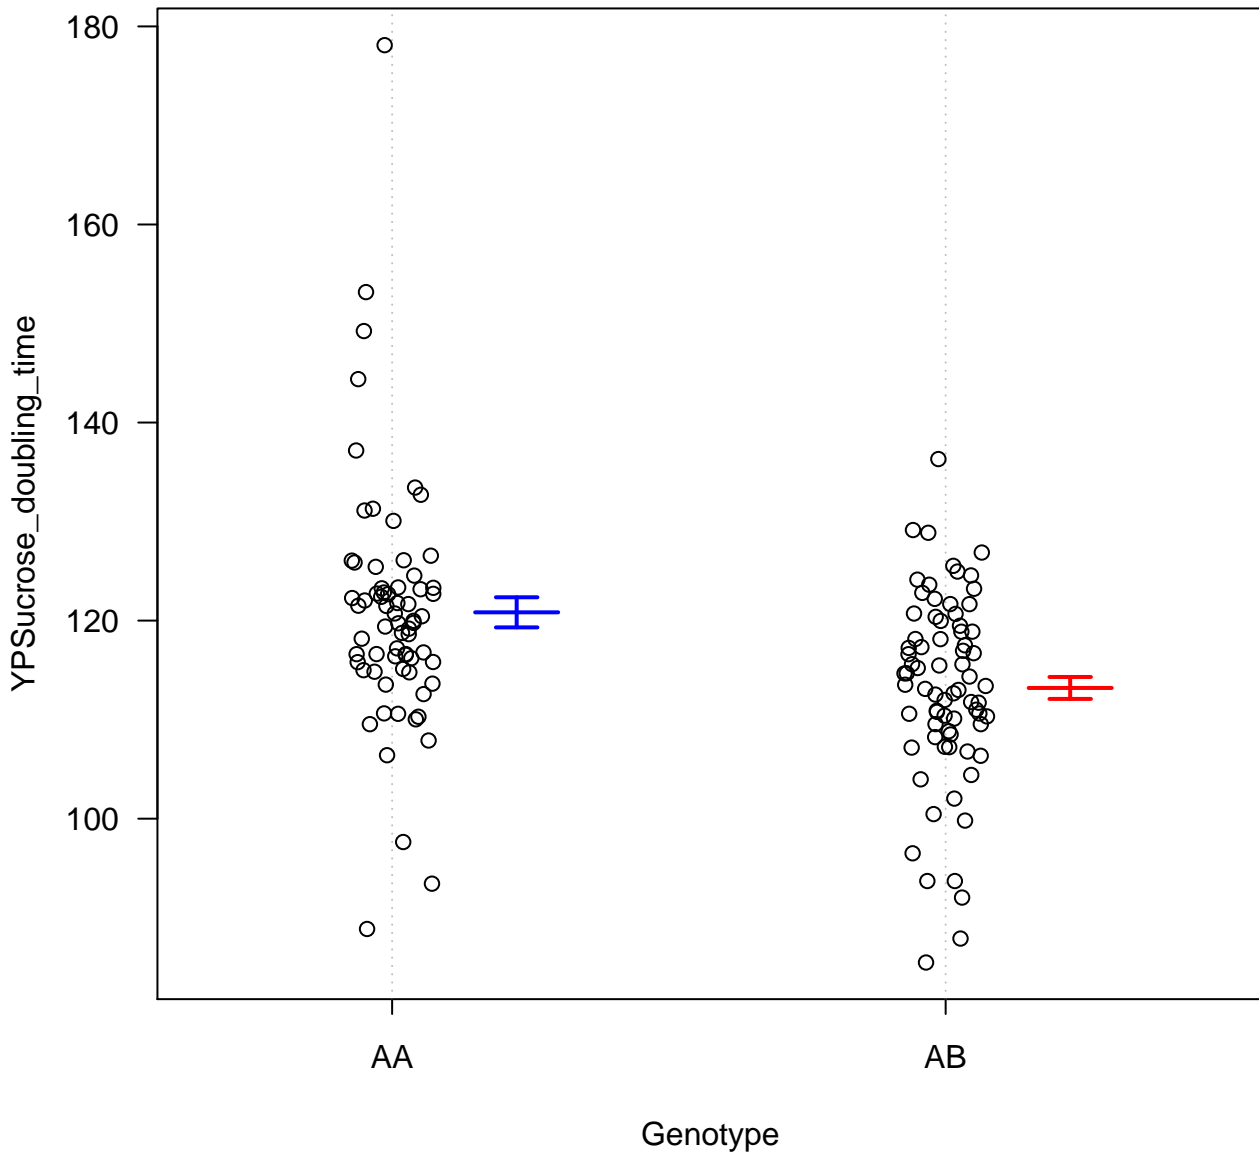

Supplement: supp_g3.113.009142_FigureS1.pdf [file supp_g3.113.009142_FigureS1.pdf]
