# Supplementary material for: Yeast Growth Plasticity Is Regulated by Environment-Specific Multi-QTL Interactions
Source: PubMed Central journal article supplement (PMC4025475; doi:10.1534/g3.113.009142), 2014-01-28

chr02\_558465  
chr13\_26435  
chr07\_42563

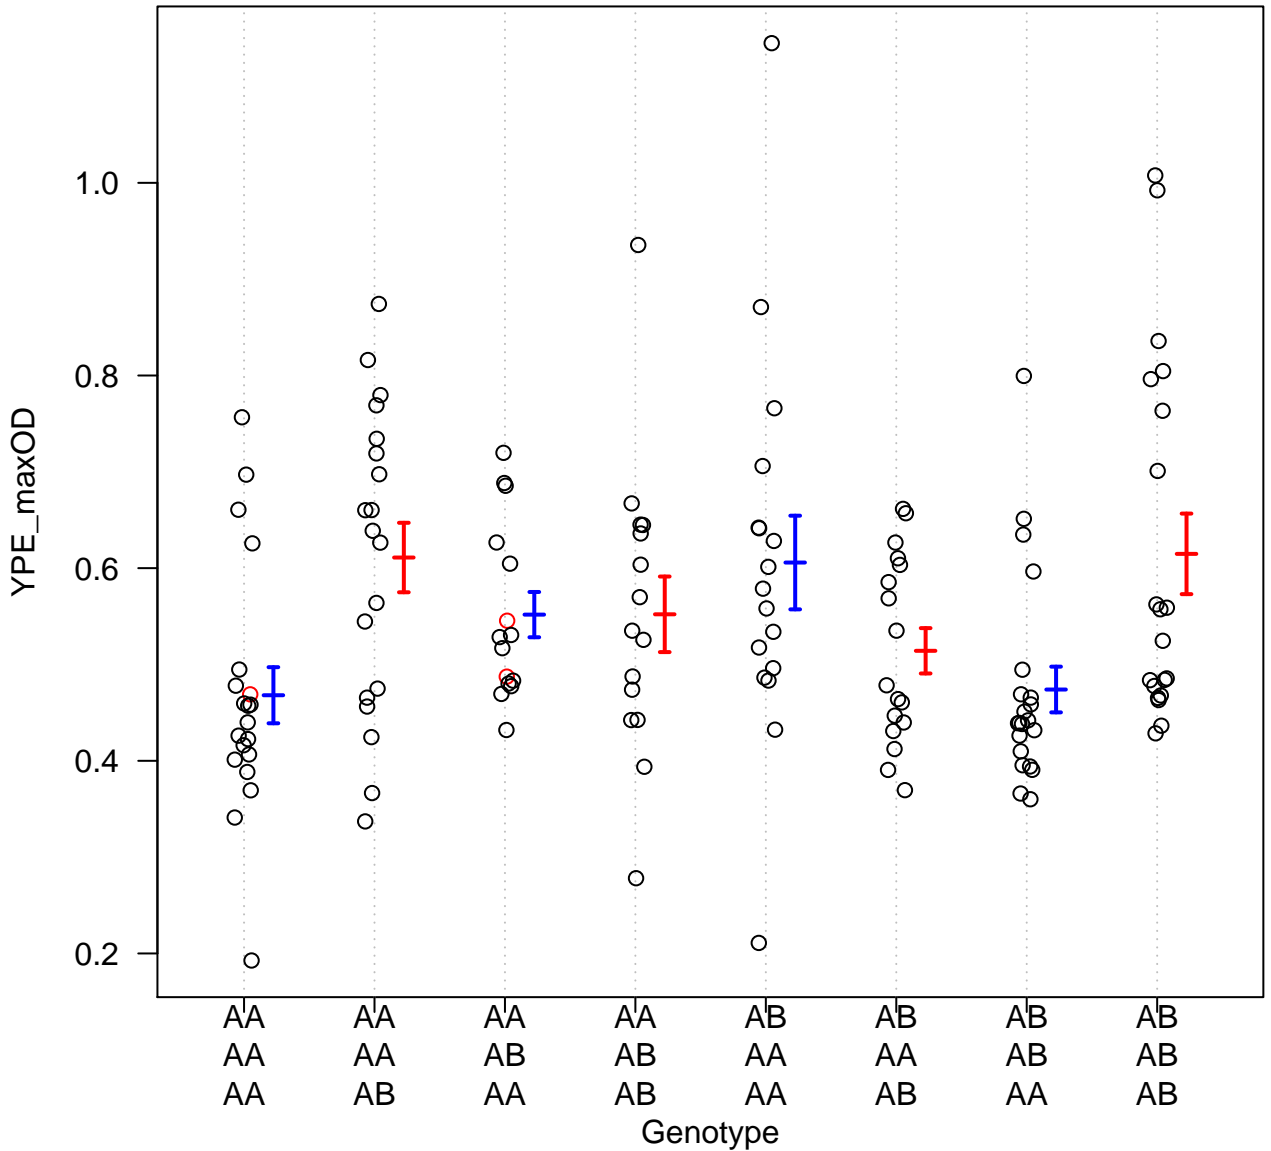

chr05\_371899  
chr13\_555077  
chr02\_182131

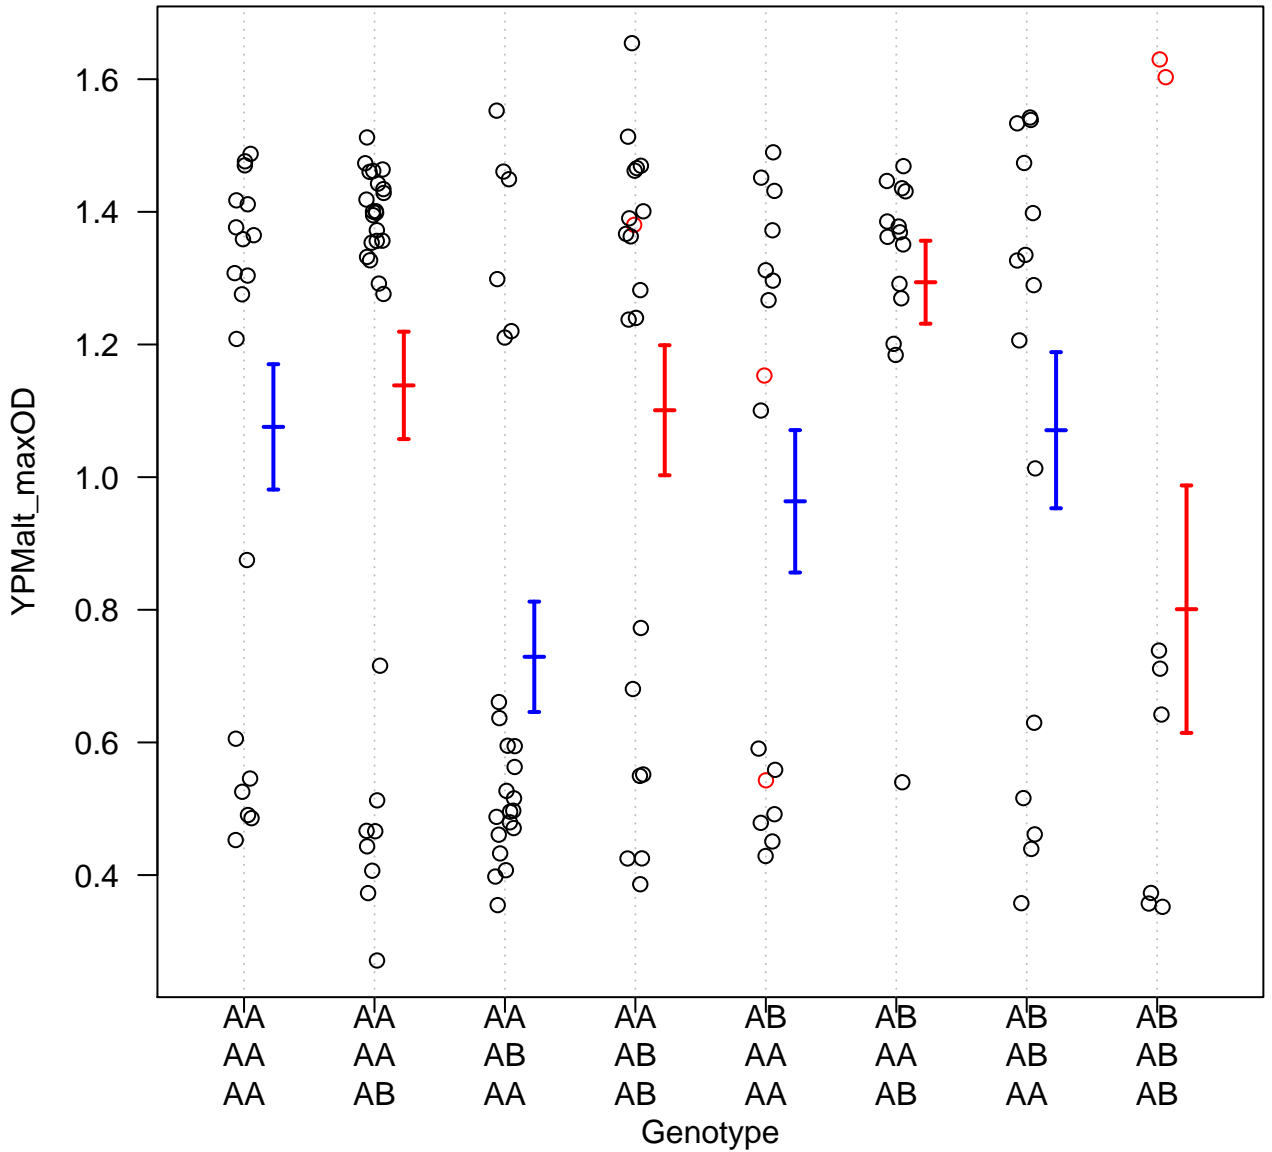

chr02\_558465  
chr08\_145761  
chr05\_377186

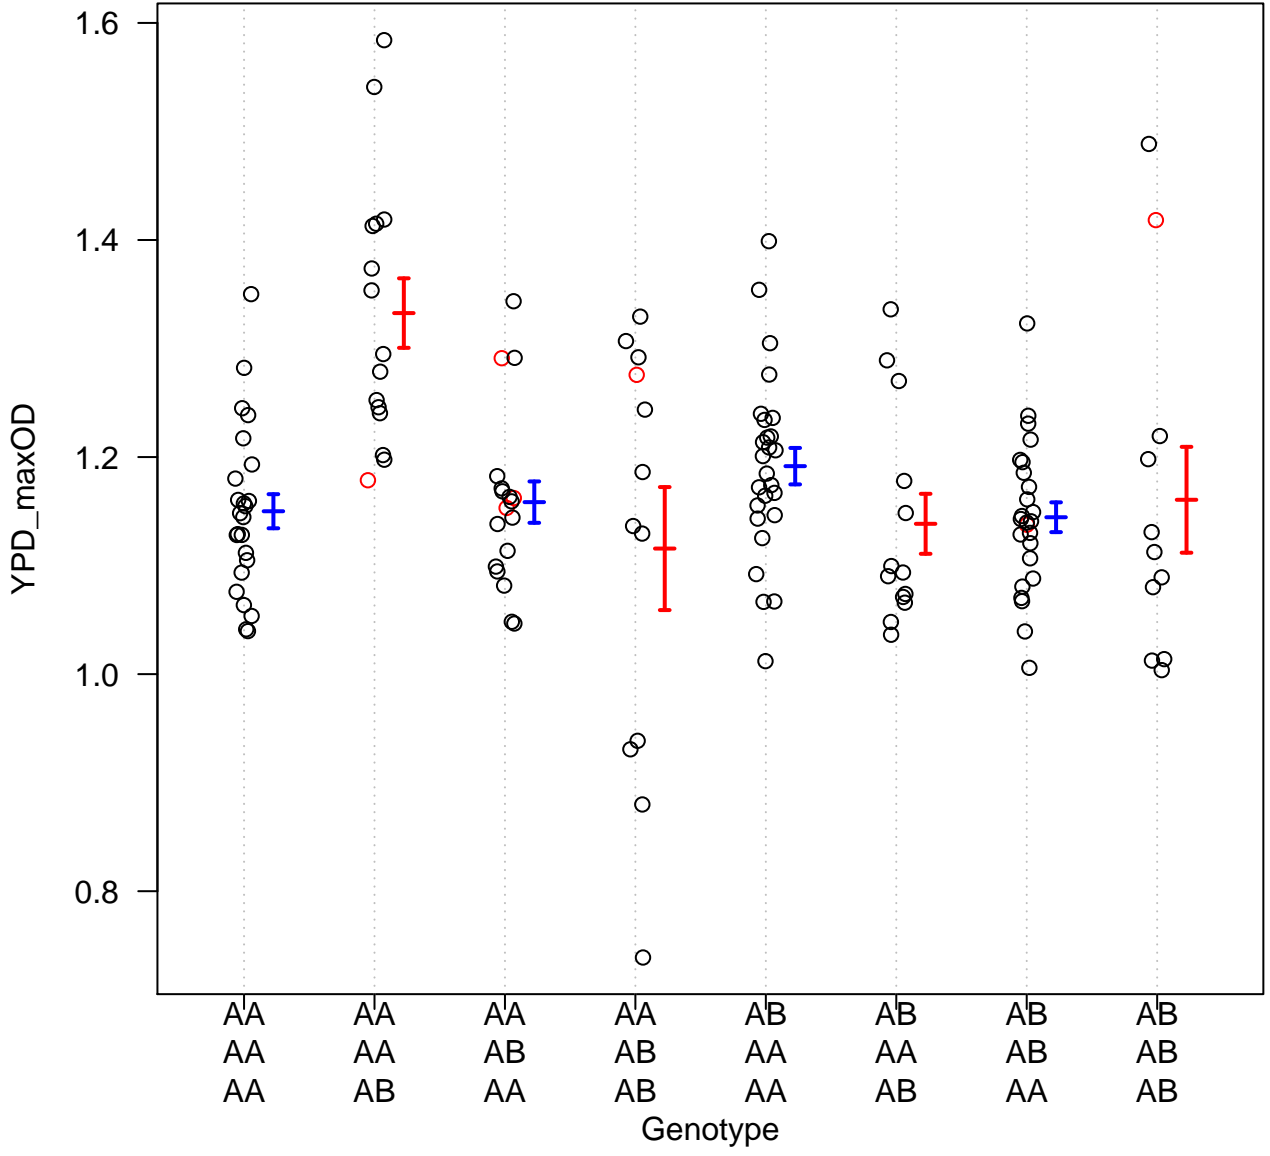

chr05\_525070  
chr15\_473018  
chr05\_371899

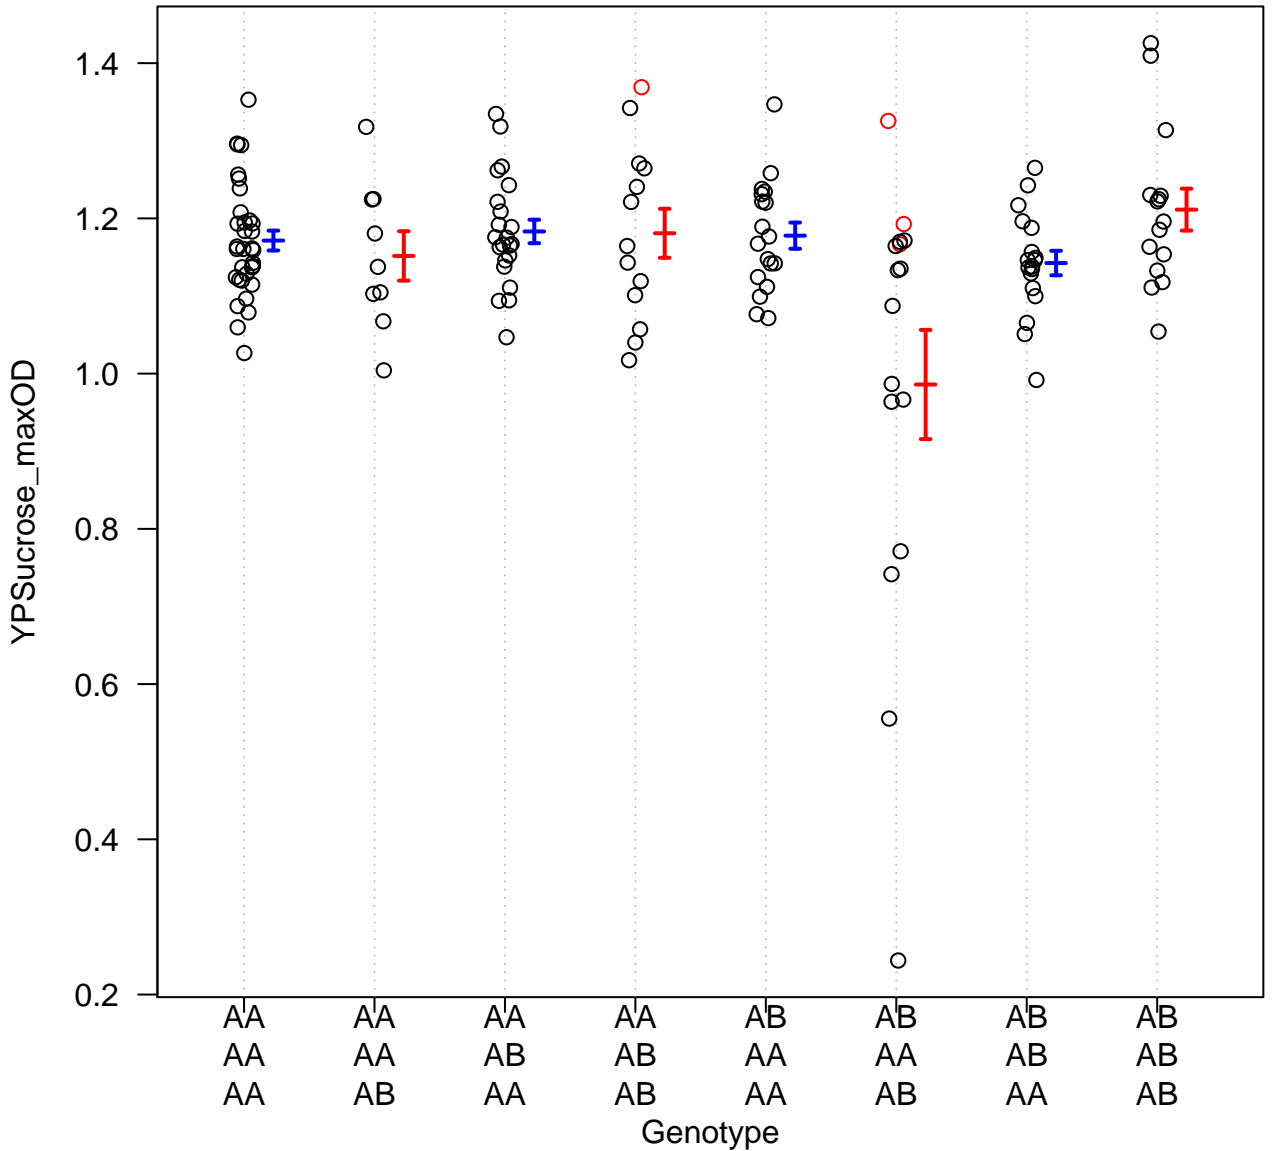

chr05\_525070  
chr05\_371899  
chr01\_62951

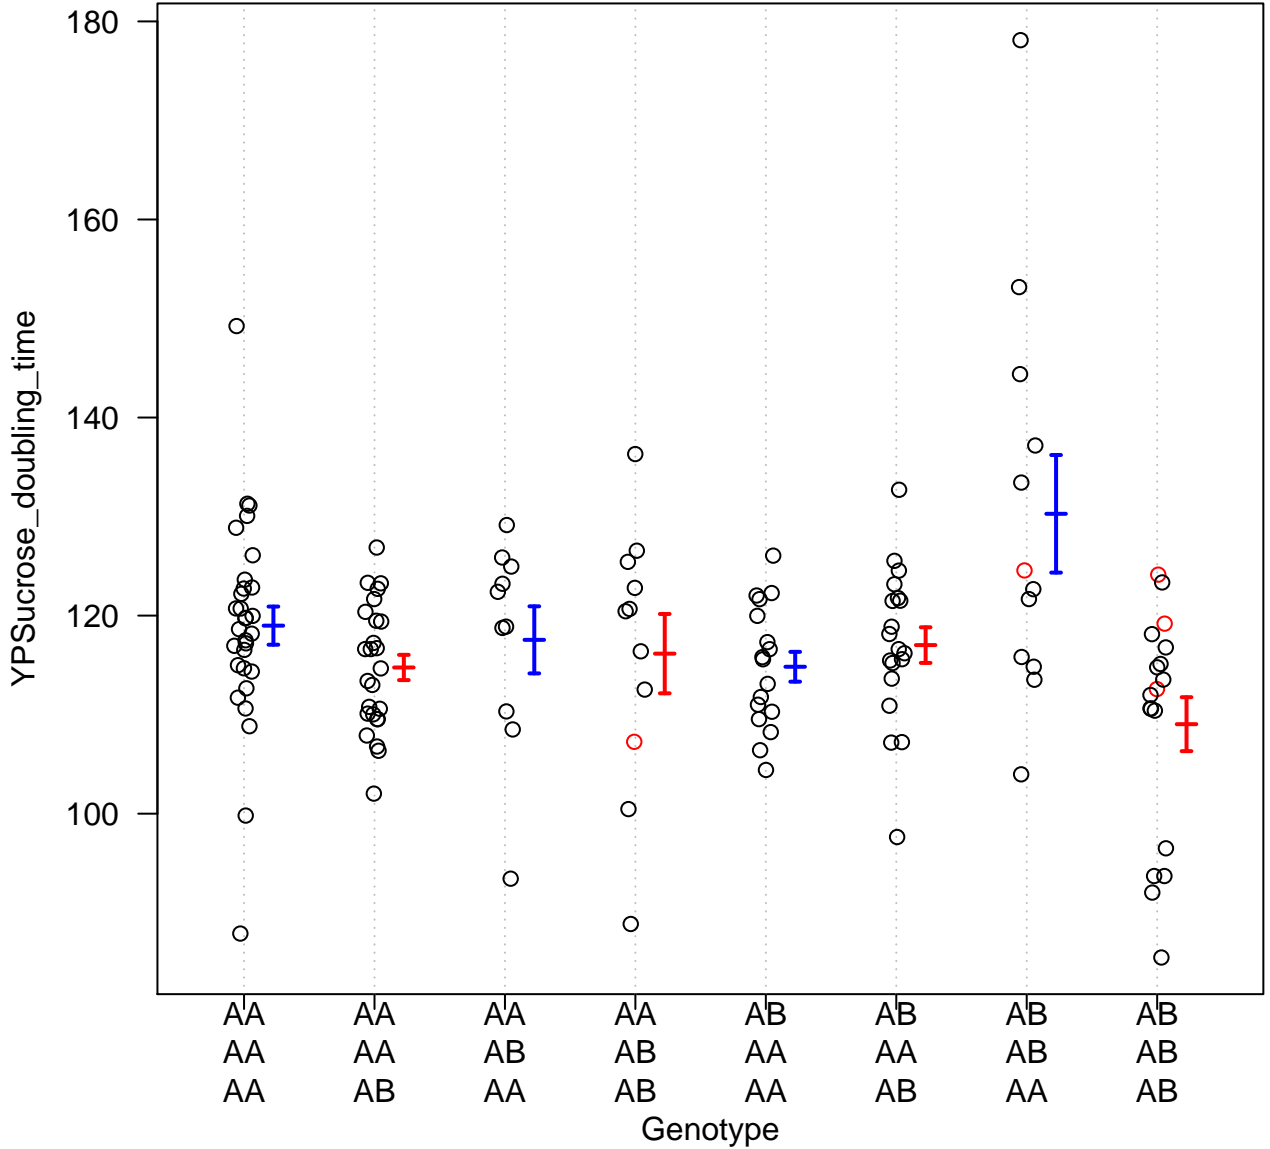

chr05\_525070  
chr05\_371899  
chr02\_516338

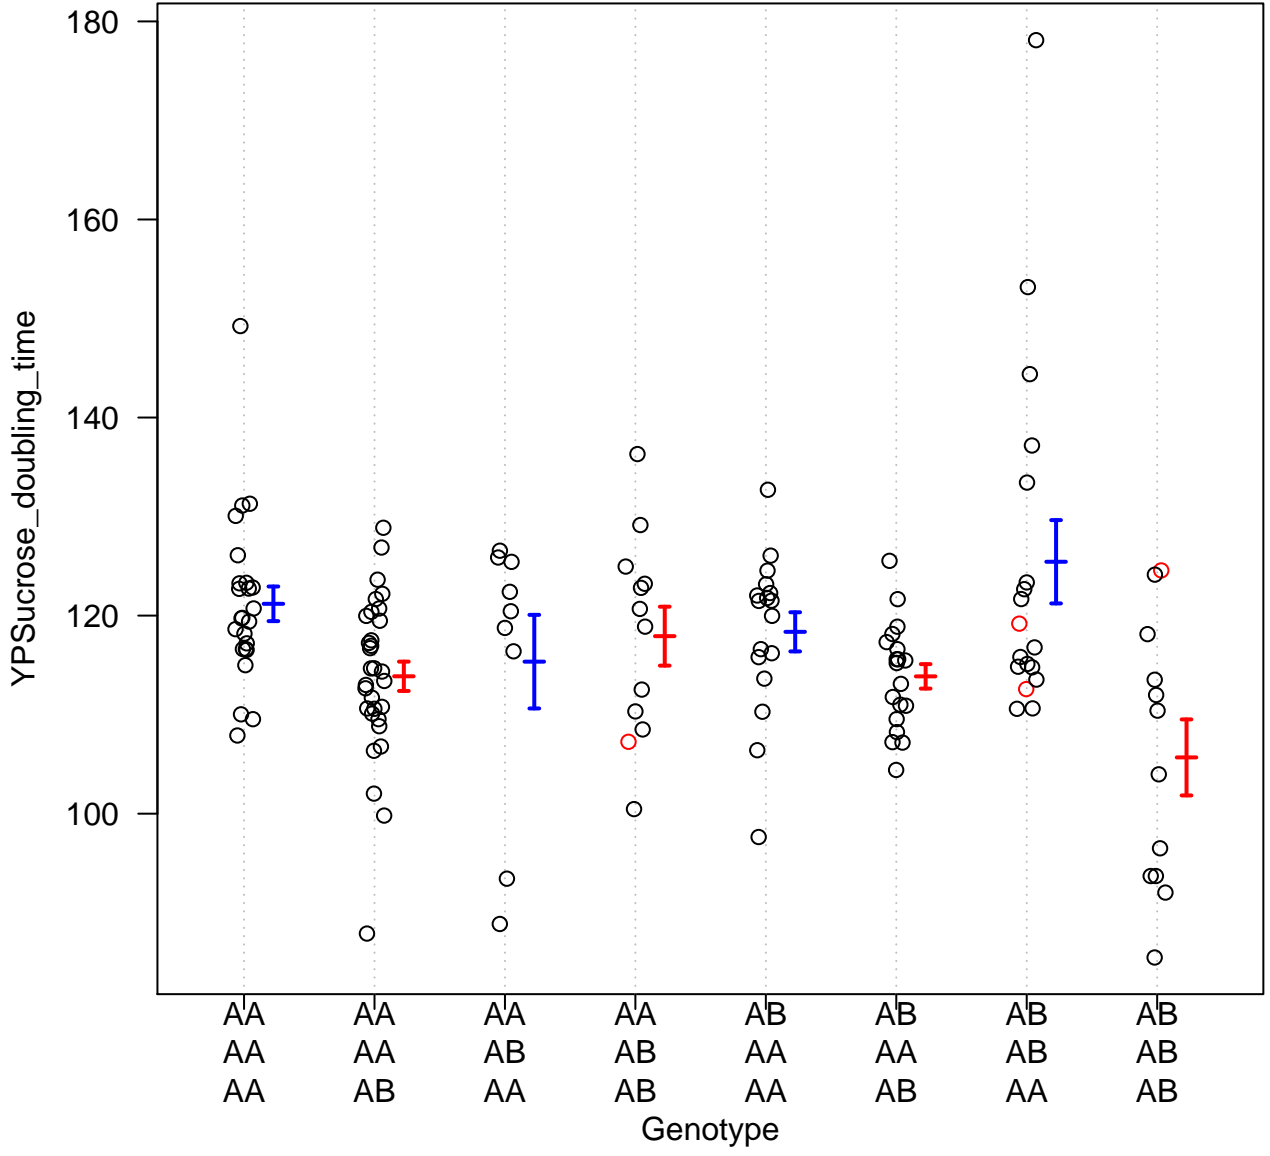

Supplement: supp_g3.113.009142_FigureS4.pdf [file supp_g3.113.009142_FigureS4.pdf]
