# Supplementary material for: Yeast Growth Plasticity Is Regulated by Environment-Specific Multi-QTL Interactions
Source: PubMed Central journal article supplement (PMC4025475; doi:10.1534/g3.113.009142), 2014-01-28
Supplement: supp_g3.113.009142_TableS1.pdf [file supp_g3.113.009142_TableS1.pdf]

**Table S1****a. Pearson Correlation Coefficient between various growth media for doubling time (n = 144 segregants).**

| Condition | Ethanol | Fructose | Glucose | Glycerol | Lactose | Maltose | Sucrose |
|-----------|---------|----------|---------|----------|---------|---------|---------|
| Ethanol   | 1.00    | 0.35     | 0.38    | 0.58     | 0.63    | 0.25    | 0.33    |
| Fructose  |         | 1.00     | 0.41    | 0.33     | 0.52    | 0.19    | 0.53    |
| Glucose   |         |          | 1.00    | 0.46     | 0.45    | 0.32    | 0.44    |
| Glycerol  |         |          |         | 1.00     | 0.59    | 0.34    | 0.34    |
| Lactose   |         |          |         |          | 1.00    | 0.40    | 0.39    |
| Maltose   |         |          |         |          |         | 1.00    | 0.15    |
| Sucrose   |         |          |         |          |         |         | 1.00    |

**b. Pearson Correlation Coefficient between various growth media for maxOD (n = 144 segregants).**

| Condition | Ethanol | Fructose | Glucose | Glycerol | Lactose | Maltose | Sucrose |
|-----------|---------|----------|---------|----------|---------|---------|---------|
| Ethanol   | 1.00    | 0.13     | 0.11    | 0.11     | 0.04    | 0.01    | 0.22    |
| Fructose  |         | 1.00     | 0.18    | 0.30     | 0.27    | 0.07    | 0.12    |
| Glucose   |         |          | 1.00    | 0.14     | -0.02   | 0.10    | 0.27    |
| Glycerol  |         |          |         | 1.00     | 0.49    | 0.05    | 0.11    |
| Lactose   |         |          |         |          | 1.00    | 0.03    | 0.05    |
| Maltose   |         |          |         |          |         | 1.00    | 0.19    |
| Sucrose   |         |          |         |          |         |         | 1.00    |
