# Supplementary material for: Yeast Growth Plasticity Is Regulated by Environment-Specific Multi-QTL Interactions
Source: PubMed Central journal article supplement (PMC4025475; doi:10.1534/g3.113.009142), 2014-01-28
Supplement: supp_g3.113.009142_TableS2.pdf [file supp_g3.113.009142_TableS2.pdf]

### Broad sense heritability

To calculate broad sense heritability, we used the `lmer` function in the `lme4` R package (Bates 2010) to perform an analysis of variance with a random effects model on 2 experimental replicates of segregant data (following procedure described in Poecke *et al.* 2007).

The `confint` function (Bates 2010) was used to compute standard errors of the variance estimates provided by `lmer`, and these errors were then propagated to compute the 95% confidence intervals for the broad sense heritability.

**Table S2** Broad sense heritabilities for each growth parameter and environmental condition (parentheses indicate 95% CI).

| Condition     | Ethanol              | Fructose             | Glucose              | Glycerol             | Lactose              | Maltose              | Sucrose              |
|---------------|----------------------|----------------------|----------------------|----------------------|----------------------|----------------------|----------------------|
| Doubling time | 0.13<br>(0.07, 0.18) | 0.44<br>(0.32, 0.55) | 0.65<br>(0.59, 0.72) | 0.96<br>(0.95, 0.98) | 0.40<br>(0.29, 0.52) | 0.53 (0.46,<br>0.61) | 0.20<br>(0.03, 0.36) |
| maxOD         | 0.04<br>(0.01, 0.09) | 0.41<br>(0.30, 0.53) | 0.15<br>(0.09, 0.21) | 0.36<br>(0.25, 0.47) | 0.14<br>(0.00, 0.32) | 0.70<br>(0.63, 0.77) | 0.72<br>(0.62, 0.82) |

### References

- Van Poecke, Remco MP, et al. "Natural variation in RPS2-mediated resistance among Arabidopsis accessions: correlation between gene expression profiles and phenotypic responses." *The Plant Cell Online* 19.12 (2007): 4046-4060.
- Bates, Douglas M. "lme4: Mixed-effects modeling with R." URL <http://lme4.r-forge.r-project.org/book> (2010).
- Broman, Karl W., and Saunak Sen. *A guide to QTL mapping with R-qt1*. Springer, 2009.
